# Supplementary material
Source: publisher site journal article supplement (https://www.spandidos-publications.com/1671/downloadSupplementary)
Supplement: Supplementary file 1 [file downloadSupplementary]

## Sheet: supplementary table 1
Differentially expressed circRNAs for: up_GC_vs_HC Fold Change cut-off: 2.00 P-value cut-off: 0.05 Column A: CircRNAID, the ID of the identified circRNA by DCC. Column B ~ G: edgeR results for differentially expressed circRNAs. Column H ~ Q: junction reads, the junction read number of each sample. Column R ~ AA: logCPM by edgeR. Column AA ~ AE: the coordinates of circRNA. Column AF: circBaseID, t…
	GC_vs_HC up regulated circRNAs
	P-value, Fold change and Regulation						junction reads										logCPM by edgeR										Annotations
CircRNAID	logFC	logCPM	LR	PValue	FDR	regulation	GC190121	GC190122	GC190124	GC190125-2	GC190128-2	HC190128-1	HC190128-2	HC190128-3	HC190128-4	HC190128-5	GC190121	GC190122	GC190124	GC190125-2	GC190128-2	HC190128-1	HC190128-2	HC190128-3	HC190128-4	HC190128-5	chrom	txStart	txEnd	strand	circBaseID	source	best_transcript	GeneName	Catalog	predicted_sequence_length	circRNA-associated diseases
chr10:27356086-27368090-	8.34864	8.16115	20.7999	5.09867e-06	0.0655171	up	0	0	128	0	0	0	0	0	0	0	1.67959	1.67959	11.3555	1.67959	1.67959	1.67959	1.67959	1.67959	1.67959	1.67959	chr10	27356085	27368090	-	hsa_circ_0093425	circBase	NM_014915	ANKRD26	exonic	467
chr2:153535866-153537850-	8.2675	8.08719	20.1514	7.15473e-06	0.0655171	up	0	0	121	0	0	0	0	0	0	0	1.67959	1.67959	11.2745	1.67959	1.67959	1.67959	1.67959	1.67959	1.67959	1.67959	chr2	153535865	153537850	-		novel	NM_017892	PRPF40A	exonic	232
chr1:235582788-235594119+	8.21995	8.04356	19.781	8.68428e-06	0.0655171	up	7	15	102	2	0	0	0	0	0	0	6.59615	7.55776	11.0284	4.9205	1.67959	1.67959	1.67959	1.67959	1.67959	1.67959	chr1	235582787	235594119	+	hsa_circ_0007247	circBase	NM_003193	TBCE	exonic	289
chr9:72895675-72901187+	8.09464	7.9308	18.8359	1.42459e-05	0.080607	up	0	0	104	5	0	0	0	0	0	0	1.67959	1.67959	11.0563	6.14783	1.67959	1.67959	1.67959	1.67959	1.67959	1.67959	chr9	72895674	72901187	+		novel	NM_015110	SMC5	exonic	375
chr13:25839957-25848325-	7.6344	7.52429	15.5828	7.89683e-05	0.307215	up	0	0	78	0	0	0	0	0	0	0	1.67959	1.67959	10.642	1.67959	1.67959	1.67959	1.67959	1.67959	1.67959	1.67959	chr13	25839956	25848325	-	hsa_circ_0029780	circBase	NM_004685	MTMR6	exonic	567
chr14:31163979-31177120+	7.58962	7.48549	15.2332	9.50165e-05	0.307215	up	0	1	75	0	0	0	0	0	0	0	1.67959	3.95891	10.5856	1.67959	1.67959	1.67959	1.67959	1.67959	1.67959	1.67959	chr14	31163978	31177120	+		novel	NM_016106	SCFD1	sense overlapping	13142
chr10:49609655-49618211+	7.52662	7.42898	14.7558	0.00012237	0.346199	up	6	20	3	1	76	0	0	0	0	0	6.3817	7.96665	6.01213	4.06556	10.0612	1.67959	1.67959	1.67959	1.67959	1.67959	chr10	49609654	49618211	+	hsa_circ_0002968	circBase	NM_002750	MAPK8	exonic	499
chr15:23191491-23191920-	7.46821	7.38114	14.3184	0.000154348	0.388151	up	1	3	67	0	0	0	0	0	0	0	4.05022	5.33075	10.4232	1.67959	1.67959	1.67959	1.67959	1.67959	1.67959	1.67959	chr15	23191490	23191920	-		novel	NR_003521	WHAMMP3	exonic	176
chr11:11941703-11951112+	7.43701	7.35464	14.0908	0.000174194	0.394254	up	0	0	68	0	0	0	0	0	0	0	1.67959	1.67959	10.4445	1.67959	1.67959	1.67959	1.67959	1.67959	1.67959	1.67959	chr11	11941702	11951112	+	hsa_circ_0095163	circBase	NM_017944	USP47	exonic	549
chrX:147733520-147744289+	7.39889	7.32221	13.8172	0.00020148	0.414554	up	0	2	65	0	0	0	0	0	0	0	1.67959	4.80209	10.3796	1.67959	1.67959	1.67959	1.67959	1.67959	1.67959	1.67959	chrX	147733519	147744289	+	hsa_circ_0091669	circBase	NM_002025	AFF2	exonic	994
chr8:38643194-38646337+	7.3042	7.24239	13.1571	0.000286431	0.432824	up	0	0	62	0	0	0	0	0	0	0	1.67959	1.67959	10.3116	1.67959	1.67959	1.67959	1.67959	1.67959	1.67959	1.67959	chr8	38643193	38646337	+		novel	uc003xma.3	TACC1	intronic	3144
chr5:144852173-144852878-	7.15795	7.1207	12.1922	0.000479901	0.432824	up	0	0	56	0	0	0	0	0	0	0	1.67959	1.67959	10.1651	1.67959	1.67959	1.67959	1.67959	1.67959	1.67959	1.67959	chr5	144852172	144852878	-		novel	T290765	G067974	intronic	706
chr20:31292242-31292706-	7.07888	7.05579	11.6974	0.000625886	0.432824	up	0	0	53	0	0	0	0	0	0	0	1.67959	1.67959	10.0859	1.67959	1.67959	1.67959	1.67959	1.67959	1.67959	1.67959	chr20	31292241	31292706	-		novel	NM_053041	COMMD7	exonic	141
chr9:114842354-114874120-	7.02365	7.01084	11.3627	0.000749327	0.432824	up	0	0	51	0	0	0	0	0	0	0	1.67959	1.67959	10.0306	1.67959	1.67959	1.67959	1.67959	1.67959	1.67959	1.67959	chr9	114842353	114874120	-		novel	NM_022486	SUSD1	exonic	582
chr2:61468695-61484485-	6.96261	7.94712	15.5087	8.21268e-05	0.307215	up	0	17	98	0	0	0	0	1	0	0	1.67959	7.73544	10.9707	1.67959	1.67959	1.67959	1.67959	3.39273	1.67959	1.67959	chr2	61468694	61484485	-	hsa_circ_0120579	circBase	NM_014709	USP34	exonic	933
chr3:160131261-160137331+	6.91531	6.92318	10.7425	0.00104704	0.432824	up	10	16	7	14	21	0	0	0	0	0	7.09632	7.64933	7.19301	7.59074	8.21689	1.67959	1.67959	1.67959	1.67959	1.67959	chr3	160131260	160137331	+		novel	NM_005496	SMC4	exonic	877
chr17:41893406-41901373-	6.90852	6.91775	10.7042	0.0010689	0.432824	up	0	0	0	0	68	0	0	0	0	0	1.67959	1.67959	1.67959	1.67959	9.90126	1.67959	1.67959	1.67959	1.67959	1.67959	chr17	41893405	41901373	-	hsa_circ_0106926	circBase	NM_001932	MPP3	exonic	400
chr15:73854237-73866136-	6.90644	6.91652	10.68	0.00108299	0.432824	up	0	0	47	0	0	0	0	0	0	0	1.67959	1.67959	9.91311	1.67959	1.67959	1.67959	1.67959	1.67959	1.67959	1.67959	chr15	73854236	73866136	-	hsa_circ_0007390	circBase	NM_012428	NPTN	exonic	505
chr6:4891947-4892337+	6.8441	6.86696	10.3115	0.00132203	0.432824	up	0	0	45	0	0	0	0	0	0	0	1.67959	1.67959	9.85059	1.67959	1.67959	1.67959	1.67959	1.67959	1.67959	1.67959	chr6	4891946	4892337	+		novel	ENST00000440139	CDYL	intronic	391
chr15:50935537-50955243-	6.83136	6.85676	10.2485	0.00136797	0.432824	up	15	0	7	0	40	0	0	0	0	0	7.66998	1.67959	7.19301	1.67959	9.13911	1.67959	1.67959	1.67959	1.67959	1.67959	chr15	50935536	50955243	-	hsa_circ_0004951	circBase	NM_017672	TRPM7	exonic	532
chr2:217005909-217006204+	6.81186	6.84149	10.1257	0.00146218	0.432824	up	2	0	40	4	0	0	0	0	0	0	4.90353	1.67959	9.68129	5.84211	1.67959	1.67959	1.67959	1.67959	1.67959	1.67959	chr2	217005908	217006204	+	hsa_circ_0119122	circBase	NM_021141	XRCC5	sense overlapping	296
chr15:28857205-28878886+	6.77645	6.81375	9.93528	0.00162141	0.432824	up	0	0	0	0	62	0	0	0	0	0	1.67959	1.67959	1.67959	1.67959	9.76846	1.67959	1.67959	1.67959	1.67959	1.67959	chr15	28857204	28878886	+	hsa_circ_0002400	circBase	ENST00000529624	HERC2P9	exonic	849
chr2:170462549-170465268+	6.7601	6.801	9.84078	0.00170685	0.432824	up	22	26	12	0	0	0	0	0	0	0	8.21529	8.34089	7.9574	1.67959	1.67959	1.67959	1.67959	1.67959	1.67959	1.67959	chr2	170462548	170465268	+	hsa_circ_0118006	circBase	NM_004792	PPIG	exonic	241
chr12:104514178-104517201-	6.754	6.79625	9.80668	0.00173879	0.432824	up	18	24	11	7	0	0	0	0	0	0	7.92923	8.2266	7.83356	6.61451	1.67959	1.67959	1.67959	1.67959	1.67959	1.67959	chr12	104514177	104517201	-	hsa_circ_0097078	circBase	NM_006166	NFYB	exonic	360
chr14:72431489-72500620+	6.74167	6.78655	9.7296	0.00181324	0.432824	up	18	0	30	0	0	0	0	0	0	0	7.92923	1.67959	9.26813	1.67959	1.67959	1.67959	1.67959	1.67959	1.67959	1.67959	chr14	72431488	72500620	+		novel	NM_001204423	RGS6	intronic	69132
chr8:93929157-93966792-	6.73305	6.77978	9.67782	0.00186506	0.432824	up	4	0	39	0	0	0	0	0	0	0	5.82419	1.67959	9.64491	1.67959	1.67959	1.67959	1.67959	1.67959	1.67959	1.67959	chr8	93929156	93966792	-	hsa_circ_0005643	circBase	NM_001171795	TRIQK	exonic	238
chr2:201721405-201726585-	6.71139	6.76322	9.56845	0.0019795	0.432824	up	23	10	11	13	0	0	0	0	0	0	8.27874	6.98501	7.83356	7.48566	1.67959	1.67959	1.67959	1.67959	1.67959	1.67959	chr2	201721404	201726585	-	hsa_circ_0118604	circBase	NM_004071	CLK1	exonic	1057
chr2:29149571-29150391+	6.71075	6.76244	9.55273	0.00199652	0.432824	up	0	0	41	0	0	0	0	0	0	0	1.67959	1.67959	9.71678	1.67959	1.67959	1.67959	1.67959	1.67959	1.67959	1.67959	chr2	29149570	29150391	+		novel	ENST00000466067	WDR43	intronic	821
chr14:97299804-97304154+	6.70559	6.7588	9.53892	0.0020116	0.432824	up	0	0	0	0	59	0	0	0	0	0	1.67959	1.67959	1.67959	1.67959	9.69718	1.67959	1.67959	1.67959	1.67959	1.67959	chr14	97299803	97304154	+		PMID:25242744	NM_003384	VRK1	exonic	221
chr14:35522484-35522657+	6.69946	6.75371	9.49136	0.00206441	0.432824	up	0	0	38	4	0	0	0	0	0	0	1.67959	1.67959	9.60759	5.84211	1.67959	1.67959	1.67959	1.67959	1.67959	1.67959	chr14	35522483	35522657	+		novel	NM_173607	FAM177A1	exonic	174
chr7:74616841-74618329-	6.68748	6.74443	9.42496	0.00214052	0.432824	up	0	0	39	2	0	0	0	0	0	0	1.67959	1.67959	9.64491	4.9205	1.67959	1.67959	1.67959	1.67959	1.67959	1.67959	chr7	74616840	74618329	-	hsa_circ_0005958	circBase	NR_002206	GTF2IP1	exonic	256
chr6:149997396-150001593-	6.67504	6.73528	9.37088	0.0022046	0.432824	up	3	0	2	0	52	0	0	0	0	0	5.43609	1.67959	5.46253	1.67959	9.51573	1.67959	1.67959	1.67959	1.67959	1.67959	chr6	149997395	150001593	-	hsa_circ_0078224	circBase	NM_004690	LATS1	exonic	873
chr16:23113640-23119504-	6.66924	6.73083	9.33931	0.0022429	0.432824	up	17	23	7	4	7	0	0	0	0	0	7.84788	8.16587	7.19301	5.84211	6.66267	1.67959	1.67959	1.67959	1.67959	1.67959	chr16	23113639	23119504	-	hsa_circ_0008498	circBase	NM_020718	USP31	exonic	601
chr7:6852607-6854476-	6.64671	6.71306	9.20408	0.00241477	0.432824	up	3	2	36	0	0	0	0	0	0	0	5.43609	4.80209	9.52991	1.67959	1.67959	1.67959	1.67959	1.67959	1.67959	1.67959	chr7	6852606	6854476	-		novel	NM_198097	CCZ1B	exonic	144
chr1:186380943-186386786+	6.64497	6.71217	9.20611	0.00241208	0.432824	up	15	4	9	9	17	0	0	0	0	0	7.66998	5.71679	7.54855	6.96656	7.91569	1.67959	1.67959	1.67959	1.67959	1.67959	chr1	186380942	186386786	+	hsa_circ_0111536	circBase	NM_017847	C1orf27	sense overlapping	5844
chr10:70056643-70066663-	6.63106	6.70167	9.13423	0.00250871	0.432824	up	0	0	0	0	56	0	0	0	0	0	1.67959	1.67959	1.67959	1.67959	9.62219	1.67959	1.67959	1.67959	1.67959	1.67959	chr10	70056642	70066663	-	hsa_circ_0093926	circBase	ENST00000309049	PBLD	exonic	246
chr15:30766559-30771396+	6.62406	6.69636	9.09716	0.00256007	0.432824	up	6	18	3	7	23	0	0	0	0	0	6.3817	7.8167	6.01213	6.61451	8.34679	1.67959	1.67959	1.67959	1.67959	1.67959	chr15	30766558	30771396	+	hsa_circ_0008353	circBase	ENST00000399971	CTD-3092A11.1	exonic	500
chr4:184567641-184572480-	6.60533	6.68212	8.99743	0.0027036	0.432824	up	0	0	0	0	55	0	0	0	0	0	1.67959	1.67959	1.67959	1.67959	9.5963	1.67959	1.67959	1.67959	1.67959	1.67959	chr4	184567640	184572480	-	hsa_circ_0071501	circBase	NM_152682	RWDD4	exonic	426
chr7:72604106-72605594+	6.60201	6.67878	8.96354	0.00275421	0.432824	up	0	0	38	0	0	0	0	0	0	0	1.67959	1.67959	9.60759	1.67959	1.67959	1.67959	1.67959	1.67959	1.67959	1.67959	chr7	72604105	72605594	+	hsa_circ_0002656	circBase	NR_003580	GTF2IP4	exonic	256
chr1:235954999-235956912-	6.58003	6.66295	8.86413	0.00290829	0.432824	up	1	0	1	11	41	0	0	0	0	0	4.05022	1.67959	4.56371	7.24934	9.17453	1.67959	1.67959	1.67959	1.67959	1.67959	chr1	235954998	235956912	-	hsa_circ_0017091	circBase	NM_000081	LYST	exonic	537
chr7:618893-647089-	6.56625	6.65251	8.79137	0.00302658	0.432824	up	14	28	8	4	0	0	0	0	0	0	7.57207	8.44679	7.3817	5.84211	1.67959	1.67959	1.67959	1.67959	1.67959	1.67959	chr7	618892	647089	-	hsa_circ_0079040	circBase	NM_002735	PRKAR1B	exonic	451
chr10:11893996-11894214+	6.56296	6.64988	8.77179	0.00305925	0.432824	up	18	17	12	4	0	0	0	0	0	0	7.92923	7.73544	7.9574	5.84211	1.67959	1.67959	1.67959	1.67959	1.67959	1.67959	chr10	11893995	11894214	+	hsa_circ_0092823	circBase	NM_153256	PROSER2	exonic	219
chr2:20507739-20527139-	6.55246	6.64219	8.72089	0.00314584	0.432824	up	0	0	0	0	53	0	0	0	0	0	1.67959	1.67959	1.67959	1.67959	9.54309	1.67959	1.67959	1.67959	1.67959	1.67959	chr2	20507738	20527139	-	hsa_circ_0052867	circBase	NM_015317	PUM2	exonic	901
chr2:61566486-61566816-	6.53988	6.633	8.66013	0.00325247	0.432824	up	0	54	0	5	0	0	0	0	0	0	1.67959	9.38793	1.67959	6.14783	1.67959	1.67959	1.67959	1.67959	1.67959	1.67959	chr2	61566485	61566816	-	hsa_circ_0120631	circBase	NM_014709	USP34	exonic	244
chr9:92008477-92017931-	6.53145	6.62596	8.60555	0.00335139	0.432824	up	29	0	17	0	0	0	0	0	0	0	8.61008	1.67959	8.45442	1.67959	1.67959	1.67959	1.67959	1.67959	1.67959	1.67959	chr9	92008476	92017931	-	hsa_circ_0139316	circBase	NM_006378	SEMA4D	exonic	402
chr4:16289334-16290668+	6.52528	6.62181	8.58113	0.00339664	0.432824	up	0	0	0	0	52	0	0	0	0	0	1.67959	1.67959	1.67959	1.67959	9.51573	1.67959	1.67959	1.67959	1.67959	1.67959	chr4	16289333	16290668	+		novel	ENST00000573950	TAPT1-AS1	sense overlapping	1335
chr15:50303042-50339661-	6.52403	6.61977	8.55831	0.00343948	0.432824	up	3	0	34	0	0	0	0	0	0	0	5.43609	1.67959	9.44782	1.67959	1.67959	1.67959	1.67959	1.67959	1.67959	1.67959	chr15	50303041	50339661	-	hsa_circ_0103740	circBase	NM_024837	ATP8B4	exonic	348
chr7:138954140-138957186+	6.49758	6.60113	8.44037	0.00366982	0.432824	up	0	0	0	0	51	0	0	0	0	0	1.67959	1.67959	1.67959	1.67959	9.48784	1.67959	1.67959	1.67959	1.67959	1.67959	chr7	138954139	138957186	+	hsa_circ_0082647	circBase	NM_173569	UBN2	exonic	249
chr1:172011149-172062015+	6.49758	6.60113	8.44037	0.00366982	0.432824	up	0	0	0	0	51	0	0	0	0	0	1.67959	1.67959	1.67959	1.67959	9.48784	1.67959	1.67959	1.67959	1.67959	1.67959	chr1	172011148	172062015	+		novel	NM_015569	DNM3	exonic	553
chr5:70757644-70759944+	6.4948	6.59888	8.42389	0.00370322	0.432824	up	8	0	6	12	23	0	0	0	0	0	6.78281	1.67959	6.97588	7.37233	8.34679	1.67959	1.67959	1.67959	1.67959	1.67959	chr5	70757643	70759944	+	hsa_circ_0129463	circBase	NM_018429	BDP1	exonic	170
chr12:89853415-89866052-	6.48261	7.51348	12.2549	0.000464045	0.432824	up	4	0	67	11	0	0	0	1	0	0	5.82419	1.67959	10.4232	7.24934	1.67959	1.67959	1.67959	3.39273	1.67959	1.67959	chr12	89853414	89866052	-	hsa_circ_0099436	circBase	NM_172240	POC1B	exonic	661
chr7:100279695-100279858-	6.46934	6.58015	8.29858	0.00396761	0.432824	up	0	0	0	0	50	0	0	0	0	0	1.67959	1.67959	1.67959	1.67959	9.4594	1.67959	1.67959	1.67959	1.67959	1.67959	chr7	100279694	100279858	-	hsa_circ_0006271	circBase	NM_022574	GIGYF1	exonic	164
chr5:138614016-138614818-	6.46778	6.57797	8.27804	0.00401274	0.432824	up	13	0	26	0	0	0	0	0	0	0	7.46702	1.67959	9.06283	1.67959	1.67959	1.67959	1.67959	1.67959	1.67959	1.67959	chr5	138614015	138614818	-		novel	ENST00000508744	SIL1	intronic	803
chr16:16205232-16205439+	6.46673	6.57802	8.28343	0.00400084	0.432824	up	14	1	6	0	27	0	0	0	0	0	7.57207	3.95891	6.97588	1.67959	8.57601	1.67959	1.67959	1.67959	1.67959	1.67959	chr16	16205231	16205439	+	hsa_circ_0038138	circBase	NM_004996	ABCC1	exonic	208
chr3:37125127-37190529-	6.46469	6.57613	8.26925	0.00403221	0.432824	up	27	0	16	1	0	0	0	0	0	0	8.50786	1.67959	8.36778	4.06556	1.67959	1.67959	1.67959	1.67959	1.67959	1.67959	chr3	37125126	37190529	-		novel	NM_006309	LRRFIP2	exonic	1333
chr6:160109182-160113738-	6.443	6.55917	8.15763	0.00428805	0.432824	up	0	0	34	0	0	0	0	0	0	0	1.67959	1.67959	9.44782	1.67959	1.67959	1.67959	1.67959	1.67959	1.67959	1.67959	chr6	160109181	160113738	-		novel	NM_000636	SOD2	sense overlapping	4557
chrX:67494580-67518938-	6.41303	6.53822	8.03269	0.00459407	0.432824	up	20	11	12	2	0	0	0	0	0	0	8.07934	7.11919	7.9574	4.9205	1.67959	1.67959	1.67959	1.67959	1.67959	1.67959	chrX	67494579	67518938	-	hsa_circ_0140513	circBase	NM_002547	OPHN1	exonic	230
chr17:64509454-64510841+	6.40035	6.52766	7.96081	0.00478011	0.432824	up	0	0	33	0	0	0	0	0	0	0	1.67959	1.67959	9.40495	1.67959	1.67959	1.67959	1.67959	1.67959	1.67959	1.67959	chr17	64509453	64510841	+		novel	ENST00000284384	PRKCA	intronic	1388
chr9:88211277-88248289-	6.40035	6.52766	7.96081	0.00478011	0.432824	up	0	0	33	0	0	0	0	0	0	0	1.67959	1.67959	9.40495	1.67959	1.67959	1.67959	1.67959	1.67959	1.67959	1.67959	chr9	88211276	88248289	-	hsa_circ_0007162	circBase	NM_015239	AGTPBP1	exonic	1121
chr21:38792601-38794168-	6.39659	7.43559	11.6298	0.000649025	0.432824	up	49	0	28	18	0	0	0	1	0	0	9.36197	1.67959	9.16913	7.94797	1.67959	1.67959	1.67959	3.39273	1.67959	1.67959	chr21	38792600	38794168	-		novel	NM_001396	DYRK1A	antisense	1568
chr1:186375215-186381025+	6.38345	6.51529	7.88403	0.00498734	0.432824	up	0	1	32	0	0	0	0	0	0	0	1.67959	3.95891	9.36077	1.67959	1.67959	1.67959	1.67959	1.67959	1.67959	1.67959	chr1	186375214	186381025	+	hsa_circ_0111529	circBase	ENST00000478571	C1orf27	exonic	269
chrY:2590668-2594414+	6.38114	6.51532	7.89183	0.00496585	0.432824	up	0	0	0	0	47	0	0	0	0	0	1.67959	1.67959	1.67959	1.67959	9.37055	1.67959	1.67959	1.67959	1.67959	1.67959	chrY	2590667	2594414	+		novel	NM_002414	CD99	exonic	213
chr11:17190224-17191353-	6.35639	6.49545	7.76077	0.00533931	0.432824	up	0	0	32	0	0	0	0	0	0	0	1.67959	1.67959	9.36077	1.67959	1.67959	1.67959	1.67959	1.67959	1.67959	1.67959	chr11	17190223	17191353	-	hsa_circ_0003577	circBase	uc001mmr.3	PIK3C2A	exonic	1130
chr19:39100236-39100665-	6.35059	6.49227	7.74518	0.0053856	0.432824	up	24	0	16	0	0	0	0	0	0	0	8.33952	1.67959	8.36778	1.67959	1.67959	1.67959	1.67959	1.67959	1.67959	1.67959	chr19	39100235	39100665	-	hsa_circ_0050873	circBase	NM_007181	MAP4K1	exonic	196
chr8:67383665-67386173+	6.32981	6.47787	7.65849	0.00565057	0.432824	up	12	22	8	3	0	0	0	0	0	0	7.35372	8.10247	7.3817	5.45368	1.67959	1.67959	1.67959	1.67959	1.67959	1.67959	chr8	67383664	67386173	+	hsa_circ_0002562	circBase	ENST00000482608	C8orf46	intronic	2509
chr12:66597494-66611015+	6.32828	6.47561	7.64038	0.00570759	0.432824	up	5	5	23	3	0	0	0	0	0	0	6.12971	6.02104	8.88708	5.45368	1.67959	1.67959	1.67959	1.67959	1.67959	1.67959	chr12	66597493	66611015	+	hsa_circ_0006798	circBase	NM_007199	IRAK3	sense overlapping	13522
chr7:139459056-139469986-	6.31918	6.47043	7.61323	0.00579415	0.432824	up	0	0	0	0	45	0	0	0	0	0	1.67959	1.67959	1.67959	1.67959	9.30812	1.67959	1.67959	1.67959	1.67959	1.67959	chr7	139459055	139469986	-		novel	NM_001113239	HIPK2	intronic	10931
chr1:84644860-84701047+	6.30062	6.45713	7.53135	0.00606346	0.432824	up	0	5	0	0	40	0	0	0	0	0	1.67959	6.02104	1.67959	1.67959	9.13911	1.67959	1.67959	1.67959	1.67959	1.67959	chr1	84644859	84701047	+	hsa_circ_0114307	circBase	NM_182948	PRKACB	sense overlapping	56188
chr3:152132730-152165562+	6.29196	6.45068	7.49083	0.00620138	0.432824	up	4	0	3	0	36	0	0	0	0	0	5.82419	1.67959	6.01213	1.67959	8.98802	1.67959	1.67959	1.67959	1.67959	1.67959	chr3	152132729	152165562	+	hsa_circ_0122407	circBase	NM_021038	MBNL1	exonic	787
chr2:197653928-197657876-	6.28986	6.44865	7.47677	0.00625	0.432824	up	25	0	12	3	0	0	0	0	0	0	8.39784	1.67959	7.9574	5.45368	1.67959	1.67959	1.67959	1.67959	1.67959	1.67959	chr2	197653927	197657876	-	hsa_circ_0057602	circBase	NM_012086	GTF3C3	exonic	679
chr7:80375243-80375409-	6.28941	6.44818	7.47337	0.00626181	0.432824	up	25	0	14	0	0	0	0	0	0	0	8.39784	1.67959	8.17713	1.67959	1.67959	1.67959	1.67959	1.67959	1.67959	1.67959	chr7	80375242	80375409	-		novel	ENST00000419255	SEMA3C	intronic	167
chr2:135694411-135700244+	6.28504	6.44591	7.46213	0.00630102	0.432824	up	0	0	0	2	42	0	0	0	0	0	1.67959	1.67959	1.67959	4.9205	9.20911	1.67959	1.67959	1.67959	1.67959	1.67959	chr2	135694410	135700244	+	hsa_circ_0056537	circBase	NM_001241	CCNT2	exonic	253
chr3:56694759-56707753-	6.26567	6.43031	7.36123	0.00666451	0.432824	up	0	0	24	9	0	0	0	0	0	0	1.67959	1.67959	8.94807	6.96656	1.67959	1.67959	1.67959	1.67959	1.67959	1.67959	chr3	56694758	56707753	-	hsa_circ_0001315	circBase	NM_001112736	FAM208A	exonic	1037	acute lymphoblastic leukemia (ALL), acute myeloid leukemia (AML), bladder cancer, breast cancer, cardiac hypertrophy, cervical cancer, chronic lymphocytic leukemia (CLL), colorectal cancer, endometrial cancer, epithelial ovarian cancer (EOC), glioblastoma, hepatocellular carcinoma (HCC), kidney cancer, lung cancer, malignant melanoma, neuroblastoma (NB), non-alcoholic fatty liver disease (NAFLD),…
chr13:21955573-21957148-	6.26428	6.42882	7.35071	0.00670363	0.432824	up	0	0	30	0	0	0	0	0	0	0	1.67959	1.67959	9.26813	1.67959	1.67959	1.67959	1.67959	1.67959	1.67959	1.67959	chr13	21955572	21957148	-	hsa_circ_0100054	circBase	NM_153251	ZDHHC20	exonic	203
chr2:48692076-48692781+	6.26428	6.42882	7.35071	0.00670363	0.432824	up	0	0	30	0	0	0	0	0	0	0	1.67959	1.67959	9.26813	1.67959	1.67959	1.67959	1.67959	1.67959	1.67959	1.67959	chr2	48692075	48692781	+		novel	NM_152994	PPP1R21	exonic	203
chr2:202163468-202164023-	6.24809	6.41728	7.28043	0.00697097	0.432824	up	1	0	29	0	0	0	0	0	0	0	4.05022	1.67959	9.21948	1.67959	1.67959	1.67959	1.67959	1.67959	1.67959	1.67959	chr2	202163467	202164023	-		novel	NR_110620	ALS2CR12	sense overlapping	556
chr13:99171497-99171727-	6.23717	6.41168	7.25192	0.00708254	0.432824	up	7	0	3	16	16	0	0	0	0	0	6.59615	1.67959	6.01213	7.78038	7.82942	1.67959	1.67959	1.67959	1.67959	1.67959	chr13	99171496	99171727	-		novel	NM_003576	STK24	exonic	231
chr4:110434903-110442782+	6.22096	6.40035	7.1831	0.00735933	0.432824	up	0	0	0	0	42	0	0	0	0	0	1.67959	1.67959	1.67959	1.67959	9.20911	1.67959	1.67959	1.67959	1.67959	1.67959	chr4	110434902	110442782	+		novel	NM_006323	SEC24B	exonic	605
chr16:70346512-70351491+	6.21593	6.39432	7.1405	0.0075362	0.432824	up	0	0	29	0	0	0	0	0	0	0	1.67959	1.67959	9.21948	1.67959	1.67959	1.67959	1.67959	1.67959	1.67959	1.67959	chr16	70346511	70351491	+		novel	NM_007242	DDX19B	exonic	332
chr1:32384571-32385259-	6.21593	6.39432	7.1405	0.0075362	0.432824	up	0	0	29	0	0	0	0	0	0	0	1.67959	1.67959	9.21948	1.67959	1.67959	1.67959	1.67959	1.67959	1.67959	1.67959	chr1	32384570	32385259	-	hsa_circ_0011338	circBase	NM_080391	PTP4A2	exonic	689
chr18:59739906-59770135-	6.20651	6.39034	7.1226	0.00761183	0.432824	up	0	0	0	43	0	0	0	0	0	0	1.67959	1.67959	1.67959	9.19339	1.67959	1.67959	1.67959	1.67959	1.67959	1.67959	chr18	59739905	59770135	-		novel	NM_012327	PIGN	exonic	813
chr4:7008359-7016284+	6.20637	6.38943	7.11516	0.00764348	0.432824	up	12	9	10	8	0	0	0	0	0	0	7.35372	6.83705	7.69808	6.80125	1.67959	1.67959	1.67959	1.67959	1.67959	1.67959	chr4	7008358	7016284	+	hsa_circ_0126868	circBase	NM_020773	TBC1D14	exonic	406
chr5:154245002-154247352+	6.20482	6.38826	7.10792	0.00767442	0.432824	up	5	22	12	0	0	0	0	0	0	0	6.12971	8.10247	7.9574	1.67959	1.67959	1.67959	1.67959	1.67959	1.67959	1.67959	chr5	154245001	154247352	+	hsa_circ_0128395	circBase	NM_001301075	CNOT8	intronic	2351
chr6:20480077-20483180+	6.2047	6.38953	7.11873	0.00762825	0.432824	up	0	47	0	0	0	0	0	0	0	0	1.67959	9.18866	1.67959	1.67959	1.67959	1.67959	1.67959	1.67959	1.67959	1.67959	chr6	20480076	20483180	+		PMID:25070500	NM_001949	E2F3	sense overlapping	3104
chr6:34574332-34614575-	6.19701	6.38176	7.06628	0.00785483	0.432824	up	4	1	20	8	0	0	0	0	0	0	5.82419	3.95891	8.68691	6.80125	1.67959	1.67959	1.67959	1.67959	1.67959	1.67959	chr6	34574331	34614575	-	hsa_circ_0009095	circBase	NM_024294	C6orf106	exonic	548
chr4:48512076-48517292-	6.18767	6.376	7.0331	0.00800169	0.432824	up	17	3	12	5	0	0	0	0	0	0	7.84788	5.33075	7.9574	6.14783	1.67959	1.67959	1.67959	1.67959	1.67959	1.67959	chr4	48512075	48517292	-	hsa_circ_0126533	circBase	NM_015030	FRYL	exonic	705
chr11:77033407-77033586-	6.18668	6.37621	7.03634	0.0079872	0.432824	up	0	0	0	0	41	0	0	0	0	0	1.67959	1.67959	1.67959	1.67959	9.17453	1.67959	1.67959	1.67959	1.67959	1.67959	chr11	77033406	77033586	-		novel	NM_002576	PAK1	sense overlapping	180
chr13:101039023-101039354+	6.17686	6.3695	6.996	0.00816921	0.432824	up	0	11	0	0	31	0	0	0	0	0	1.67959	7.11919	1.67959	1.67959	8.77375	1.67959	1.67959	1.67959	1.67959	1.67959	chr13	101039022	101039354	+		novel	ENST00000413170	PCCA	intronic	332
chr4:39878613-39878773-	6.15953	6.35622	6.91344	0.00855501	0.432824	up	24	0	12	0	0	0	0	0	0	0	8.33952	1.67959	7.9574	1.67959	1.67959	1.67959	1.67959	1.67959	1.67959	1.67959	chr4	39878612	39878773	-		novel	NM_001100399	PDS5A	exonic	161
chr4:2659530-2661781+	6.15809	6.35633	6.91621	0.00854177	0.432824	up	0	7	0	0	34	0	0	0	0	0	1.67959	6.48599	1.67959	1.67959	8.90609	1.67959	1.67959	1.67959	1.67959	1.67959	chr4	2659529	2661781	+	hsa_circ_0068925	circBase	NM_003704	FAM193A	exonic	434
chr9:17457522-17487064+	6.15038	6.35085	6.88293	0.00870228	0.432824	up	0	0	0	1	39	0	0	0	0	0	1.67959	1.67959	1.67959	4.06556	9.10279	1.67959	1.67959	1.67959	1.67959	1.67959	chr9	17457521	17487064	+	hsa_circ_0138355	circBase	NM_017738	CNTLN	exonic	1005
chr10:6533645-6540520-	6.14676	6.34824	6.86698	0.00878029	0.432824	up	4	11	3	0	22	0	0	0	0	0	5.82419	7.11919	6.01213	1.67959	8.2833	1.67959	1.67959	1.67959	1.67959	1.67959	chr10	6533644	6540520	-		novel	NM_006257	PRKCQ	exonic	411
chr11:85685751-85742653-	6.14592	6.34596	6.85019	0.00886318	0.432824	up	0	0	18	4	10	0	0	0	0	0	1.67959	1.67959	8.53615	5.84211	7.16349	1.67959	1.67959	1.67959	1.67959	1.67959	chr11	85685750	85742653	-	hsa_circ_0023891	circBase	NM_007166	PICALM	exonic	1814
chr7:151873276-151875095-	6.12507	6.33296	6.77469	0.00924594	0.432824	up	9	20	7	3	0	0	0	0	0	0	6.94807	7.96665	7.19301	5.45368	1.67959	1.67959	1.67959	1.67959	1.67959	1.67959	chr7	151873275	151875095	-	hsa_circ_0082993	circBase	NM_170606	KMT2C	exonic	1820
chr2:9484661-9515073+	6.11555	6.3267	6.73756	0.00944035	0.432824	up	0	0	0	0	39	0	0	0	0	0	1.67959	1.67959	1.67959	1.67959	9.10279	1.67959	1.67959	1.67959	1.67959	1.67959	chr2	9484660	9515073	+		novel	NM_003887	ASAP2	exonic	897
chr2:208841375-208842310-	6.11555	6.3267	6.73756	0.00944035	0.432824	up	0	0	0	0	39	0	0	0	0	0	1.67959	1.67959	1.67959	1.67959	9.10279	1.67959	1.67959	1.67959	1.67959	1.67959	chr2	208841374	208842310	-	hsa_circ_0001095	circBase	NM_001080475	PLEKHM3	exonic	936	Cerebellar neurodegeneration, Waldenstrom Macroglobulinemia (WM), breast cancer, cardiac hypertrophy, cardiomyopathy, colorectal cancer, coronary artery disease, heart failure, hepatocellular carcinoma (HCC), lung cancer, myeloproliferative disorder, myocardial infarction, ovarian cancer (OC), retinitis pigmentosa (RP), rhabdomyosarcoma, schizophrenia
chr1:150997991-151001420+	6.11412	6.32276	6.70929	0.00959117	0.432824	up	0	0	27	0	0	0	0	0	0	0	1.67959	1.67959	9.11696	1.67959	1.67959	1.67959	1.67959	1.67959	1.67959	1.67959	chr1	150997990	151001420	+	hsa_circ_0014087	circBase	NM_021222	PRUNE	exonic	413
chr2:48555380-48555841+	6.11412	6.32276	6.70929	0.00959117	0.432824	up	0	0	27	0	0	0	0	0	0	0	1.67959	1.67959	9.11696	1.67959	1.67959	1.67959	1.67959	1.67959	1.67959	1.67959	chr2	48555379	48555841	+		novel	ENST00000413569	FOXN2	intronic	462
chr8:68015272-68066371+	6.11073	6.32233	6.70977	0.0095886	0.432824	up	17	0	11	7	0	0	0	0	0	0	7.84788	1.67959	7.83356	6.61451	1.67959	1.67959	1.67959	1.67959	1.67959	1.67959	chr8	68015271	68066371	+	hsa_circ_0084671	circBase	NM_024790	CSPP1	exonic	1276
chr15:57407923-57409561+	6.07944	6.29917	6.5692	0.0103759	0.432824	up	0	0	23	5	0	0	0	0	0	0	1.67959	1.67959	8.88708	6.14783	1.67959	1.67959	1.67959	1.67959	1.67959	1.67959	chr15	57407922	57409561	+		novel	ENST00000452095	TCF12	intronic	1639
chr12:111916874-111948386-	6.07863	6.30128	6.58549	0.0102814	0.432824	up	0	0	0	0	38	0	0	0	0	0	1.67959	1.67959	1.67959	1.67959	9.06554	1.67959	1.67959	1.67959	1.67959	1.67959	chr12	111916873	111948386	-		novel	NM_002973	ATXN2	sense overlapping	31513
chr1:93697983-93698150+	6.07863	6.30128	6.58549	0.0102814	0.432824	up	0	0	0	0	38	0	0	0	0	0	1.67959	1.67959	1.67959	1.67959	9.06554	1.67959	1.67959	1.67959	1.67959	1.67959	chr1	93697982	93698150	+		novel	NM_206886	CCDC18	exonic	168
chr18:3163231-3164437-	6.07828	6.30184	6.58992	0.0102558	0.432824	up	0	43	0	0	0	0	0	0	0	0	1.67959	9.06107	1.67959	1.67959	1.67959	1.67959	1.67959	1.67959	1.67959	1.67959	chr18	3163230	3164437	-		novel	NM_003803	MYOM1	sense overlapping	1207
chr2:120634899-120643458+	6.0774	6.30044	6.58046	0.0103104	0.432824	up	0	0	0	1	37	0	0	0	0	0	1.67959	1.67959	1.67959	4.06556	9.0273	1.67959	1.67959	1.67959	1.67959	1.67959	chr2	120634898	120643458	+	hsa_circ_0117153	circBase	NM_002830	PTPN4	exonic	429
chr3:136183723-136197217-	6.07212	6.29571	6.55073	0.0104841	0.432824	up	23	0	11	0	0	0	0	0	0	0	8.27874	1.67959	7.83356	1.67959	1.67959	1.67959	1.67959	1.67959	1.67959	1.67959	chr3	136183722	136197217	-		novel	NM_005862	STAG1	sense overlapping	13495
chr15:23333849-23339028-	6.0604	6.28562	6.48812	0.0108598	0.432824	up	0	0	26	0	0	0	0	0	0	0	1.67959	1.67959	9.06283	1.67959	1.67959	1.67959	1.67959	1.67959	1.67959	1.67959	chr15	23333848	23339028	-	hsa_circ_0004978	circBase	NR_002824	HERC2P2	exonic	602
chr18:18586312-18603641-	6.0604	6.28562	6.48812	0.0108598	0.432824	up	0	0	26	0	0	0	0	0	0	0	1.67959	1.67959	9.06283	1.67959	1.67959	1.67959	1.67959	1.67959	1.67959	1.67959	chr18	18586311	18603641	-		novel	NM_005406	ROCK1	exonic	674
chr10:53445439-53448382+	6.05253	6.28304	6.47633	0.010932	0.432824	up	8	0	4	3	21	0	0	0	0	0	6.78281	1.67959	6.40915	5.45368	8.21689	1.67959	1.67959	1.67959	1.67959	1.67959	chr10	53445438	53448382	+		novel	ENST00000373976	PRKG1	intronic	2944
chr3:184675162-184689540+	6.04486	6.27905	6.45419	0.0110691	0.432824	up	0	42	0	0	0	0	0	0	0	0	1.67959	9.02733	1.67959	1.67959	1.67959	1.67959	1.67959	1.67959	1.67959	1.67959	chr3	184675161	184689540	+	hsa_circ_0068379	circBase	NM_015303	VPS8	exonic	385
chr5:142168995-142172338+	6.04074	6.27542	6.43158	0.0112109	0.432824	up	0	0	0	0	37	0	0	0	0	0	1.67959	1.67959	1.67959	1.67959	9.0273	1.67959	1.67959	1.67959	1.67959	1.67959	chr5	142168994	142172338	+		novel	NM_001135608	ARHGAP26	intronic	3344
chr8:96046236-96087980+	6.04074	6.27542	6.43158	0.0112109	0.432824	up	0	0	0	0	37	0	0	0	0	0	1.67959	1.67959	1.67959	1.67959	9.0273	1.67959	1.67959	1.67959	1.67959	1.67959	chr8	96046235	96087980	+		novel	NM_152416	NDUFAF6	sense overlapping	41745
chr5:30513885-30514041+	6.04074	6.27542	6.43158	0.0112109	0.432824	up	0	0	0	0	37	0	0	0	0	0	1.67959	1.67959	1.67959	1.67959	9.0273	1.67959	1.67959	1.67959	1.67959	1.67959	chr5	30513884	30514041	+		novel	T280409	G065184	antisense	157
chr2:55481177-55489563-	6.04074	6.27542	6.43158	0.0112109	0.432824	up	0	0	0	0	37	0	0	0	0	0	1.67959	1.67959	1.67959	1.67959	9.0273	1.67959	1.67959	1.67959	1.67959	1.67959	chr2	55481176	55489563	-		novel	NM_002453	MTIF2	exonic	445
chr3:133293883-133305566+	6.039	6.27424	6.4246	0.0112551	0.432824	up	1	0	0	0	36	0	0	0	0	0	4.05022	1.67959	1.67959	1.67959	8.98802	1.67959	1.67959	1.67959	1.67959	1.67959	chr3	133293882	133305566	+		novel	NM_017548	CDV3	exonic	386
chr4:106127405-106129857+	6.03725	6.27306	6.41761	0.0112994	0.432824	up	2	0	0	0	35	0	0	0	0	0	4.90353	1.67959	1.67959	1.67959	8.94763	1.67959	1.67959	1.67959	1.67959	1.67959	chr4	106127404	106129857	+		novel	ENST00000265149	TET2	intronic	2453
chr2:11389787-11393479-	6.03579	6.27084	6.40303	0.0113926	0.432824	up	22	0	11	0	0	0	0	0	0	0	8.21529	1.67959	7.83356	1.67959	1.67959	1.67959	1.67959	1.67959	1.67959	1.67959	chr2	11389786	11393479	-		novel	NM_004850	ROCK2	sense overlapping	3693
chr9:115030329-115060196-	6.03039	6.26844	6.39025	0.0114749	0.432824	up	3	0	0	4	30	0	0	0	0	0	5.43609	1.67959	1.67959	5.84211	8.7268	1.67959	1.67959	1.67959	1.67959	1.67959	chr9	115030328	115060196	-	hsa_circ_0003500	circBase	NM_005156	PTBP3	exonic	393
chr22:36712562-36714370-	6.02669	6.26497	6.36867	0.0116153	0.432824	up	22	3	9	0	0	0	0	0	0	0	8.21529	5.33075	7.54855	1.67959	1.67959	1.67959	1.67959	1.67959	1.67959	1.67959	chr22	36712561	36714370	-	hsa_circ_0009004	circBase	NM_002473	MYH9	exonic	272
chr8:74585342-74601048+	6.01493	6.25651	6.31819	0.0119506	0.432824	up	19	1	12	0	0	0	0	0	0	0	8.00624	3.95891	7.9574	1.67959	1.67959	1.67959	1.67959	1.67959	1.67959	1.67959	chr8	74585341	74601048	+		novel	ENST00000533978	RP11-463D19.1	sense overlapping	15707
chr1:161071838-161072165+	6.01064	6.2559	6.31701	0.0119585	0.432824	up	0	41	0	0	0	0	0	0	0	0	1.67959	8.99278	1.67959	1.67959	1.67959	1.67959	1.67959	1.67959	1.67959	1.67959	chr1	161071837	161072165	+		novel	NM_012394	PFDN2	antisense	328
chr12:30809618-30822216-	6.00461	6.24751	6.26312	0.0123277	0.432824	up	0	0	25	0	0	0	0	0	0	0	1.67959	1.67959	9.00659	1.67959	1.67959	1.67959	1.67959	1.67959	1.67959	1.67959	chr12	30809617	30822216	-		novel	NM_006390	IPO8	exonic	904
chr4:129913322-130003528-	6.00183	6.24908	6.27581	0.0122397	0.432824	up	0	0	0	0	36	0	0	0	0	0	1.67959	1.67959	1.67959	1.67959	8.98802	1.67959	1.67959	1.67959	1.67959	1.67959	chr4	129913321	130003528	-	hsa_circ_0070962	circBase	NM_144643	SCLT1	exonic	652
chr4:2659530-2665015+	6.00183	6.24908	6.27581	0.0122397	0.432824	up	0	0	0	0	36	0	0	0	0	0	1.67959	1.67959	1.67959	1.67959	8.98802	1.67959	1.67959	1.67959	1.67959	1.67959	chr4	2659529	2665015	+	hsa_circ_0126080	circBase	NM_003704	FAM193A	exonic	768
chr5:158621724-158630664-	5.99955	6.24682	6.26181	0.0123368	0.432824	up	24	0	7	2	1	0	0	0	0	0	8.33952	1.67959	7.19301	4.9205	4.10593	1.67959	1.67959	1.67959	1.67959	1.67959	chr5	158621723	158630664	-	hsa_circ_0074828	circBase	NM_144726	RNF145	exonic	332
chr15:64496640-64497148-	5.99791	6.24646	6.26038	0.0123468	0.432824	up	0	0	0	3	33	0	0	0	0	0	1.67959	1.67959	1.67959	5.45368	8.86331	1.67959	1.67959	1.67959	1.67959	1.67959	chr15	64496639	64497148	-	hsa_circ_0035828	circBase	NM_022048	CSNK1G1	exonic	234
chr5:77711344-77717784+	5.99387	6.24241	6.23525	0.0125232	0.432824	up	17	2	11	2	0	0	0	0	0	0	7.84788	4.80209	7.83356	4.9205	1.67959	1.67959	1.67959	1.67959	1.67959	1.67959	chr5	77711343	77717784	+	hsa_circ_0002186	circBase	NM_004866	SCAMP1	exonic	497
chr1:8555123-8601377-	5.9932	6.24326	6.2415	0.0124791	0.432824	up	1	5	1	1	28	0	0	0	0	0	4.05022	6.02104	4.56371	4.06556	8.62804	1.67959	1.67959	1.67959	1.67959	1.67959	chr1	8555122	8601377	-	hsa_circ_0009581	circBase	NM_012102	RERE	exonic	379
chr2:33525518-33572577+	5.99271	6.24199	6.23312	0.0125383	0.432824	up	17	0	8	0	8	0	0	0	0	0	7.84788	1.67959	7.3817	1.67959	6.8496	1.67959	1.67959	1.67959	1.67959	1.67959	chr2	33525517	33572577	+	hsa_circ_0119870	circBase	NM_000627	LTBP1	exonic	765
chr13:53007797-53009017-	5.98412	6.23625	6.20156	0.0127638	0.432824	up	13	0	8	12	0	0	0	0	0	0	7.46702	1.67959	7.3817	7.37233	1.67959	1.67959	1.67959	1.67959	1.67959	1.67959	chr13	53007796	53009017	-	hsa_circ_0100740	circBase	NM_016075	VPS36	exonic	177
chr4:54265897-54294350-	5.98316	6.23549	6.19758	0.0127925	0.432824	up	11	12	10	0	0	0	0	0	0	0	7.23075	7.24195	7.69808	1.67959	1.67959	1.67959	1.67959	1.67959	1.67959	1.67959	chr4	54265896	54294350	-		novel	NM_030917	FIP1L1	antisense	28454
chr2:68794477-68805135+	5.96375	6.22209	6.12908	0.0132976	0.432824	up	13	0	11	7	0	0	0	0	0	0	7.46702	1.67959	7.83356	6.61451	1.67959	1.67959	1.67959	1.67959	1.67959	1.67959	chr2	68794476	68805135	+		novel	NM_173545	APLF	sense overlapping	10659
chr2:86378420-86386794-	5.96184	6.22225	6.13111	0.0132824	0.432824	up	0	0	0	0	35	0	0	0	0	0	1.67959	1.67959	1.67959	1.67959	8.94763	1.67959	1.67959	1.67959	1.67959	1.67959	chr2	86378419	86386794	-		novel	NM_006839	IMMT	exonic	505
chr15:35219236-35231014-	5.96184	6.22225	6.13111	0.0132824	0.432824	up	0	0	0	0	35	0	0	0	0	0	1.67959	1.67959	1.67959	1.67959	8.94763	1.67959	1.67959	1.67959	1.67959	1.67959	chr15	35219235	35231014	-	hsa_circ_0103353	circBase	NM_014691	AQR	exonic	477
chr10:20531999-20534434+	5.96184	6.22225	6.13111	0.0132824	0.432824	up	0	0	0	0	35	0	0	0	0	0	1.67959	1.67959	1.67959	1.67959	8.94763	1.67959	1.67959	1.67959	1.67959	1.67959	chr10	20531998	20534434	+		novel	NM_032812	PLXDC2	sense overlapping	2436
chr17:27861136-27861318+	5.96184	6.22225	6.13111	0.0132824	0.432824	up	0	0	0	0	35	0	0	0	0	0	1.67959	1.67959	1.67959	1.67959	8.94763	1.67959	1.67959	1.67959	1.67959	1.67959	chr17	27861135	27861318	+		PMID:25242744	NM_020791	TAOK1	exonic	183
chr6:90045021-90053475-	5.9605	6.22136	6.12658	0.0133164	0.432824	up	0	0	0	1	34	0	0	0	0	0	1.67959	1.67959	1.67959	4.06556	8.90609	1.67959	1.67959	1.67959	1.67959	1.67959	chr6	90045020	90053475	-	hsa_circ_0077304	circBase	NM_016021	UBE2J1	exonic	527
chr1:33097428-33099711-	5.95781	6.21958	6.11753	0.0133848	0.432824	up	0	0	0	3	32	0	0	0	0	0	1.67959	1.67959	1.67959	5.45368	8.81923	1.67959	1.67959	1.67959	1.67959	1.67959	chr1	33097427	33099711	-	hsa_circ_0113063	circBase	NM_001308138	ZBTB8OS	exonic	296
chr2:32698180-32702651+	5.92764	6.19918	6.01325	0.0141989	0.432824	up	7	12	5	10	0	0	0	0	0	0	6.59615	7.24195	6.72017	7.11487	1.67959	1.67959	1.67959	1.67959	1.67959	1.67959	chr2	32698179	32702651	+	hsa_circ_0119816	circBase	NM_016252	BIRC6	exonic	476
chr2:48036297-48050499-	5.92182	6.19377	5.9845	0.0144321	0.432824	up	16	0	13	0	0	0	0	0	0	0	7.76167	1.67959	8.07145	1.67959	1.67959	1.67959	1.67959	1.67959	1.67959	1.67959	chr2	48036296	48050499	-		novel	NM_025133	FBXO11	exonic	1157
chr15:41988273-41991357+	5.9208	6.19413	5.9871	0.0144108	0.432824	up	15	1	7	9	0	0	0	0	0	0	7.66998	3.95891	7.19301	6.96656	1.67959	1.67959	1.67959	1.67959	1.67959	1.67959	chr15	41988272	41991357	+	hsa_circ_0000592	circBase	NM_001080541	MGA	exonic	1124	Duchenne muscular dystrophy (DMD), autism spectrum disorder (ASD), breast cancer, uveal melanoma
chr5:109976592-109978072-	5.92071	6.19491	5.99173	0.0143731	0.432824	up	0	0	0	0	34	0	0	0	0	0	1.67959	1.67959	1.67959	1.67959	8.90609	1.67959	1.67959	1.67959	1.67959	1.67959	chr5	109976591	109978072	-	hsa_circ_0127563	circBase	NM_001039763	TMEM232	exonic	218
chr6:133013362-133015321-	5.92071	6.19491	5.99173	0.0143731	0.432824	up	0	0	0	0	34	0	0	0	0	0	1.67959	1.67959	1.67959	1.67959	8.90609	1.67959	1.67959	1.67959	1.67959	1.67959	chr6	133013361	133015321	-		novel	NM_004666	VNN1	exonic	847
chr3:114219199-114221711-	5.92071	6.19491	5.99173	0.0143731	0.432824	up	0	0	0	0	34	0	0	0	0	0	1.67959	1.67959	1.67959	1.67959	8.90609	1.67959	1.67959	1.67959	1.67959	1.67959	chr3	114219198	114221711	-		novel	ENST00000470556	ZBTB20	exonic	107
chr12:49333438-49334971-	5.92044	6.1941	5.98713	0.0144106	0.432824	up	13	13	7	0	0	0	0	0	0	0	7.46702	7.35508	7.19301	1.67959	1.67959	1.67959	1.67959	1.67959	1.67959	1.67959	chr12	49333437	49334971	-	hsa_circ_0003770	circBase	NM_001659	ARF3	exonic	477
chr1:21231376-21268190-	5.92002	6.19327	5.9825	0.0144485	0.432824	up	22	0	9	0	0	0	0	0	0	0	8.21529	1.67959	7.54855	1.67959	1.67959	1.67959	1.67959	1.67959	1.67959	1.67959	chr1	21231375	21268190	-		novel	NM_003760	EIF4G3	sense overlapping	36815
chr17:42501717-42552271-	5.91631	6.19129	5.97272	0.0145289	0.432824	up	7	0	5	0	20	0	0	0	0	0	6.59615	1.67959	6.72017	1.67959	8.14728	1.67959	1.67959	1.67959	1.67959	1.67959	chr17	42501716	42552271	-	hsa_circ_0044079	circBase	NM_001002909	GPATCH8	exonic	447
chr3:122081815-122084313-	5.91193	6.18938	5.96367	0.0146036	0.432824	up	1	10	0	0	24	0	0	0	0	0	4.05022	6.98501	1.67959	1.67959	8.4076	1.67959	1.67959	1.67959	1.67959	1.67959	chr3	122081814	122084313	-	hsa_circ_0006560	circBase	ENST00000466854	CCDC58	exonic	191
chr2:171862657-171867964-	5.90682	6.18488	5.93994	0.0148015	0.432824	up	13	11	8	0	0	0	0	0	0	0	7.46702	7.11919	7.3817	1.67959	1.67959	1.67959	1.67959	1.67959	1.67959	1.67959	chr2	171862656	171867964	-	hsa_circ_0057023	circBase	NM_012290	TLK1	exonic	570
chr3:15258932-15262488+	5.90507	6.18483	5.94046	0.0147972	0.432824	up	3	13	1	5	13	0	0	0	0	0	5.43609	7.35508	4.56371	6.14783	7.53454	1.67959	1.67959	1.67959	1.67959	1.67959	chr3	15258931	15262488	+	hsa_circ_0122412	circBase	NM_014296	CAPN7	exonic	427
chr1:21268578-21276601-	5.90289	6.18413	5.93739	0.0148229	0.432824	up	0	38	0	0	0	0	0	0	0	0	1.67959	8.88387	1.67959	1.67959	1.67959	1.67959	1.67959	1.67959	1.67959	1.67959	chr1	21268577	21276601	-		novel	NM_003760	EIF4G3	sense overlapping	8024
chr1:39900086-39905172+	5.90289	6.18413	5.93739	0.0148229	0.432824	up	0	38	0	0	0	0	0	0	0	0	1.67959	8.88387	1.67959	1.67959	1.67959	1.67959	1.67959	1.67959	1.67959	1.67959	chr1	39900085	39905172	+	hsa_circ_0005788	circBase	NM_012090	MACF1	exonic	891
chr11:68369331-68370960+	5.9013	6.18034	5.91611	0.015003	0.432824	up	17	0	12	0	0	0	0	0	0	0	7.84788	1.67959	7.9574	1.67959	1.67959	1.67959	1.67959	1.67959	1.67959	1.67959	chr11	68369330	68370960	+	hsa_circ_0002417	circBase	NM_018312	PPP6R3	exonic	258
chr15:67892985-67946360+	5.88599	6.16816	5.85262	0.0155539	0.432824	up	0	0	23	0	0	0	0	0	0	0	1.67959	1.67959	8.88708	1.67959	1.67959	1.67959	1.67959	1.67959	1.67959	1.67959	chr15	67892984	67946360	+	hsa_circ_0104349	circBase	NM_002757	MAP2K5	sense overlapping	53376
chr15:25665803-25667108-	5.88599	6.16816	5.85262	0.0155539	0.432824	up	0	0	23	0	0	0	0	0	0	0	1.67959	1.67959	8.88708	1.67959	1.67959	1.67959	1.67959	1.67959	1.67959	1.67959	chr15	25665802	25667108	-		novel	ENST00000566215	UBE3A	intronic	1306
chr2:101902543-101911643-	5.87838	6.16705	5.84944	0.015582	0.432824	up	0	0	0	0	33	0	0	0	0	0	1.67959	1.67959	1.67959	1.67959	8.86331	1.67959	1.67959	1.67959	1.67959	1.67959	chr2	101902542	101911643	-	hsa_circ_0055905	circBase	NM_173647	RNF149	exonic	500
chr5:66187843-66188026+	5.87838	6.16705	5.84944	0.015582	0.432824	up	0	0	0	0	33	0	0	0	0	0	1.67959	1.67959	1.67959	1.67959	8.86331	1.67959	1.67959	1.67959	1.67959	1.67959	chr5	66187842	66188026	+		novel	ENST00000404260	MAST4	intronic	184
chr12:27538414-27543172+	5.87838	6.16705	5.84944	0.015582	0.432824	up	0	0	0	0	33	0	0	0	0	0	1.67959	1.67959	1.67959	1.67959	8.86331	1.67959	1.67959	1.67959	1.67959	1.67959	chr12	27538413	27543172	+	hsa_circ_0098265	circBase	NM_020183	ARNTL2	exonic	435
chr12:112572542-112572870+	5.86547	6.15479	5.78446	0.0161685	0.432824	up	0	0	22	1	0	0	0	0	0	0	1.67959	1.67959	8.82339	4.06556	1.67959	1.67959	1.67959	1.67959	1.67959	1.67959	chr12	112572541	112572870	+	hsa_circ_0028347	circBase	NM_006700	TRAFD1	exonic	190
chr1:1747195-1749314-	5.8651	6.15939	5.8109	0.0159271	0.432824	up	0	37	0	0	0	0	0	0	0	0	1.67959	8.84566	1.67959	1.67959	1.67959	1.67959	1.67959	1.67959	1.67959	1.67959	chr1	1747194	1749314	-	hsa_circ_0009360	circBase	NM_002074	GNB1	exonic	146
chr18:18547713-18549169-	5.86031	6.15334	5.77826	0.0162256	0.432824	up	16	0	12	0	0	0	0	0	0	0	7.76167	1.67959	7.9574	1.67959	1.67959	1.67959	1.67959	1.67959	1.67959	1.67959	chr18	18547712	18549169	-		novel	NM_005406	ROCK1	exonic	372
chr6:47544260-47577040+	5.85939	6.15313	5.77738	0.0162337	0.432824	up	19	0	10	0	0	0	0	0	0	0	8.00624	1.67959	7.69808	1.67959	1.67959	1.67959	1.67959	1.67959	1.67959	1.67959	chr6	47544259	47577040	+		novel	NM_012120	CD2AP	exonic	1085
chr9:2181571-2192802+	5.85901	6.15326	5.77828	0.0162254	0.432824	up	21	0	8	1	0	0	0	0	0	0	8.14891	1.67959	7.3817	4.06556	1.67959	1.67959	1.67959	1.67959	1.67959	1.67959	chr9	2181570	2192802	+	hsa_circ_0138496	circBase	NM_003070	SMARCA2	sense overlapping	11232
chr5:137342679-137347634-	5.85823	6.154	5.78279	0.0161839	0.432824	up	0	4	0	0	29	0	0	0	0	0	1.67959	5.71679	1.67959	1.67959	8.67827	1.67959	1.67959	1.67959	1.67959	1.67959	chr5	137342678	137347634	-	hsa_circ_0004894	circBase	NM_016603	FAM13B	exonic	478
chr1:52896685-52901137-	5.8389	6.13955	5.70786	0.0168891	0.432824	up	17	0	11	0	0	0	0	0	0	0	7.84788	1.67959	7.83356	1.67959	1.67959	1.67959	1.67959	1.67959	1.67959	1.67959	chr1	52896684	52901137	-	hsa_circ_0012533	circBase	NM_015269	ZCCHC11	exonic	549
chr5:80932376-80946158-	5.83797	6.13934	5.70702	0.0168972	0.432824	up	20	0	9	0	0	0	0	0	0	0	8.07934	1.67959	7.54855	1.67959	1.67959	1.67959	1.67959	1.67959	1.67959	1.67959	chr5	80932375	80946158	-	hsa_circ_0129840	circBase	NM_012446	SSBP2	exonic	135
chr7:151902191-151904510-	5.83717	6.13973	5.70949	0.0168734	0.432824	up	6	0	3	0	22	0	0	0	0	0	6.3817	1.67959	6.01213	1.67959	8.2833	1.67959	1.67959	1.67959	1.67959	1.67959	chr7	151902190	151904510	-		novel	NM_170606	KMT2C	sense overlapping	2320
chr18:39575854-39607512+	5.83476	6.13863	5.70412	0.0169251	0.432824	up	0	0	0	0	32	0	0	0	0	0	1.67959	1.67959	1.67959	1.67959	8.81923	1.67959	1.67959	1.67959	1.67959	1.67959	chr18	39575853	39607512	+		novel	NM_002647	PIK3C3	exonic	804
chr14:21968637-21970045-	5.83476	6.13863	5.70412	0.0169251	0.432824	up	0	0	0	0	32	0	0	0	0	0	1.67959	1.67959	1.67959	1.67959	8.81923	1.67959	1.67959	1.67959	1.67959	1.67959	chr14	21968636	21970045	-	hsa_circ_0005957	circBase	NM_019852	METTL3	exonic	581
chr17:79532531-79539114-	5.8338	6.13736	5.69727	0.0169914	0.432824	up	8	9	6	8	0	0	0	0	0	0	6.78281	6.83705	6.97588	6.80125	1.67959	1.67959	1.67959	1.67959	1.67959	1.67959	chr17	79532530	79539114	-	hsa_circ_0107772	circBase	NM_017921	NPLOC4	exonic	388
chr3:185332352-185335399+	5.8263	6.13421	5.68203	0.0171396	0.432824	up	0	36	0	0	0	0	0	0	0	0	1.67959	8.80641	1.67959	1.67959	1.67959	1.67959	1.67959	1.67959	1.67959	1.67959	chr3	185332351	185335399	+		novel	NM_021627	SENP2	exonic	309
chr14:103130128-103148315+	5.82426	6.12855	5.65088	0.0174466	0.432824	up	0	0	18	6	0	0	0	0	0	0	1.67959	1.67959	8.53615	6.39996	1.67959	1.67959	1.67959	1.67959	1.67959	1.67959	chr14	103130127	103148315	+		novel	NM_015156	RCOR1	sense overlapping	18188
chrX:12817326-12828265+	5.82283	6.12681	5.64155	0.0175397	0.432824	up	0	0	22	0	0	0	0	0	0	0	1.67959	1.67959	8.82339	1.67959	1.67959	1.67959	1.67959	1.67959	1.67959	1.67959	chrX	12817325	12828265	+	hsa_circ_0139738	circBase	NM_002765	PRPS2	exonic	408
chr20:9211417-9281320+	5.82283	6.12681	5.64155	0.0175397	0.432824	up	0	0	22	0	0	0	0	0	0	0	1.67959	1.67959	8.82339	1.67959	1.67959	1.67959	1.67959	1.67959	1.67959	1.67959	chr20	9211416	9281320	+		novel	ENST00000334005	PLCB4	intronic	69904
chr19:10279006-10288043+	5.81842	6.12736	5.64606	0.0174946	0.432824	up	3	0	4	0	23	0	0	0	0	0	5.43609	1.67959	6.40915	1.67959	8.34679	1.67959	1.67959	1.67959	1.67959	1.67959	chr19	10279005	10288043	+		novel	NM_001379	DNMT1	antisense	9038
chr6:91260187-91281526-	5.81813	6.12867	5.65352	0.0174204	0.432824	up	2	32	1	0	0	0	0	0	0	0	4.90353	8.63778	4.56371	1.67959	1.67959	1.67959	1.67959	1.67959	1.67959	1.67959	chr6	91260186	91281526	-	hsa_circ_0077391	circBase	NM_003188	MAP3K7	exonic	829
chr20:45912315-45927616-	5.81718	6.12563	5.63678	0.0175875	0.432824	up	18	0	10	0	0	0	0	0	0	0	7.92923	1.67959	7.69808	1.67959	1.67959	1.67959	1.67959	1.67959	1.67959	1.67959	chr20	45912314	45927616	-		novel	NM_183048	ZMYND8	exonic	573
chr5:88100415-88119732-	5.80276	6.11783	5.59755	0.0179857	0.432824	up	2	0	1	2	26	0	0	0	0	0	4.90353	1.67959	4.56371	4.9205	8.52203	1.67959	1.67959	1.67959	1.67959	1.67959	chr5	88100414	88119732	-		novel	NM_002397	MEF2C	sense overlapping	19318
chr13:79945080-79946065-	5.79942	6.11509	5.58321	0.0181334	0.432824	up	12	6	6	6	0	0	0	0	0	0	7.35372	6.27216	6.97588	6.39996	1.67959	1.67959	1.67959	1.67959	1.67959	1.67959	chr13	79945079	79946065	-	hsa_circ_0004205	circBase	NM_022118	RBM26	exonic	307
chr2:173349510-173362828+	5.79513	6.1116	5.56501	0.0183229	0.432824	up	19	0	9	0	0	0	0	0	0	0	8.00624	1.67959	7.54855	1.67959	1.67959	1.67959	1.67959	1.67959	1.67959	1.67959	chr2	173349509	173362828	+		novel	NM_000210	ITGA6	exonic	1565
chr7:151828341-151828668-	5.78979	6.10965	5.55568	0.0184208	0.432824	up	0	0	0	0	31	0	0	0	0	0	1.67959	1.67959	1.67959	1.67959	8.77375	1.67959	1.67959	1.67959	1.67959	1.67959	chr7	151828340	151828668	-		novel	GSE61474_TCONS_00302885	GSE61474_XLOC_057663	antisense	328
chr16:57242987-57250085+	5.78979	6.10965	5.55568	0.0184208	0.432824	up	0	0	0	0	31	0	0	0	0	0	1.67959	1.67959	1.67959	1.67959	8.77375	1.67959	1.67959	1.67959	1.67959	1.67959	chr16	57242986	57250085	+	hsa_circ_0105650	circBase	NM_133368	RSPRY1	exonic	366
chr21:34950605-34954361-	5.78979	6.10965	5.55568	0.0184208	0.432824	up	0	0	0	0	31	0	0	0	0	0	1.67959	1.67959	1.67959	1.67959	8.77375	1.67959	1.67959	1.67959	1.67959	1.67959	chr21	34950604	34954361	-	hsa_circ_0115856	circBase	uc002ysi.1	DONSON	exonic	663
chr2:20202224-20202398+	5.78979	6.10965	5.55568	0.0184208	0.432824	up	0	0	0	0	31	0	0	0	0	0	1.67959	1.67959	1.67959	1.67959	8.77375	1.67959	1.67959	1.67959	1.67959	1.67959	chr2	20202223	20202398	+		novel	NR_110235	LOC101928222	intronic	175
chr1:225306922-225311316+	5.78979	6.10965	5.55568	0.0184208	0.432824	up	0	0	0	0	31	0	0	0	0	0	1.67959	1.67959	1.67959	1.67959	8.77375	1.67959	1.67959	1.67959	1.67959	1.67959	chr1	225306921	225311316	+	hsa_circ_0112200	circBase	ENST00000328556	DNAH14	exonic	163
chr17:27977672-27999147-	5.78828	6.10869	5.55077	0.0184725	0.432824	up	0	0	0	1	30	0	0	0	0	0	1.67959	1.67959	1.67959	4.06556	8.7268	1.67959	1.67959	1.67959	1.67959	1.67959	chr17	27977671	27999147	-	hsa_circ_0106505	circBase	NM_033389	SSH2	exonic	612
chr1:44666214-44667115-	5.78642	6.10859	5.5507	0.0184733	0.432824	up	0	35	0	0	0	0	0	0	0	0	1.67959	8.76607	1.67959	1.67959	1.67959	1.67959	1.67959	1.67959	1.67959	1.67959	chr1	44666213	44667115	-		novel	T009738	G002070	sense overlapping	902
chr3:131181593-131190123-	5.77275	6.09743	5.49254	0.0190977	0.432824	up	20	0	8	0	0	0	0	0	0	0	8.07934	1.67959	7.3817	1.67959	1.67959	1.67959	1.67959	1.67959	1.67959	1.67959	chr3	131181592	131190123	-	hsa_circ_0121907	circBase	NM_007208	MRPL3	sense overlapping	8531
chr8:131191510-131193126-	5.77149	6.09757	5.49361	0.0190861	0.432824	up	5	2	3	8	12	0	0	0	0	0	6.12971	4.80209	6.01213	6.80125	7.42114	1.67959	1.67959	1.67959	1.67959	1.67959	chr8	131191509	131193126	-	hsa_circ_0135743	circBase	NM_018482	ASAP1	exonic	216
chr5:108373123-108436220+	5.76297	6.09309	5.47101	0.0193345	0.432824	up	2	29	2	0	0	0	0	0	0	0	4.90353	8.49696	5.46253	1.67959	1.67959	1.67959	1.67959	1.67959	1.67959	1.67959	chr5	108373122	108436220	+	hsa_circ_0073529	circBase	NM_005246	FER	exonic	392
chr17:30267305-30315516+	5.7568	6.08425	5.42393	0.0198626	0.432824	up	0	0	21	0	0	0	0	0	0	0	1.67959	1.67959	8.75676	1.67959	1.67959	1.67959	1.67959	1.67959	1.67959	1.67959	chr17	30267304	30315516	+	hsa_circ_0042967	circBase	NM_015355	SUZ12	exonic	927
chr20:18190072-18190855-	5.75195	6.08346	5.42068	0.0198997	0.432824	up	15	0	11	0	0	0	0	0	0	0	7.66998	1.67959	7.83356	1.67959	1.67959	1.67959	1.67959	1.67959	1.67959	1.67959	chr20	18190071	18190855	-		novel	T214390	G049572	sense overlapping	784
chr16:18847255-18856973-	5.75195	6.08346	5.42068	0.0198997	0.432824	up	15	0	11	0	0	0	0	0	0	0	7.66998	1.67959	7.83356	1.67959	1.67959	1.67959	1.67959	1.67959	1.67959	1.67959	chr16	18847254	18856973	-	hsa_circ_0038264	circBase	NM_015092	SMG1	exonic	2061
chr18:19345733-19348713+	5.75066	6.08523	5.43065	0.0197863	0.432824	up	0	15	0	3	14	0	0	0	0	0	1.67959	7.55776	1.67959	5.45368	7.63968	1.67959	1.67959	1.67959	1.67959	1.67959	chr18	19345732	19348713	+	hsa_circ_0047096	circBase	NM_020774	MIB1	exonic	302
chr4:37847254-37850272+	5.74862	6.08285	5.4181	0.019929	0.432824	up	4	0	3	1	21	0	0	0	0	0	5.82419	1.67959	6.01213	4.06556	8.21689	1.67959	1.67959	1.67959	1.67959	1.67959	chr4	37847253	37850272	+	hsa_circ_0069410	circBase	NM_018290	PGM2	exonic	503
chr15:59970110-59974713-	5.7454	6.0825	5.41685	0.0199433	0.432824	up	0	34	0	0	0	0	0	0	0	0	1.67959	8.72456	1.67959	1.67959	1.67959	1.67959	1.67959	1.67959	1.67959	1.67959	chr15	59970109	59974713	-	hsa_circ_0104036	circBase	NM_004330	BNIP2	exonic	529
chr1:169806068-169819468+	5.74336	6.08007	5.40402	0.0200905	0.432824	up	0	0	0	0	30	0	0	0	0	0	1.67959	1.67959	1.67959	1.67959	8.7268	1.67959	1.67959	1.67959	1.67959	1.67959	chr1	169806067	169819468	+	hsa_circ_0111113	circBase	ENST00000498289	C1orf112	exonic	687
chr1:220191791-220203822-	5.74336	6.08007	5.40402	0.0200905	0.432824	up	0	0	0	0	30	0	0	0	0	0	1.67959	1.67959	1.67959	1.67959	8.7268	1.67959	1.67959	1.67959	1.67959	1.67959	chr1	220191790	220203822	-		novel	NM_004446	EPRS	exonic	966
chr20:24257268-24257446+	5.74336	6.08007	5.40402	0.0200905	0.432824	up	0	0	0	0	30	0	0	0	0	0	1.67959	1.67959	1.67959	1.67959	8.7268	1.67959	1.67959	1.67959	1.67959	1.67959	chr20	24257267	24257446	+		novel			intergenic	179
chr18:36053770-36053925+	5.74336	6.08007	5.40402	0.0200905	0.432824	up	0	0	0	0	30	0	0	0	0	0	1.67959	1.67959	1.67959	1.67959	8.7268	1.67959	1.67959	1.67959	1.67959	1.67959	chr18	36053769	36053925	+		novel	T161072	G037216	antisense	156
chr11:128993341-128997200-	5.7418	6.07909	5.399	0.0201483	0.432824	up	0	0	0	1	29	0	0	0	0	0	1.67959	1.67959	1.67959	4.06556	8.67827	1.67959	1.67959	1.67959	1.67959	1.67959	chr11	128993340	128997200	-	hsa_circ_0005027	circBase	NM_001142685	ARHGAP32	sense overlapping	3860
chr17:62130140-62130731+	5.73118	6.07333	5.36972	0.0204893	0.432824	up	0	26	0	7	0	0	0	0	0	0	1.67959	8.34089	1.67959	6.61451	1.67959	1.67959	1.67959	1.67959	1.67959	1.67959	chr17	62130139	62130731	+		novel	NM_001433	ERN1	antisense	592
chr5:132400672-132403249+	5.72946	6.06938	5.34858	0.0207391	0.432824	up	15	0	10	1	0	0	0	0	0	0	7.66998	1.67959	7.69808	4.06556	1.67959	1.67959	1.67959	1.67959	1.67959	1.67959	chr5	132400671	132403249	+	hsa_circ_0007802	circBase	NM_002154	HSPA4	exonic	199
chr8:143134160-143134326+	5.72887	6.06901	5.34669	0.0207617	0.432824	up	16	0	10	0	0	0	0	0	0	0	7.76167	1.67959	7.69808	1.67959	1.67959	1.67959	1.67959	1.67959	1.67959	1.67959	chr8	143134159	143134326	+		novel	T352838	G083321	antisense	167
chr15:41648237-41669502+	5.72326	6.06756	5.33986	0.0208431	0.432824	up	6	21	3	1	0	0	0	0	0	0	6.3817	8.03616	6.01213	4.06556	1.67959	1.67959	1.67959	1.67959	1.67959	1.67959	chr15	41648236	41669502	+	hsa_circ_0008346	circBase	NM_016359	NUSAP1	exonic	784
chr15:43440953-43441349+	5.70721	6.05842	5.29322	0.0214086	0.432824	up	0	32	0	1	0	0	0	0	0	0	1.67959	8.63778	1.67959	4.06556	1.67959	1.67959	1.67959	1.67959	1.67959	1.67959	chr15	43440952	43441349	+	hsa_circ_0034942	circBase	NM_024956	TMEM62	exonic	248
chr15:50935537-50941082-	5.70543	6.05443	5.27197	0.0216715	0.432824	up	17	0	9	0	0	0	0	0	0	0	7.84788	1.67959	7.54855	1.67959	1.67959	1.67959	1.67959	1.67959	1.67959	1.67959	chr15	50935536	50941082	-	hsa_circ_0035252	circBase	NM_017672	TRPM7	exonic	413
chr16:53262895-53276928+	5.70055	6.05187	5.25897	0.0218339	0.432824	up	13	2	7	5	0	0	0	0	0	0	7.46702	4.80209	7.19301	6.14783	1.67959	1.67959	1.67959	1.67959	1.67959	1.67959	chr16	53262894	53276928	+	hsa_circ_0039356	circBase	NM_025134	CHD9	exonic	886
chr15:72810408-72837305+	5.6994	6.05075	5.25311	0.0219075	0.432824	up	10	0	8	0	8	0	0	0	0	0	7.09632	1.67959	7.3817	1.67959	6.8496	1.67959	1.67959	1.67959	1.67959	1.67959	chr15	72810407	72837305	+	hsa_circ_0006314	circBase	NM_005744	ARIH1	exonic	213
chr2:219103387-219110269+	5.69539	6.04987	5.24901	0.0219592	0.432824	up	0	0	0	0	29	0	0	0	0	0	1.67959	1.67959	1.67959	1.67959	8.67827	1.67959	1.67959	1.67959	1.67959	1.67959	chr2	219103386	219110269	+	hsa_circ_0058213	circBase	NM_005731	ARPC2	exonic	408
chr12:77191214-77203637+	5.69539	6.04987	5.24901	0.0219592	0.432824	up	0	0	0	0	29	0	0	0	0	0	1.67959	1.67959	1.67959	1.67959	8.67827	1.67959	1.67959	1.67959	1.67959	1.67959	chr12	77191213	77203637	+		novel	NM_015336	ZDHHC17	exonic	450
chr4:108603171-108608333-	5.69539	6.04987	5.24901	0.0219592	0.432824	up	0	0	0	0	29	0	0	0	0	0	1.67959	1.67959	1.67959	1.67959	8.67827	1.67959	1.67959	1.67959	1.67959	1.67959	chr4	108603170	108608333	-	hsa_circ_0124987	circBase	NM_005443	PAPSS1	exonic	258
chr10:61592283-61612460-	5.69054	6.04688	5.23363	0.0221543	0.432824	up	0	0	0	3	26	0	0	0	0	0	1.67959	1.67959	1.67959	5.45368	8.52203	1.67959	1.67959	1.67959	1.67959	1.67959	chr10	61592282	61612460	-	hsa_circ_0093792	circBase	NM_005436	CCDC6	exonic	279
chr17:16004564-16005071-	5.68763	6.04042	5.19943	0.0225943	0.432824	up	0	0	20	0	0	0	0	0	0	0	1.67959	1.67959	8.68691	1.67959	1.67959	1.67959	1.67959	1.67959	1.67959	1.67959	chr17	16004563	16005071	-	hsa_circ_0106250	circBase	NM_006311	NCOR1	exonic	508
chr16:19627436-19663412+	5.68261	6.03983	5.19699	0.0226261	0.432824	up	15	0	10	0	0	0	0	0	0	0	7.66998	1.67959	7.69808	1.67959	1.67959	1.67959	1.67959	1.67959	1.67959	1.67959	chr16	19627435	19663412	+	hsa_circ_0005699	circBase	NM_020314	C16orf62	exonic	1198
chr1:236976038-236998987+	5.68261	6.03983	5.19699	0.0226261	0.432824	up	15	0	10	0	0	0	0	0	0	0	7.66998	1.67959	7.69808	1.67959	1.67959	1.67959	1.67959	1.67959	1.67959	1.67959	chr1	236976037	236998987	+		novel	NM_000254	MTR	exonic	827
chrX:10046839-10084547+	5.68261	6.03983	5.19699	0.0226261	0.432824	up	15	0	10	0	0	0	0	0	0	0	7.66998	1.67959	7.69808	1.67959	1.67959	1.67959	1.67959	1.67959	1.67959	1.67959	chrX	10046838	10084547	+		novel	NM_015691	WWC3	exonic	844
chr10:79764228-79764394-	5.68261	6.03983	5.19699	0.0226261	0.432824	up	15	0	10	0	0	0	0	0	0	0	7.66998	1.67959	7.69808	1.67959	1.67959	1.67959	1.67959	1.67959	1.67959	1.67959	chr10	79764227	79764394	-		novel	ENST00000472014	POLR3A	intronic	167
chr3:122180071-122186276-	5.67533	6.03783	5.18725	0.0227533	0.432824	up	0	5	0	25	0	0	0	0	0	0	1.67959	6.02104	1.67959	8.41665	1.67959	1.67959	1.67959	1.67959	1.67959	1.67959	chr3	122180070	122186276	-		PMID:25242744	NM_002264	KPNA1	exonic	303
chr3:43591212-43607219-	5.6738	6.03751	5.1857	0.0227736	0.432824	up	4	28	0	0	0	0	0	0	0	0	5.82419	8.44679	1.67959	1.67959	1.67959	1.67959	1.67959	1.67959	1.67959	1.67959	chr3	43591211	43607219	-	hsa_circ_0009084	circBase	NM_018075	ANO10	exonic	579
chr7:135255853-135258573+	5.66109	6.02714	5.13196	0.0234892	0.432824	up	13	0	7	6	0	0	0	0	0	0	7.46702	1.67959	7.19301	6.39996	1.67959	1.67959	1.67959	1.67959	1.67959	1.67959	chr7	135255852	135258573	+		novel	NM_015135	NUP205	exonic	315
chr12:51689580-51693498-	5.66025	6.02611	5.12655	0.0235625	0.432824	up	13	0	9	3	0	0	0	0	0	0	7.46702	1.67959	7.54855	5.45368	1.67959	1.67959	1.67959	1.67959	1.67959	1.67959	chr12	51689579	51693498	-		novel	NM_001290007	BIN2	exonic	353
chr1:62165947-62166697-	5.65968	6.02885	5.14121	0.0233643	0.432824	up	0	32	0	0	0	0	0	0	0	0	1.67959	8.63778	1.67959	1.67959	1.67959	1.67959	1.67959	1.67959	1.67959	1.67959	chr1	62165946	62166697	-		novel	NM_032027	TM2D1	sense overlapping	751
chr9:116046595-116050544+	5.65968	6.02885	5.14121	0.0233643	0.432824	up	0	32	0	0	0	0	0	0	0	0	1.67959	8.63778	1.67959	1.67959	1.67959	1.67959	1.67959	1.67959	1.67959	1.67959	chr9	116046594	116050544	+	hsa_circ_0137752	circBase	NM_004697	PRPF4	sense overlapping	3950
chr15:40938036-40939272+	5.65941	6.02507	5.12112	0.0236363	0.432824	up	13	0	11	0	0	0	0	0	0	0	7.46702	1.67959	7.83356	1.67959	1.67959	1.67959	1.67959	1.67959	1.67959	1.67959	chr15	40938035	40939272	+	hsa_circ_0103438	circBase	NM_144508	CASC5	sense overlapping	1237
chr1:22030755-22048257-	5.6584	6.02497	5.12069	0.0236422	0.432824	up	16	0	9	0	0	0	0	0	0	0	7.76167	1.67959	7.54855	1.67959	1.67959	1.67959	1.67959	1.67959	1.67959	1.67959	chr1	22030754	22048257	-	hsa_circ_0112035	circBase	NM_032236	USP48	exonic	867
chr3:15793257-15855816-	5.65528	6.02575	5.12519	0.023581	0.432824	up	1	27	1	2	0	0	0	0	0	0	4.05022	8.39481	4.56371	4.9205	1.67959	1.67959	1.67959	1.67959	1.67959	1.67959	chr3	15793256	15855816	-	hsa_circ_0122535	circBase	ENST00000439830	ANKRD28	exonic	304
chr6:80383331-80383516+	5.65012	6.02203	5.10595	0.0238439	0.432824	up	0	7	0	3	19	0	0	0	0	0	1.67959	6.48599	1.67959	5.45368	8.07414	1.67959	1.67959	1.67959	1.67959	1.67959	chr6	80383330	80383516	+		novel	NM_031469	SH3BGRL2	exonic	186
chrX:2326786-2343345-	5.64577	6.01903	5.09049	0.0240574	0.432824	up	0	0	0	0	28	0	0	0	0	0	1.67959	1.67959	1.67959	1.67959	8.62804	1.67959	1.67959	1.67959	1.67959	1.67959	chrX	2326785	2343345	-	hsa_circ_0002818	circBase	NM_145177	DHRSX	exonic	177
chrY:2276786-2293345-	5.64577	6.01903	5.09049	0.0240574	0.432824	up	0	0	0	0	28	0	0	0	0	0	1.67959	1.67959	1.67959	1.67959	8.62804	1.67959	1.67959	1.67959	1.67959	1.67959	chrY	2276785	2293345	-	hsa_circ_0004591	circBase	NM_145177	DHRSX	exonic	177
chr18:51686135-51690920-	5.64325	6.01734	5.08176	0.0241788	0.432824	up	6	0	2	20	0	0	0	0	0	0	6.3817	1.67959	5.46253	8.0981	1.67959	1.67959	1.67959	1.67959	1.67959	1.67959	chr18	51686134	51690920	-		novel	NM_003927	MBD2	sense overlapping	4786
chr13:20425495-20426330-	5.63778	6.01294	5.059	0.0244984	0.432824	up	12	0	6	8	0	0	0	0	0	0	7.35372	1.67959	6.97588	6.80125	1.67959	1.67959	1.67959	1.67959	1.67959	1.67959	chr13	20425494	20426330	-	hsa_circ_0002673	circBase	NM_001039649	ZMYM5	exonic	596
chr9:5123004-5126446+	5.63379	6.00996	5.04362	0.0247168	0.432824	up	17	0	8	0	0	0	0	0	0	0	7.84788	1.67959	7.3817	1.67959	1.67959	1.67959	1.67959	1.67959	1.67959	1.67959	chr9	5123003	5126446	+		novel	NM_004972	JAK2	exonic	232
chr7:77394812-77402631+	5.61537	5.99938	4.9893	0.0255045	0.432824	up	9	0	5	12	0	0	0	0	0	0	6.94807	1.67959	6.72017	7.37233	1.67959	1.67959	1.67959	1.67959	1.67959	1.67959	chr7	77394811	77402631	+	hsa_circ_0134707	circBase	NM_198467	RSBN1L	exonic	449
chr22:29105994-29108005-	5.615	5.99523	4.96758	0.0258267	0.432824	up	0	0	19	0	0	0	0	0	0	0	1.67959	1.67959	8.6135	1.67959	1.67959	1.67959	1.67959	1.67959	1.67959	1.67959	chr22	29105993	29108005	-		novel	NM_007194	CHEK2	exonic	163
chr4:103578839-103611928-	5.615	5.99523	4.96758	0.0258267	0.432824	up	0	0	19	0	0	0	0	0	0	0	1.67959	1.67959	8.6135	1.67959	1.67959	1.67959	1.67959	1.67959	1.67959	1.67959	chr4	103578838	103611928	-		novel	NM_005908	MANBA	exonic	1031
chr9:125827627-125852664+	5.61482	6.00126	4.9992	0.025359	0.432824	up	0	31	0	0	0	0	0	0	0	0	1.67959	8.59235	1.67959	1.67959	1.67959	1.67959	1.67959	1.67959	1.67959	1.67959	chr9	125827626	125852664	+	hsa_circ_0088408	circBase	NM_012197	RABGAP1	exonic	834
chr8:27605594-27622768-	5.61482	6.00126	4.9992	0.025359	0.432824	up	0	31	0	0	0	0	0	0	0	0	1.67959	8.59235	1.67959	1.67959	1.67959	1.67959	1.67959	1.67959	1.67959	1.67959	chr8	27605593	27622768	-		novel	NM_018246	CCDC25	exonic	523
chr6:108242133-108246136-	5.61482	6.00126	4.9992	0.025359	0.432824	up	0	31	0	0	0	0	0	0	0	0	1.67959	8.59235	1.67959	1.67959	1.67959	1.67959	1.67959	1.67959	1.67959	1.67959	chr6	108242132	108246136	-	hsa_circ_0130207	circBase	NM_007214	SEC63	sense overlapping	4004
chr1:98144651-98165103-	5.61298	5.99682	4.97602	0.025701	0.432824	up	10	0	9	5	0	0	0	0	0	0	7.09632	1.67959	7.54855	6.14783	1.67959	1.67959	1.67959	1.67959	1.67959	1.67959	chr1	98144650	98165103	-	hsa_circ_0004161	circBase	NM_000110	DPYD	exonic	367
chr2:228356263-228359649+	5.60979	5.99488	4.96605	0.0258496	0.432824	up	15	0	9	0	0	0	0	0	0	0	7.66998	1.67959	7.54855	1.67959	1.67959	1.67959	1.67959	1.67959	1.67959	1.67959	chr2	228356262	228359649	+	hsa_circ_0119264	circBase	NM_004504	AGFG1	sense overlapping	3387
chr11:43465606-43465759+	5.60979	5.99488	4.96605	0.0258496	0.432824	up	15	0	9	0	0	0	0	0	0	0	7.66998	1.67959	7.54855	1.67959	1.67959	1.67959	1.67959	1.67959	1.67959	1.67959	chr11	43465605	43465759	+		novel	NM_018259	TTC17	exonic	154
chr10:69748420-69773943-	5.60875	5.99481	4.96575	0.0258542	0.432824	up	18	0	7	0	0	0	0	0	0	0	7.92923	1.67959	7.19301	1.67959	1.67959	1.67959	1.67959	1.67959	1.67959	1.67959	chr10	69748419	69773943	-	hsa_circ_0018484	circBase	NM_015601	HERC4	exonic	898
chr4:39915231-39927553-	5.60671	5.99477	4.96561	0.0258561	0.432824	up	4	4	2	0	17	0	0	0	0	0	5.82419	5.71679	5.46253	1.67959	7.91569	1.67959	1.67959	1.67959	1.67959	1.67959	chr4	39915230	39927553	-	hsa_circ_0007308	circBase	NM_001100399	PDS5A	exonic	563
chr12:123106428-123107154+	5.60354	5.99211	4.95188	0.0260623	0.432824	up	12	8	6	0	0	0	0	0	0	0	7.35372	6.67217	6.97588	1.67959	1.67959	1.67959	1.67959	1.67959	1.67959	1.67959	chr12	123106427	123107154	+		novel	NM_014708	KNTC1	exonic	236
chr18:77170403-77171501+	5.59545	5.98807	4.93118	0.0263763	0.432824	up	2	0	1	10	14	0	0	0	0	0	4.90353	1.67959	4.56371	7.11487	7.63968	1.67959	1.67959	1.67959	1.67959	1.67959	chr18	77170402	77171501	+	hsa_circ_0048023	circBase	NM_006162	NFATC1	exonic	1099
chr5:36211946-36227667-	5.59438	5.98752	4.9283	0.0264202	0.432824	up	0	0	0	0	27	0	0	0	0	0	1.67959	1.67959	1.67959	1.67959	8.57601	1.67959	1.67959	1.67959	1.67959	1.67959	chr5	36211945	36227667	-	hsa_circ_0002292	circBase	NM_153013	NADK2	exonic	560
chr9:138741983-138758382-	5.59438	5.98752	4.9283	0.0264202	0.432824	up	0	0	0	0	27	0	0	0	0	0	1.67959	1.67959	1.67959	1.67959	8.57601	1.67959	1.67959	1.67959	1.67959	1.67959	chr9	138741982	138758382	-	hsa_circ_0089489	circBase	NM_015447	CAMSAP1	exonic	460
chr7:72040466-72040704-	5.59438	5.98752	4.9283	0.0264202	0.432824	up	0	0	0	0	27	0	0	0	0	0	1.67959	1.67959	1.67959	1.67959	8.57601	1.67959	1.67959	1.67959	1.67959	1.67959	chr7	72040465	72040704	-		novel	ENST00000438125	TYW1B	intronic	239
chr4:10728298-10728464-	5.59438	5.98752	4.9283	0.0264202	0.432824	up	0	0	0	0	27	0	0	0	0	0	1.67959	1.67959	1.67959	1.67959	8.57601	1.67959	1.67959	1.67959	1.67959	1.67959	chr4	10728297	10728464	-		novel	T261263	G060083	intronic	167
chr13:43537391-43538275-	5.58918	5.98439	4.91222	0.0266674	0.432824	up	0	0	0	3	24	0	0	0	0	0	1.67959	1.67959	1.67959	5.45368	8.4076	1.67959	1.67959	1.67959	1.67959	1.67959	chr13	43537390	43538275	-		novel	NM_033255	EPSTI1	exonic	158
chr22:32883732-32891517+	5.58433	5.97957	4.88731	0.0270548	0.432824	up	16	0	8	0	0	0	0	0	0	0	7.76167	1.67959	7.3817	1.67959	1.67959	1.67959	1.67959	1.67959	1.67959	1.67959	chr22	32883731	32891517	+	hsa_circ_0116483	circBase	NM_012179	FBXO7	exonic	395
chr20:43703659-43706602+	5.58433	5.97957	4.88731	0.0270548	0.432824	up	16	0	8	0	0	0	0	0	0	0	7.76167	1.67959	7.3817	1.67959	1.67959	1.67959	1.67959	1.67959	1.67959	1.67959	chr20	43703658	43706602	+		novel	NM_006282	STK4	sense overlapping	2944
chr15:50294350-50311173-	5.58396	5.98126	4.8961	0.0269174	0.432824	up	0	0	0	6	21	0	0	0	0	0	1.67959	1.67959	1.67959	6.39996	8.21689	1.67959	1.67959	1.67959	1.67959	1.67959	chr15	50294349	50311173	-		novel	NR_073596	ATP8B4	exonic	232
chr14:66082696-66083909+	5.58327	5.97952	4.88707	0.0270586	0.432824	up	19	0	6	0	0	0	0	0	0	0	8.00624	1.67959	6.97588	1.67959	1.67959	1.67959	1.67959	1.67959	1.67959	1.67959	chr14	66082695	66083909	+		novel	ENST00000358307	FUT8	exonic	381
chr2:15534351-15557836-	5.57749	5.97662	4.87217	0.0272932	0.432824	up	9	3	4	10	0	0	0	0	0	0	6.94807	5.33075	6.40915	7.11487	1.67959	1.67959	1.67959	1.67959	1.67959	1.67959	chr2	15534350	15557836	-	hsa_circ_0052750	circBase	NM_015909	NBAS	exonic	680
chr6:57188999-57190843+	5.56852	5.97313	4.85426	0.0275779	0.432824	up	0	30	0	0	0	0	0	0	0	0	1.67959	8.54544	1.67959	1.67959	1.67959	1.67959	1.67959	1.67959	1.67959	1.67959	chr6	57188998	57190843	+		novel	NM_000947	PRIM2	exonic	201
chr3:196089165-196089558-	5.56527	5.96881	4.83196	0.0279368	0.432824	up	8	0	5	12	0	0	0	0	0	0	6.78281	1.67959	6.72017	7.37233	1.67959	1.67959	1.67959	1.67959	1.67959	1.67959	chr3	196089164	196089558	-	hsa_circ_0068643	circBase	NM_015562	UBXN7	exonic	394
chr10:126628943-126631876+	5.56245	5.9679	4.82726	0.028013	0.432824	up	1	0	1	0	24	0	0	0	0	0	4.05022	1.67959	4.56371	1.67959	8.4076	1.67959	1.67959	1.67959	1.67959	1.67959	chr10	126628942	126631876	+	hsa_circ_0006545	circBase	NM_017580	ZRANB1	sense overlapping	2934
chr6:6182221-6182374-	5.55948	5.96415	4.80792	0.0283293	0.432824	up	14	0	9	0	0	0	0	0	0	0	7.57207	1.67959	7.54855	1.67959	1.67959	1.67959	1.67959	1.67959	1.67959	1.67959	chr6	6182220	6182374	-		novel	NM_000129	F13A1	exonic	154
chr4:106111517-106112092+	5.55948	5.96415	4.80792	0.0283293	0.432824	up	14	0	9	0	0	0	0	0	0	0	7.57207	1.67959	7.54855	1.67959	1.67959	1.67959	1.67959	1.67959	1.67959	1.67959	chr4	106111516	106112092	+		novel	ENST00000413648	TET2	intronic	576
chr14:55071090-55169298+	5.55841	5.96411	4.80775	0.0283321	0.432824	up	17	0	7	0	0	0	0	0	0	0	7.84788	1.67959	7.19301	1.67959	1.67959	1.67959	1.67959	1.67959	1.67959	1.67959	chr14	55071089	55169298	+	hsa_circ_0002202	circBase	NM_015589	SAMD4A	sense overlapping	98209
chr6:37342396-37344809+	5.55841	5.96411	4.80775	0.0283321	0.432824	up	17	0	7	0	0	0	0	0	0	0	7.84788	1.67959	7.19301	1.67959	1.67959	1.67959	1.67959	1.67959	1.67959	1.67959	chr6	37342395	37344809	+	hsa_circ_0076226	circBase	NM_003958	RNF8	exonic	198
chr15:80365608-80367657+	5.55487	5.96425	4.80848	0.0283201	0.432824	up	0	15	0	0	13	0	0	0	0	0	1.67959	7.55776	1.67959	1.67959	7.53454	1.67959	1.67959	1.67959	1.67959	1.67959	chr15	80365607	80367657	+		novel	NM_001242911	ZFAND6	intronic	2050
chr12:88490665-88502958-	5.5546	5.96183	4.796	0.0285258	0.432824	up	16	1	7	0	0	0	0	0	0	0	7.76167	3.95891	7.19301	1.67959	1.67959	1.67959	1.67959	1.67959	1.67959	1.67959	chr12	88490664	88502958	-		novel	NM_025114	CEP290	exonic	736
chr1:48860939-48865316-	5.54108	5.9553	4.7623	0.0290896	0.432824	up	0	0	0	0	26	0	0	0	0	0	1.67959	1.67959	1.67959	1.67959	8.52203	1.67959	1.67959	1.67959	1.67959	1.67959	chr1	48860938	48865316	-	hsa_circ_0113490	circBase	NM_019073	SPATA6	exonic	382
chr8:41543670-41548117-	5.54108	5.9553	4.7623	0.0290896	0.432824	up	0	0	0	0	26	0	0	0	0	0	1.67959	1.67959	1.67959	1.67959	8.52203	1.67959	1.67959	1.67959	1.67959	1.67959	chr8	41543669	41548117	-		novel	NM_000037	ANK1	exonic	532
chr19:11759173-11761232+	5.54108	5.9553	4.7623	0.0290896	0.432824	up	0	0	0	0	26	0	0	0	0	0	1.67959	1.67959	1.67959	1.67959	8.52203	1.67959	1.67959	1.67959	1.67959	1.67959	chr19	11759172	11761232	+		novel	ENST00000344893	ZNF833P	exonic	188
chr2:158607745-158675071-	5.53855	5.9486	4.72795	0.0296763	0.432824	up	0	0	18	0	0	0	0	0	0	0	1.67959	1.67959	8.53615	1.67959	1.67959	1.67959	1.67959	1.67959	1.67959	1.67959	chr2	158607744	158675071	-		novel	NM_001105	ACVR1	sense overlapping	67327
chr12:66597491-66641834+	5.53855	5.9486	4.72795	0.0296763	0.432824	up	0	0	18	0	0	0	0	0	0	0	1.67959	1.67959	8.53615	1.67959	1.67959	1.67959	1.67959	1.67959	1.67959	1.67959	chr12	66597490	66641834	+		novel	NM_007199	IRAK3	sense overlapping	44344
chr2:86992150-86993147+	5.53419	5.94854	4.72755	0.0296832	0.432824	up	12	0	10	0	0	0	0	0	0	0	7.35372	1.67959	7.69808	1.67959	1.67959	1.67959	1.67959	1.67959	1.67959	1.67959	chr2	86992149	86993147	+	hsa_circ_0121121	circBase	NM_022780	RMND5A	exonic	333
chr11:85979498-85988180+	5.53311	5.94852	4.72745	0.0296849	0.432824	up	15	0	8	0	0	0	0	0	0	0	7.66998	1.67959	7.3817	1.67959	1.67959	1.67959	1.67959	1.67959	1.67959	1.67959	chr11	85979497	85988180	+		novel	NM_003797	EED	exonic	265
chr16:304380-304680+	5.53311	5.94852	4.72745	0.0296849	0.432824	up	15	0	8	0	0	0	0	0	0	0	7.66998	1.67959	7.3817	1.67959	1.67959	1.67959	1.67959	1.67959	1.67959	1.67959	chr16	304379	304680	+	hsa_circ_0037146	circBase	NM_032039	ITFG3	exonic	301
chr1:211952260-211966532-	5.53311	5.94852	4.72745	0.0296849	0.432824	up	15	0	8	0	0	0	0	0	0	0	7.66998	1.67959	7.3817	1.67959	1.67959	1.67959	1.67959	1.67959	1.67959	1.67959	chr1	211952259	211966532	-	hsa_circ_0002274	circBase	NM_014873	LPGAT1	exonic	616
chr16:11980328-11981607-	5.52982	5.94982	4.73403	0.0295715	0.432824	up	0	27	0	2	0	0	0	0	0	0	1.67959	8.39481	1.67959	4.9205	1.67959	1.67959	1.67959	1.67959	1.67959	1.67959	chr16	11980327	11981607	-	hsa_circ_0105016	circBase	NM_002094	GSPT1	exonic	477
chr2:89100616-89104394+	5.52534	5.94391	4.70367	0.0300983	0.432824	up	13	2	8	0	0	0	0	0	0	0	7.46702	4.80209	7.3817	1.67959	1.67959	1.67959	1.67959	1.67959	1.67959	1.67959	chr2	89100615	89104394	+	hsa_circ_0121140	circBase	NR_015424	ANKRD36BP2	exonic	372
chr7:151983385-152012423-	5.52526	5.94713	4.72017	0.0298109	0.432824	up	0	28	0	1	0	0	0	0	0	0	1.67959	8.44679	1.67959	4.06556	1.67959	1.67959	1.67959	1.67959	1.67959	1.67959	chr7	151983384	152012423	-		novel	NM_170606	KMT2C	sense overlapping	29039
chr13:53250365-53254290+	5.52493	5.9443	4.70565	0.0300636	0.432824	up	15	2	6	1	0	0	0	0	0	0	7.66998	4.80209	6.97588	4.06556	1.67959	1.67959	1.67959	1.67959	1.67959	1.67959	chr13	53250364	53254290	+		novel	NM_006704	SUGT1	exonic	273
chr1:117939574-117963271+	5.52462	5.94545	4.71154	0.0299608	0.432824	up	1	6	1	0	18	0	0	0	0	0	4.05022	6.27216	4.56371	1.67959	7.99709	1.67959	1.67959	1.67959	1.67959	1.67959	chr1	117939573	117963271	+	hsa_circ_0110598	circBase	NM_006699	MAN1A2	sense overlapping	23698
chr3:41996114-41996299-	5.51733	5.94118	4.68954	0.0303468	0.432824	up	4	0	1	21	0	0	0	0	0	0	5.82419	1.67959	4.56371	8.16769	1.67959	1.67959	1.67959	1.67959	1.67959	1.67959	chr3	41996113	41996299	-		novel	NM_017886	ULK4	exonic	186
chrX:109263580-109310624+	5.50831	5.93395	4.65237	0.0310107	0.432824	up	13	0	7	3	0	0	0	0	0	0	7.46702	1.67959	7.19301	5.45368	1.67959	1.67959	1.67959	1.67959	1.67959	1.67959	chrX	109263579	109310624	+		novel	ENST00000288381	TMEM164	intronic	47045
chr15:81552113-81558142+	5.50763	5.93355	4.65029	0.0310484	0.432824	up	14	0	7	2	0	0	0	0	0	0	7.57207	1.67959	7.19301	4.9205	1.67959	1.67959	1.67959	1.67959	1.67959	1.67959	chr15	81552112	81558142	+		novel	NM_172217	IL16	exonic	252
chr12:27455074-27465605+	5.50736	5.93274	4.64615	0.0311233	0.432824	up	13	0	9	0	0	0	0	0	0	0	7.46702	1.67959	7.54855	1.67959	1.67959	1.67959	1.67959	1.67959	1.67959	1.67959	chr12	27455073	27465605	+		novel	NM_015000	STK38L	sense overlapping	10532
chr1:164761731-164769126+	5.50736	5.93274	4.64615	0.0311233	0.432824	up	13	0	9	0	0	0	0	0	0	0	7.46702	1.67959	7.54855	1.67959	1.67959	1.67959	1.67959	1.67959	1.67959	1.67959	chr1	164761730	164769126	+	hsa_circ_0111028	circBase	NM_002585	PBX1	exonic	436
chr12:94562929-94580249+	5.50329	5.93269	4.64575	0.0311305	0.432824	up	7	14	3	2	0	0	0	0	0	0	6.59615	7.45997	6.01213	4.9205	1.67959	1.67959	1.67959	1.67959	1.67959	1.67959	chr12	94562928	94580249	+	hsa_circ_0099504	circBase	NM_005761	PLXNC1	exonic	377
chrY:21901414-21903743-	5.5011	5.9297	4.63044	0.0314095	0.432824	up	10	2	7	4	0	0	0	0	0	0	7.09632	4.80209	7.19301	5.84211	1.67959	1.67959	1.67959	1.67959	1.67959	1.67959	chrY	21901413	21903743	-	hsa_circ_0140781	circBase	NM_004653	KDM5D	exonic	429
chr18:67613970-67614768-	5.50084	5.93159	4.64001	0.0312348	0.432824	up	0	6	0	1	19	0	0	0	0	0	1.67959	6.27216	1.67959	4.06556	8.07414	1.67959	1.67959	1.67959	1.67959	1.67959	chr18	67613969	67614768	-		novel	ENST00000579496	CD226	exonic	508
chr16:89799890-89804313+	5.49209	7.15805	8.27474	0.00402004	0.432824	up	37	6	25	6	0	0	0	2	0	0	8.95899	6.27216	9.00659	6.39996	1.67959	1.67959	1.67959	4.15401	1.67959	1.67959	chr16	89799889	89804313	+	hsa_circ_0040987	circBase	NM_152287	ZNF276	exonic	294
chr8:124089351-124132428+	5.48783	5.92335	4.59758	0.0320171	0.432824	up	7	0	2	16	0	0	0	0	0	0	6.59615	1.67959	5.46253	7.78038	1.67959	1.67959	1.67959	1.67959	1.67959	1.67959	chr8	124089350	124132428	+	hsa_circ_0085441	circBase	NM_145647	TBC1D31	exonic	1493
chr1:21212694-21231464-	5.48601	5.92271	4.5942	0.0320804	0.432824	up	7	12	2	5	0	0	0	0	0	0	6.59615	7.24195	5.46253	6.14783	1.67959	1.67959	1.67959	1.67959	1.67959	1.67959	chr1	21212693	21231464	-		novel	NM_003760	EIF4G3	exonic	761
chr2:88032486-88032641-	5.48574	5.92234	4.59233	0.0321153	0.432824	up	0	0	0	0	25	0	0	0	0	0	1.67959	1.67959	1.67959	1.67959	8.46595	1.67959	1.67959	1.67959	1.67959	1.67959	chr2	88032485	88032641	-		novel	uc002srs.4	RMND5A	antisense	156
chr12:98931253-98941449+	5.48574	5.92234	4.59233	0.0321153	0.432824	up	0	0	0	0	25	0	0	0	0	0	1.67959	1.67959	1.67959	1.67959	8.46595	1.67959	1.67959	1.67959	1.67959	1.67959	chr12	98931252	98941449	+		novel	NM_001032283	TMPO	sense overlapping	10197
chr3:127079319-127079469+	5.48574	5.92234	4.59233	0.0321153	0.432824	up	0	0	0	0	25	0	0	0	0	0	1.67959	1.67959	1.67959	1.67959	8.46595	1.67959	1.67959	1.67959	1.67959	1.67959	chr3	127079318	127079469	+		novel	NR_110147	LOC101927123	antisense	151
chr4:39322003-39329376-	5.48574	5.92234	4.59233	0.0321153	0.432824	up	0	0	0	0	25	0	0	0	0	0	1.67959	1.67959	1.67959	1.67959	8.46595	1.67959	1.67959	1.67959	1.67959	1.67959	chr4	39322002	39329376	-		novel	NM_002913	RFC1	exonic	764
chr17:53062975-53068318+	5.48574	5.92234	4.59233	0.0321153	0.432824	up	0	0	0	0	25	0	0	0	0	0	1.67959	1.67959	1.67959	1.67959	8.46595	1.67959	1.67959	1.67959	1.67959	1.67959	chr17	53062974	53068318	+		PMID:25242744	NM_178509	STXBP4	exonic	336
chr11:128933834-128936670-	5.48574	5.92234	4.59233	0.0321153	0.432824	up	0	0	0	0	25	0	0	0	0	0	1.67959	1.67959	1.67959	1.67959	8.46595	1.67959	1.67959	1.67959	1.67959	1.67959	chr11	128933833	128936670	-		novel	NM_001142685	ARHGAP32	sense overlapping	2837
chr4:83778105-83796975-	5.48574	5.92234	4.59233	0.0321153	0.432824	up	0	0	0	0	25	0	0	0	0	0	1.67959	1.67959	1.67959	1.67959	8.46595	1.67959	1.67959	1.67959	1.67959	1.67959	chr4	83778104	83796975	-		novel	NM_014933	SEC31A	exonic	1479
chr2:32818982-32828150+	5.48574	5.92234	4.59233	0.0321153	0.432824	up	0	0	0	0	25	0	0	0	0	0	1.67959	1.67959	1.67959	1.67959	8.46595	1.67959	1.67959	1.67959	1.67959	1.67959	chr2	32818981	32828150	+		novel	NM_016252	BIRC6	exonic	715
chr2:74159725-74160637+	5.48574	5.92234	4.59233	0.0321153	0.432824	up	0	0	0	0	25	0	0	0	0	0	1.67959	1.67959	1.67959	1.67959	8.46595	1.67959	1.67959	1.67959	1.67959	1.67959	chr2	74159724	74160637	+		novel	ENST00000418996	DGUOK	intronic	913
chr12:133522207-133524856-	5.48574	5.92234	4.59233	0.0321153	0.432824	up	0	0	0	0	25	0	0	0	0	0	1.67959	1.67959	1.67959	1.67959	8.46595	1.67959	1.67959	1.67959	1.67959	1.67959	chr12	133522206	133524856	-		novel	ENST00000360187	ZNF605	exonic	300
chr6:157431606-157454341+	5.48382	5.92089	4.58486	0.0322556	0.432824	up	4	7	3	11	0	0	0	0	0	0	5.82419	6.48599	6.01213	7.24934	1.67959	1.67959	1.67959	1.67959	1.67959	1.67959	chr6	157431605	157454341	+	hsa_circ_0006305	circBase	NM_017519	ARID1B	exonic	270
chr15:55640530-55640923-	5.482	5.92024	4.58148	0.0323194	0.432824	up	4	19	3	0	0	0	0	0	0	0	5.82419	7.89362	6.01213	1.67959	1.67959	1.67959	1.67959	1.67959	1.67959	1.67959	chr15	55640529	55640923	-	hsa_circ_0103916	circBase	ENST00000564663	CCPG1	intronic	394
chr7:90546916-90585132+	5.48141	5.9176	4.56809	0.0325728	0.432824	up	12	0	8	2	0	0	0	0	0	0	7.35372	1.67959	7.3817	4.9205	1.67959	1.67959	1.67959	1.67959	1.67959	1.67959	chr7	90546915	90585132	+	hsa_circ_0080985	circBase	NM_001287135	CDK14	exonic	245
chr18:67420807-67421658+	5.48113	5.91676	4.56383	0.032654	0.432824	up	11	0	10	0	0	0	0	0	0	0	7.23075	1.67959	7.69808	1.67959	1.67959	1.67959	1.67959	1.67959	1.67959	1.67959	chr18	67420806	67421658	+		novel	ENST00000577609	DOK6	intronic	852
chrX:154018229-154020560-	5.48113	5.91676	4.56383	0.032654	0.432824	up	11	0	10	0	0	0	0	0	0	0	7.23075	1.67959	7.69808	1.67959	1.67959	1.67959	1.67959	1.67959	1.67959	1.67959	chrX	154018228	154020560	-	hsa_circ_0001952	circBase	NM_002436	MPP1	exonic	378
chr5:73136305-73136585+	5.48065	5.92065	4.58348	0.0322817	0.432824	up	0	26	0	2	0	0	0	0	0	0	1.67959	8.34089	1.67959	4.9205	1.67959	1.67959	1.67959	1.67959	1.67959	1.67959	chr5	73136304	73136585	+	hsa_circ_0005777	circBase	NM_001080479	ARHGEF28	exonic	281
chr17:38209551-38209910-	5.48001	5.91678	4.56388	0.032653	0.432824	up	14	0	8	0	0	0	0	0	0	0	7.57207	1.67959	7.3817	1.67959	1.67959	1.67959	1.67959	1.67959	1.67959	1.67959	chr17	38209550	38209910	-	hsa_circ_0106807	circBase	NM_001079518	MED24	exonic	272
chr5:129997577-129997735+	5.48001	5.91678	4.56388	0.032653	0.432824	up	14	0	8	0	0	0	0	0	0	0	7.57207	1.67959	7.3817	1.67959	1.67959	1.67959	1.67959	1.67959	1.67959	1.67959	chr5	129997576	129997735	+		novel	T288690	G067484	antisense	159
chr17:67251684-67252424-	5.47627	5.91527	4.55601	0.0328034	0.432824	up	14	1	6	2	0	0	0	0	0	0	7.57207	3.95891	6.97588	4.9205	1.67959	1.67959	1.67959	1.67959	1.67959	1.67959	chr17	67251683	67252424	-	hsa_circ_0045518	circBase	NM_018672	ABCA5	exonic	337
chrX:109263580-109268798+	5.47599	5.91442	4.55173	0.0328855	0.432824	up	13	1	8	0	0	0	0	0	0	0	7.46702	3.95891	7.3817	1.67959	1.67959	1.67959	1.67959	1.67959	1.67959	1.67959	chrX	109263579	109268798	+		novel	NM_017698	TMEM164	intronic	5219
chr15:28857205-28863801+	5.47119	5.91517	4.55514	0.03282	0.432824	up	0	28	0	0	0	0	0	0	0	0	1.67959	8.44679	1.67959	1.67959	1.67959	1.67959	1.67959	1.67959	1.67959	1.67959	chr15	28857204	28863801	+	hsa_circ_0007500	circBase	ENST00000529624	HERC2P9	exonic	247
chr13:41650180-41657126+	5.47119	5.91517	4.55514	0.03282	0.432824	up	0	28	0	0	0	0	0	0	0	0	1.67959	8.44679	1.67959	1.67959	1.67959	1.67959	1.67959	1.67959	1.67959	1.67959	chr13	41650179	41657126	+		novel	NM_007187	WBP4	sense overlapping	6947
chr2:48061718-48063140-	5.47119	5.91517	4.55514	0.03282	0.432824	up	0	28	0	0	0	0	0	0	0	0	1.67959	8.44679	1.67959	1.67959	1.67959	1.67959	1.67959	1.67959	1.67959	1.67959	chr2	48061717	48063140	-	hsa_circ_0054499	circBase	NM_025133	FBXO11	exonic	347
chr1:89322889-89325969-	5.47119	5.91517	4.55514	0.03282	0.432824	up	0	28	0	0	0	0	0	0	0	0	1.67959	8.44679	1.67959	1.67959	1.67959	1.67959	1.67959	1.67959	1.67959	1.67959	chr1	89322888	89325969	-	hsa_circ_0114398	circBase	NM_001514	GTF2B	exonic	559
chr13:115002120-115002371+	5.47119	5.91517	4.55514	0.03282	0.432824	up	0	28	0	0	0	0	0	0	0	0	1.67959	8.44679	1.67959	1.67959	1.67959	1.67959	1.67959	1.67959	1.67959	1.67959	chr13	115002119	115002371	+	hsa_circ_0031074	circBase	NM_003903	CDC16	exonic	153
chr11:118425174-118430579-	5.4688	5.91324	4.54524	0.0330104	0.432824	up	4	22	1	0	0	0	0	0	0	0	5.82419	8.10247	4.56371	1.67959	1.67959	1.67959	1.67959	1.67959	1.67959	1.67959	chr11	118425173	118430579	-	hsa_circ_0008157	circBase	NM_020153	IFT46	exonic	671
chr6:87925621-87955362+	5.46557	5.91062	4.53183	0.0332701	0.432824	up	2	0	0	8	15	0	0	0	0	0	4.90353	1.67959	1.67959	6.80125	7.73767	1.67959	1.67959	1.67959	1.67959	1.67959	chr6	87925620	87955362	+	hsa_circ_0006768	circBase	NM_015021	ZNF292	exonic	852
chr3:136162129-136170989-	5.46272	5.90737	4.51526	0.0335937	0.432824	up	13	4	6	0	0	0	0	0	0	0	7.46702	5.71679	6.97588	1.67959	1.67959	1.67959	1.67959	1.67959	1.67959	1.67959	chr3	136162128	136170989	-		novel	NM_005862	STAG1	exonic	233
chr11:33358621-33363232+	5.46054	5.90692	4.51282	0.0336417	0.432824	up	6	0	3	15	0	0	0	0	0	0	6.3817	1.67959	6.01213	7.68867	1.67959	1.67959	1.67959	1.67959	1.67959	1.67959	chr11	33358620	33363232	+	hsa_circ_0021603	circBase	NM_005734	HIPK3	exonic	676
chr14:69387723-69392389-	5.45826	5.90659	4.51098	0.0336779	0.432824	up	6	18	2	0	0	0	0	0	0	0	6.3817	7.8167	5.46253	1.67959	1.67959	1.67959	1.67959	1.67959	1.67959	1.67959	chr14	69387722	69392389	-	hsa_circ_0007644	circBase	NM_001102	ACTN1	exonic	235
chr8:53586405-53596573-	5.45329	5.90062	4.4806	0.0342817	0.432824	up	12	0	9	0	0	0	0	0	0	0	7.35372	1.67959	7.54855	1.67959	1.67959	1.67959	1.67959	1.67959	1.67959	1.67959	chr8	53586404	53596573	-		novel	NM_014781	RB1CC1	exonic	931
chr10:113138511-113179489+	5.45329	5.90062	4.4806	0.0342817	0.432824	up	12	0	9	0	0	0	0	0	0	0	7.35372	1.67959	7.54855	1.67959	1.67959	1.67959	1.67959	1.67959	1.67959	1.67959	chr10	113138510	113179489	+		novel	T048632	G011350	sense overlapping	40979
chr6:154567725-154568622-	5.45329	5.90062	4.4806	0.0342817	0.432824	up	12	0	9	0	0	0	0	0	0	0	7.35372	1.67959	7.54855	1.67959	1.67959	1.67959	1.67959	1.67959	1.67959	1.67959	chr6	154567724	154568622	-		novel	NM_001130699	IPCEF1	exonic	210
chr18:51686135-51731527-	5.45261	5.90163	4.48563	0.034181	0.432824	up	9	1	5	8	0	0	0	0	0	0	6.94807	3.95891	6.72017	6.80125	1.67959	1.67959	1.67959	1.67959	1.67959	1.67959	chr18	51686134	51731527	-	hsa_circ_0005584	circBase	NM_003927	MBD2	exonic	706
chr5:63621013-63626233+	5.45215	5.90066	4.48073	0.0342791	0.432824	up	15	0	7	0	0	0	0	0	0	0	7.66998	1.67959	7.19301	1.67959	1.67959	1.67959	1.67959	1.67959	1.67959	1.67959	chr5	63621012	63626233	+	hsa_circ_0129323	circBase	NM_001113561	RNF180	exonic	352
chr1:78411191-78422385-	5.45215	5.90066	4.48073	0.0342791	0.432824	up	15	0	7	0	0	0	0	0	0	0	7.66998	1.67959	7.19301	1.67959	1.67959	1.67959	1.67959	1.67959	1.67959	1.67959	chr1	78411190	78422385	-		novel	NM_003902	FUBP1	sense overlapping	11195
chr6:33638289-33651058+	5.45215	5.90066	4.48073	0.0342791	0.432824	up	15	0	7	0	0	0	0	0	0	0	7.66998	1.67959	7.19301	1.67959	1.67959	1.67959	1.67959	1.67959	1.67959	1.67959	chr6	33638288	33651058	+		novel	NM_002224	ITPR3	sense overlapping	12770
chr8:141856359-141900868-	5.45176	5.90227	4.48875	0.0341186	0.432824	up	9	13	3	0	0	0	0	0	0	0	6.94807	7.35508	6.01213	1.67959	1.67959	1.67959	1.67959	1.67959	1.67959	1.67959	chr8	141856358	141900868	-	hsa_circ_0003221	circBase	NM_005607	PTK2	exonic	625
chr5:1611784-1612107-	5.45128	5.90178	4.48624	0.0341688	0.432824	up	1	0	1	0	22	0	0	0	0	0	4.05022	1.67959	4.56371	1.67959	8.2833	1.67959	1.67959	1.67959	1.67959	1.67959	chr5	1611783	1612107	-		novel	ENST00000502273	RP11-43F13.1	intronic	324
chr12:19496257-19506936+	5.44507	5.89585	4.46074	0.0346824	0.432824	up	10	2	9	0	0	0	0	0	0	0	7.09632	4.80209	7.54855	1.67959	1.67959	1.67959	1.67959	1.67959	1.67959	1.67959	chr12	19496256	19506936	+	hsa_circ_0098097	circBase	NM_019012	PLEKHA5	exonic	399
chr11:118630631-118634015-	5.44431	5.89923	4.47287	0.0344372	0.432824	up	0	22	0	5	0	0	0	0	0	0	1.67959	8.10247	1.67959	6.14783	1.67959	1.67959	1.67959	1.67959	1.67959	1.67959	chr11	118630630	118634015	-	hsa_circ_0024495	circBase	NM_004397	DDX6	exonic	218
chr3:170841385-170858298-	5.43979	5.89351	4.45235	0.0348533	0.432824	up	12	3	7	0	0	0	0	0	0	0	7.35372	5.33075	7.19301	1.67959	1.67959	1.67959	1.67959	1.67959	1.67959	1.67959	chr3	170841384	170858298	-		novel	NM_015028	TNIK	exonic	899
chr16:68191772-68200918+	5.43918	5.89571	4.45977	0.0347022	0.432824	up	1	17	1	7	0	0	0	0	0	0	4.05022	7.73544	4.56371	6.61451	1.67959	1.67959	1.67959	1.67959	1.67959	1.67959	chr16	68191771	68200918	+	hsa_circ_0105779	circBase	NM_004555	NFATC3	exonic	373
chr3:136183723-136221621-	5.42843	5.88897	4.4359	0.0351907	0.432824	up	3	13	2	7	0	0	0	0	0	0	5.43609	7.35508	5.46253	6.61451	1.67959	1.67959	1.67959	1.67959	1.67959	1.67959	chr3	136183722	136221621	-	hsa_circ_0067480	circBase	NM_005862	STAG1	exonic	637
chr2:136389288-136403097+	5.4282	5.88861	4.43467	0.035216	0.432824	up	0	0	0	0	24	0	0	0	0	0	1.67959	1.67959	1.67959	1.67959	8.4076	1.67959	1.67959	1.67959	1.67959	1.67959	chr2	136389287	136403097	+		novel	NM_015361	R3HDM1	exonic	1126
chr4:129873924-129965206-	5.4282	5.88861	4.43467	0.035216	0.432824	up	0	0	0	0	24	0	0	0	0	0	1.67959	1.67959	1.67959	1.67959	8.4076	1.67959	1.67959	1.67959	1.67959	1.67959	chr4	129873923	129965206	-		novel	NM_144643	SCLT1	exonic	1116
chr5:131923254-131927726+	5.4282	5.88861	4.43467	0.035216	0.432824	up	0	0	0	0	24	0	0	0	0	0	1.67959	1.67959	1.67959	1.67959	8.4076	1.67959	1.67959	1.67959	1.67959	1.67959	chr5	131923253	131927726	+		novel	NM_005732	RAD50	exonic	1037
chr12:121747773-121756227+	5.4282	5.88861	4.43467	0.035216	0.432824	up	0	0	0	0	24	0	0	0	0	0	1.67959	1.67959	1.67959	1.67959	8.4076	1.67959	1.67959	1.67959	1.67959	1.67959	chr12	121747772	121756227	+		novel	NM_016237	ANAPC5	antisense	8455
chr2:219341563-219350983-	5.4282	5.88861	4.43467	0.035216	0.432824	up	0	0	0	0	24	0	0	0	0	0	1.67959	1.67959	1.67959	1.67959	8.4076	1.67959	1.67959	1.67959	1.67959	1.67959	chr2	219341562	219350983	-		novel	uc010zkf.1	USP37	sense overlapping	9421
chr18:51690893-51731527-	5.4282	5.88861	4.43467	0.035216	0.432824	up	0	0	0	0	24	0	0	0	0	0	1.67959	1.67959	1.67959	1.67959	8.4076	1.67959	1.67959	1.67959	1.67959	1.67959	chr18	51690892	51731527	-	hsa_circ_0108619	circBase	NM_003927	MBD2	exonic	567
chr8:104412693-104420012-	5.4282	5.88861	4.43467	0.035216	0.432824	up	0	0	0	0	24	0	0	0	0	0	1.67959	1.67959	1.67959	1.67959	8.4076	1.67959	1.67959	1.67959	1.67959	1.67959	chr8	104412692	104420012	-	hsa_circ_0135396	circBase	NM_030780	SLC25A32	sense overlapping	7320
chr2:230666968-230672580-	5.42565	5.88608	4.42582	0.0353992	0.432824	up	6	7	5	5	0	0	0	0	0	0	6.3817	6.48599	6.72017	6.14783	1.67959	1.67959	1.67959	1.67959	1.67959	1.67959	chr2	230666967	230672580	-	hsa_circ_0058565	circBase	NM_004238	TRIP12	exonic	786
chr20:39690034-39709880+	5.42558	5.88474	4.42125	0.035494	0.432824	up	12	0	8	1	0	0	0	0	0	0	7.35372	1.67959	7.3817	4.06556	1.67959	1.67959	1.67959	1.67959	1.67959	1.67959	chr20	39690033	39709880	+	hsa_circ_0115210	circBase	NM_003286	TOP1	exonic	449
chr14:95590533-95608085-	5.42558	5.88474	4.42125	0.035494	0.432824	up	12	0	8	1	0	0	0	0	0	0	7.35372	1.67959	7.3817	4.06556	1.67959	1.67959	1.67959	1.67959	1.67959	1.67959	chr14	95590532	95608085	-	hsa_circ_0103005	circBase	NM_030621	DICER1	exonic	1588
chr4:120419718-120432289-	5.42535	5.88532	4.42322	0.0354531	0.432824	up	7	1	6	8	0	0	0	0	0	0	6.59615	3.95891	6.97588	6.80125	1.67959	1.67959	1.67959	1.67959	1.67959	1.67959	chr4	120419717	120432289	-		novel	NM_001083	PDE5A	sense overlapping	12572
chr11:68326034-68331900+	5.42488	5.88808	4.43256	0.0352596	0.432824	up	0	26	0	1	0	0	0	0	0	0	1.67959	8.34089	1.67959	4.06556	1.67959	1.67959	1.67959	1.67959	1.67959	1.67959	chr11	68326033	68331900	+		novel	NM_018312	PPP6R3	exonic	244
chr1:167353094-167358998+	5.42488	5.88808	4.43256	0.0352596	0.432824	up	0	26	0	1	0	0	0	0	0	0	1.67959	8.34089	1.67959	4.06556	1.67959	1.67959	1.67959	1.67959	1.67959	1.67959	chr1	167353093	167358998	+	hsa_circ_0015099	circBase	NM_002697	POU2F1	exonic	269
chr5:35212047-35212198-	5.42486	5.88432	4.41977	0.0355249	0.432824	up	13	0	8	0	0	0	0	0	0	0	7.46702	1.67959	7.3817	1.67959	1.67959	1.67959	1.67959	1.67959	1.67959	1.67959	chr5	35212046	35212198	-		novel	ENST00000342362	PRLR	intronic	152
chr15:40488746-40494895+	5.42486	5.88432	4.41977	0.0355249	0.432824	up	13	0	8	0	0	0	0	0	0	0	7.46702	1.67959	7.3817	1.67959	1.67959	1.67959	1.67959	1.67959	1.67959	1.67959	chr15	40488745	40494895	+	hsa_circ_0034568	circBase	NM_001211	BUB1B	exonic	676
chr16:12426550-12426707+	5.42486	5.88432	4.41977	0.0355249	0.432824	up	13	0	8	0	0	0	0	0	0	0	7.46702	1.67959	7.3817	1.67959	1.67959	1.67959	1.67959	1.67959	1.67959	1.67959	chr16	12426549	12426707	+		novel	ENST00000306030	SNX29	intronic	158
chr3:185879392-185906168-	5.42486	5.88432	4.41977	0.0355249	0.432824	up	13	0	8	0	0	0	0	0	0	0	7.46702	1.67959	7.3817	1.67959	1.67959	1.67959	1.67959	1.67959	1.67959	1.67959	chr3	185879391	185906168	-		novel	NM_001346	DGKG	exonic	360
chr13:96485181-96511929-	5.42486	5.88432	4.41977	0.0355249	0.432824	up	13	0	8	0	0	0	0	0	0	0	7.46702	1.67959	7.3817	1.67959	1.67959	1.67959	1.67959	1.67959	1.67959	1.67959	chr13	96485180	96511929	-	hsa_circ_0006178	circBase	NM_020121	UGGT2	exonic	788
chr3:137928659-137964025+	5.42486	5.88432	4.41977	0.0355249	0.432824	up	13	0	8	0	0	0	0	0	0	0	7.46702	1.67959	7.3817	1.67959	1.67959	1.67959	1.67959	1.67959	1.67959	1.67959	chr3	137928658	137964025	+	hsa_circ_0122090	circBase	NM_015396	ARMC8	exonic	1089
chr22:36690978-36698722-	5.42486	5.88432	4.41977	0.0355249	0.432824	up	13	0	8	0	0	0	0	0	0	0	7.46702	1.67959	7.3817	1.67959	1.67959	1.67959	1.67959	1.67959	1.67959	1.67959	chr22	36690977	36698722	-		novel	NM_002473	MYH9	exonic	1240
chr21:16351522-16363627-	5.42416	5.88767	4.43109	0.03529	0.432824	up	1	26	0	0	0	0	0	0	0	0	4.05022	8.34089	1.67959	1.67959	1.67959	1.67959	1.67959	1.67959	1.67959	1.67959	chr21	16351521	16363627	-		novel	ENST00000400199	NRIP1	intronic	12106
chr3:174236867-174268427+	5.42371	5.88439	4.41989	0.0355222	0.432824	up	16	0	6	0	0	0	0	0	0	0	7.76167	1.67959	6.97588	1.67959	1.67959	1.67959	1.67959	1.67959	1.67959	1.67959	chr3	174236866	174268427	+	hsa_circ_0122757	circBase	uc003fir.3	NAALADL2	intronic	31561
chr7:148718059-148722515-	5.42371	5.88439	4.41989	0.0355222	0.432824	up	16	0	6	0	0	0	0	0	0	0	7.76167	1.67959	6.97588	1.67959	1.67959	1.67959	1.67959	1.67959	1.67959	1.67959	chr7	148718058	148722515	-		novel	NM_004911	PDIA4	sense overlapping	4457
chr1:64017396-64018992+	5.42371	5.88439	4.41989	0.0355222	0.432824	up	16	0	6	0	0	0	0	0	0	0	7.76167	1.67959	6.97588	1.67959	1.67959	1.67959	1.67959	1.67959	1.67959	1.67959	chr1	64017395	64018992	+		novel	NM_032437	EFCAB7	sense overlapping	1597
chr14:70659086-70659238+	5.41998	5.88528	4.4226	0.035466	0.432824	up	0	27	0	0	0	0	0	0	0	0	1.67959	8.39481	1.67959	1.67959	1.67959	1.67959	1.67959	1.67959	1.67959	1.67959	chr14	70659085	70659238	+		novel	ENST00000555480	RP11-486O13.2	exonic	153
chr11:61079256-61079556-	5.41998	5.88528	4.4226	0.035466	0.432824	up	0	27	0	0	0	0	0	0	0	0	1.67959	8.39481	1.67959	1.67959	1.67959	1.67959	1.67959	1.67959	1.67959	1.67959	chr11	61079255	61079556	-	hsa_circ_0022282	circBase	NM_001923	DDB1	exonic	208
chr15:65266940-65275931-	5.41749	5.88328	4.41557	0.0356124	0.432824	up	4	21	1	0	0	0	0	0	0	0	5.82419	8.03616	4.56371	1.67959	1.67959	1.67959	1.67959	1.67959	1.67959	1.67959	chr15	65266939	65275931	-	hsa_circ_0003526	circBase	NM_016630	SPG21	exonic	476
chr3:69267473-69273841-	5.41591	5.88193	4.41084	0.0357112	0.432824	up	2	10	1	12	0	0	0	0	0	0	4.90353	6.98501	4.56371	7.37233	1.67959	1.67959	1.67959	1.67959	1.67959	1.67959	chr3	69267472	69273841	-	hsa_circ_0124538	circBase	uc011bga.1	FRMD4B	exonic	208
chr15:32820733-32825569-	5.40545	6.60949	5.98728	0.0144094	0.432824	up	2	19	1	8	23	0	0	1	0	0	4.90353	7.89362	4.56371	6.80125	8.34679	1.67959	1.67959	3.39273	1.67959	1.67959	chr15	32820732	32825569	-	hsa_circ_0003609	circBase	ENST00000454486	RP11-632K20.7	exonic	500
chr4:90848946-90857949+	5.40482	5.87571	4.38866	0.0361787	0.432824	up	0	12	0	0	13	0	0	0	0	0	1.67959	7.24195	1.67959	1.67959	7.53454	1.67959	1.67959	1.67959	1.67959	1.67959	chr4	90848945	90857949	+		novel	NM_007351	MMRN1	exonic	2163
chr4:4317363-4317697+	5.40234	6.60661	5.96667	0.0145788	0.432824	up	32	0	14	0	0	0	0	1	0	0	8.75099	1.67959	8.17713	1.67959	1.67959	1.67959	1.67959	3.39273	1.67959	1.67959	chr4	4317362	4317697	+	hsa_circ_0006333	circBase	NM_145291	ZBTB49	exonic	245
chr20:42331130-42333998+	5.40054	5.87245	4.37714	0.0364241	0.432824	up	8	12	3	1	0	0	0	0	0	0	6.78281	7.24195	6.01213	4.06556	1.67959	1.67959	1.67959	1.67959	1.67959	1.67959	chr20	42331129	42333998	+	hsa_circ_0006332	circBase	NM_002466	MYBL2	exonic	554
chr12:26748398-26755639-	5.3982	5.87066	4.37083	0.0365592	0.432824	up	7	1	3	12	0	0	0	0	0	0	6.59615	3.95891	6.01213	7.37233	1.67959	1.67959	1.67959	1.67959	1.67959	1.67959	chr12	26748397	26755639	-	hsa_circ_0098222	circBase	NM_002223	ITPR2	exonic	918
chr2:238617187-238629465+	5.39701	5.86776	4.36085	0.0367741	0.432824	up	11	0	9	0	0	0	0	0	0	0	7.23075	1.67959	7.54855	1.67959	1.67959	1.67959	1.67959	1.67959	1.67959	1.67959	chr2	238617186	238629465	+	hsa_circ_0058844	circBase	NM_004735	LRRFIP1	exonic	183
chr5:7720186-7720337-	5.39701	5.86776	4.36085	0.0367741	0.432824	up	11	0	9	0	0	0	0	0	0	0	7.23075	1.67959	7.54855	1.67959	1.67959	1.67959	1.67959	1.67959	1.67959	1.67959	chr5	7720185	7720337	-		novel	ENST00000514105	RP11-711G10.1	intronic	152
chr20:47682729-47683047+	5.39587	5.86785	4.36105	0.0367697	0.432824	up	14	0	7	0	0	0	0	0	0	0	7.57207	1.67959	7.19301	1.67959	1.67959	1.67959	1.67959	1.67959	1.67959	1.67959	chr20	47682728	47683047	+	hsa_circ_0060732	circBase	NM_001316	CSE1L	exonic	248
chr15:51031877-51041067-	5.39587	5.86785	4.36105	0.0367697	0.432824	up	14	0	7	0	0	0	0	0	0	0	7.57207	1.67959	7.19301	1.67959	1.67959	1.67959	1.67959	1.67959	1.67959	1.67959	chr15	51031876	51041067	-	hsa_circ_0103799	circBase	NM_032802	SPPL2A	exonic	556
chr16:21350242-21363459+	5.3851	5.86097	4.33655	0.0373024	0.432824	up	0	4	9	7	0	0	0	0	0	0	1.67959	5.71679	7.54855	6.61451	1.67959	1.67959	1.67959	1.67959	1.67959	1.67959	chr16	21350241	21363459	+	hsa_circ_0002317	circBase	NR_045011	SNX29P1	sense overlapping	13218
chr11:73390699-73427390-	5.38444	6.81954	6.6374	0.00998596	0.432824	up	0	1	24	5	21	0	0	0	0	1	1.67959	3.95891	8.94807	6.14783	8.21689	1.67959	1.67959	1.67959	1.67959	4.03351	chr11	73390698	73427390	-		novel	NM_002869	RAB6A	sense overlapping	36692
chrX:122747250-122748040-	5.38273	5.86233	4.34099	0.0372053	0.432824	up	5	16	3	0	0	0	0	0	0	0	6.12971	7.64933	6.01213	1.67959	1.67959	1.67959	1.67959	1.67959	1.67959	1.67959	chrX	122747249	122748040	-		novel	NM_001081550	THOC2	exonic	366
chr18:21087949-21099138+	5.38273	5.86233	4.34099	0.0372053	0.432824	up	5	16	3	0	0	0	0	0	0	0	6.12971	7.64933	6.01213	1.67959	1.67959	1.67959	1.67959	1.67959	1.67959	1.67959	chr18	21087948	21099138	+	hsa_circ_0002757	circBase	NM_013326	C18orf8	exonic	585
chr17:29070319-29096983+	5.37899	5.86109	4.33642	0.0373053	0.432824	up	0	12	0	13	0	0	0	0	0	0	1.67959	7.24195	1.67959	7.48566	1.67959	1.67959	1.67959	1.67959	1.67959	1.67959	chr17	29070318	29096983	+		novel	ENST00000578195	SUZ12P	exonic	529
chr1:145592633-145595220-	5.37207	5.85064	4.30005	0.0381113	0.432824	up	0	0	16	0	0	0	0	0	0	0	1.67959	1.67959	8.36778	1.67959	1.67959	1.67959	1.67959	1.67959	1.67959	1.67959	chr1	145592632	145595220	-	hsa_circ_0007755	circBase	NM_006468	POLR3C	sense overlapping	2588
chr2:68740212-68772444+	5.36932	5.85292	4.30759	0.0379427	0.432824	up	11	0	6	4	0	0	0	0	0	0	7.23075	1.67959	6.97588	5.84211	1.67959	1.67959	1.67959	1.67959	1.67959	1.67959	chr2	68740211	68772444	+	hsa_circ_0120805	circBase	NM_173545	APLF	exonic	945
chr15:63951935-63956793-	5.36896	5.85195	4.30425	0.0380172	0.432824	up	10	0	8	2	0	0	0	0	0	0	7.09632	1.67959	7.3817	4.9205	1.67959	1.67959	1.67959	1.67959	1.67959	1.67959	chr15	63951934	63956793	-	hsa_circ_0035731	circBase	NM_003922	HERC1	exonic	869
chr12:27521195-27530497+	5.36829	5.85408	4.31146	0.0378565	0.432824	up	0	0	0	0	23	0	0	0	0	0	1.67959	1.67959	1.67959	1.67959	8.34679	1.67959	1.67959	1.67959	1.67959	1.67959	chr12	27521194	27530497	+	hsa_circ_0098257	circBase	NM_020183	ARNTL2	sense overlapping	9303
chr6:30457594-30457749+	5.36829	5.85408	4.31146	0.0378565	0.432824	up	0	0	0	0	23	0	0	0	0	0	1.67959	1.67959	1.67959	1.67959	8.34679	1.67959	1.67959	1.67959	1.67959	1.67959	chr6	30457593	30457749	+		novel	NM_005516	HLA-E	sense overlapping	156
chr20:33000321-33012331+	5.36829	5.85408	4.31146	0.0378565	0.432824	up	0	0	0	0	23	0	0	0	0	0	1.67959	1.67959	1.67959	1.67959	8.34679	1.67959	1.67959	1.67959	1.67959	1.67959	chr20	33000320	33012331	+		novel	NM_031483	ITCH	exonic	309
chr3:155632208-155633981+	5.36829	5.85408	4.31146	0.0378565	0.432824	up	0	0	0	0	23	0	0	0	0	0	1.67959	1.67959	1.67959	1.67959	8.34679	1.67959	1.67959	1.67959	1.67959	1.67959	chr3	155632207	155633981	+	hsa_circ_0067785	circBase	NM_003875	GMPS	exonic	326
chr20:826385-826574+	5.36829	5.85408	4.31146	0.0378565	0.432824	up	0	0	0	0	23	0	0	0	0	0	1.67959	1.67959	1.67959	1.67959	8.34679	1.67959	1.67959	1.67959	1.67959	1.67959	chr20	826384	826574	+		novel	ENST00000505691	FAM110A	intronic	190
chr1:185171786-185191168+	5.36829	5.85408	4.31146	0.0378565	0.432824	up	0	0	0	0	23	0	0	0	0	0	1.67959	1.67959	1.67959	1.67959	8.34679	1.67959	1.67959	1.67959	1.67959	1.67959	chr1	185171785	185191168	+	hsa_circ_0111490	circBase	NM_017673	SWT1	exonic	786
chr2:32855590-32859072+	5.36829	5.85408	4.31146	0.0378565	0.432824	up	0	0	0	0	23	0	0	0	0	0	1.67959	1.67959	1.67959	1.67959	8.34679	1.67959	1.67959	1.67959	1.67959	1.67959	chr2	32855589	32859072	+		novel	NM_017735	TTC27	exonic	308
chr4:54248445-54266006+	5.36829	5.85408	4.31146	0.0378565	0.432824	up	0	0	0	0	23	0	0	0	0	0	1.67959	1.67959	1.67959	1.67959	8.34679	1.67959	1.67959	1.67959	1.67959	1.67959	chr4	54248444	54266006	+	hsa_circ_0126593	circBase	NM_030917	FIP1L1	exonic	645
chr20:25398741-25422412+	5.36821	5.85153	4.30272	0.0380514	0.432824	up	11	0	8	1	0	0	0	0	0	0	7.23075	1.67959	7.3817	4.06556	1.67959	1.67959	1.67959	1.67959	1.67959	1.67959	chr20	25398740	25422412	+	hsa_circ_0004483	circBase	NM_021067	GINS1	exonic	283
chr16:14678204-14678648-	5.36745	5.8511	4.30119	0.0380857	0.432824	up	12	0	8	0	0	0	0	0	0	0	7.35372	1.67959	7.3817	1.67959	1.67959	1.67959	1.67959	1.67959	1.67959	1.67959	chr16	14678203	14678648	-	hsa_circ_0037962	circBase	NM_002582	PARN	exonic	119
chr10:128829914-128836080+	5.36745	5.8511	4.30119	0.0380857	0.432824	up	12	0	8	0	0	0	0	0	0	0	7.35372	1.67959	7.3817	1.67959	1.67959	1.67959	1.67959	1.67959	1.67959	1.67959	chr10	128829913	128836080	+	hsa_circ_0002050	circBase	NM_001290223	DOCK1	exonic	386
chr2:105003178-105003328-	5.36745	5.8511	4.30119	0.0380857	0.432824	up	12	0	8	0	0	0	0	0	0	0	7.35372	1.67959	7.3817	1.67959	1.67959	1.67959	1.67959	1.67959	1.67959	1.67959	chr2	105003177	105003328	-		novel	NR_037885	LOC100287010	intronic	151
chr17:58756814-58786686+	5.36745	5.8511	4.30119	0.0380857	0.432824	up	12	0	8	0	0	0	0	0	0	0	7.35372	1.67959	7.3817	1.67959	1.67959	1.67959	1.67959	1.67959	1.67959	1.67959	chr17	58756813	58786686	+	hsa_circ_0007682	circBase	NM_017679	BCAS3	exonic	326
chr6:159058160-159058926-	5.36745	5.8511	4.30119	0.0380857	0.432824	up	12	0	8	0	0	0	0	0	0	0	7.35372	1.67959	7.3817	1.67959	1.67959	1.67959	1.67959	1.67959	1.67959	1.67959	chr6	159058159	159058926	-	hsa_circ_0131218	circBase	NM_006519	DYNLT1	exonic	202
chr1:76194086-76205795+	5.36693	5.85476	4.31365	0.0378078	0.432824	up	0	26	0	0	0	0	0	0	0	0	1.67959	8.34089	1.67959	1.67959	1.67959	1.67959	1.67959	1.67959	1.67959	1.67959	chr1	76194085	76205795	+	hsa_circ_0114109	circBase	NM_000016	ACADM	exonic	569
chr6:64389901-64395812+	5.36693	5.85476	4.31365	0.0378078	0.432824	up	0	26	0	0	0	0	0	0	0	0	1.67959	8.34089	1.67959	1.67959	1.67959	1.67959	1.67959	1.67959	1.67959	1.67959	chr6	64389900	64395812	+	hsa_circ_0132059	circBase	NM_015153	PHF3	exonic	1945
chrM:4015-4168+	5.36693	5.85476	4.31365	0.0378078	0.432824	up	0	26	0	0	0	0	0	0	0	0	1.67959	8.34089	1.67959	1.67959	1.67959	1.67959	1.67959	1.67959	1.67959	1.67959	chrM	4014	4168	+		novel	T370381	G087361	intronic	154
chr6:143222801-143248574-	5.36693	5.85476	4.31365	0.0378078	0.432824	up	0	26	0	0	0	0	0	0	0	0	1.67959	8.34089	1.67959	1.67959	1.67959	1.67959	1.67959	1.67959	1.67959	1.67959	chr6	143222800	143248574	-		novel	GSE61474_TCONS_00293361	GSE61474_XLOC_055671	intronic	25774
chr17:40481428-40481794-	5.36693	5.85476	4.31365	0.0378078	0.432824	up	0	26	0	0	0	0	0	0	0	0	1.67959	8.34089	1.67959	1.67959	1.67959	1.67959	1.67959	1.67959	1.67959	1.67959	chr17	40481427	40481794	-	hsa_circ_0043813	circBase	NM_003150	STAT3	exonic	172
chr4:75065511-75067087+	5.3663	5.85122	4.30147	0.0380794	0.432824	up	15	0	6	0	0	0	0	0	0	0	7.66998	1.67959	6.97588	1.67959	1.67959	1.67959	1.67959	1.67959	1.67959	1.67959	chr4	75065510	75067087	+	hsa_circ_0069986	circBase	NM_001144978	MTHFD2L	exonic	261
chr3:183558358-183562114-	5.3663	5.85122	4.30147	0.0380794	0.432824	up	15	0	6	0	0	0	0	0	0	0	7.66998	1.67959	6.97588	1.67959	1.67959	1.67959	1.67959	1.67959	1.67959	1.67959	chr3	183558357	183562114	-	hsa_circ_0068252	circBase	NM_018622	PARL	exonic	317
chr1:94924163-94946162+	5.36497	5.85046	4.29878	0.0381398	0.432824	up	10	1	6	4	0	0	0	0	0	0	7.09632	3.95891	6.97588	5.84211	1.67959	1.67959	1.67959	1.67959	1.67959	1.67959	chr1	94924162	94946162	+	hsa_circ_0013232	circBase	NM_002858	ABCD3	exonic	717
chr14:21834598-21838647-	5.35583	6.82899	6.60889	0.0101471	0.432824	up	0	10	0	0	53	0	1	0	0	0	1.67959	6.98501	1.67959	1.67959	9.54309	1.67959	4.12957	1.67959	1.67959	1.67959	chr14	21834597	21838647	-	hsa_circ_0101453	circBase	NM_007192	SUPT16H	exonic	716
chr10:32806873-32807433+	5.3556	5.84779	4.28873	0.0383657	0.432824	up	2	22	1	0	0	0	0	0	0	0	4.90353	8.10247	4.56371	1.67959	1.67959	1.67959	1.67959	1.67959	1.67959	1.67959	chr10	32806872	32807433	+		novel	NM_145023	CCDC7	exonic	121
chr4:39843568-39851272-	5.35547	5.84739	4.28735	0.0383971	0.432824	up	0	5	0	19	0	0	0	0	0	0	1.67959	6.02104	1.67959	8.02499	1.67959	1.67959	1.67959	1.67959	1.67959	1.67959	chr4	39843567	39851272	-	hsa_circ_0126287	circBase	NM_001100399	PDS5A	exonic	571
chr5:139889222-139889766+	5.34838	5.84389	4.27469	0.0386839	0.432824	up	0	18	0	7	0	0	0	0	0	0	1.67959	7.8167	1.67959	6.61451	1.67959	1.67959	1.67959	1.67959	1.67959	1.67959	chr5	139889221	139889766	+	hsa_circ_0001542	circBase	NM_017747	ANKHD1	exonic	339	Alzheimer's disease, B-cell lymphoma, Hodgkin's lymphoma, T-cell leukemia, autism spectrum disorder (ASD), breast cancer, chronic lymphocytic leukemia (CLL), chronic myeloid leukemia (CML), colorectal cancer, diffuse large B-cell lymphoma (DLBCL), epithelial ovarian cancer (EOC), follicular lymphoma (FL), gastric cancer (stomach cancer), glioma, hepatocellular carcinoma (HCC), kidney cancer, lung…
chr4:184614742-184622961+	5.34767	5.8424	4.26953	0.0388017	0.432824	up	4	0	1	18	0	0	0	0	0	0	5.82419	1.67959	4.56371	7.94797	1.67959	1.67959	1.67959	1.67959	1.67959	1.67959	chr4	184614741	184622961	+	hsa_circ_0071515	circBase	NM_021942	TRAPPC11	exonic	726
chr21:40581921-40584633-	5.33729	5.83427	4.24065	0.0394671	0.432824	up	13	0	7	0	0	0	0	0	0	0	7.46702	1.67959	7.19301	1.67959	1.67959	1.67959	1.67959	1.67959	1.67959	1.67959	chr21	40581920	40584633	-		novel	NM_018963	BRWD1	exonic	339
chr11:10824577-10827594-	5.33729	5.83427	4.24065	0.0394671	0.432824	up	13	0	7	0	0	0	0	0	0	0	7.46702	1.67959	7.19301	1.67959	1.67959	1.67959	1.67959	1.67959	1.67959	1.67959	chr11	10824576	10827594	-	hsa_circ_0021264	circBase	NM_001418	EIF4G2	exonic	889
chr6:36057458-36063643+	5.33729	5.83427	4.24065	0.0394671	0.432824	up	13	0	7	0	0	0	0	0	0	0	7.46702	1.67959	7.19301	1.67959	1.67959	1.67959	1.67959	1.67959	1.67959	1.67959	chr6	36057457	36063643	+		novel	NM_001315	MAPK14	intronic	6186
chr3:125170149-125176209-	5.33729	5.83427	4.24065	0.0394671	0.432824	up	13	0	7	0	0	0	0	0	0	0	7.46702	1.67959	7.19301	1.67959	1.67959	1.67959	1.67959	1.67959	1.67959	1.67959	chr3	125170148	125176209	-	hsa_circ_0121749	circBase	NM_003794	SNX4	exonic	361
chr12:50821545-50848200+	5.33729	5.83427	4.24065	0.0394671	0.432824	up	13	0	7	0	0	0	0	0	0	0	7.46702	1.67959	7.19301	1.67959	1.67959	1.67959	1.67959	1.67959	1.67959	1.67959	chr12	50821544	50848200	+	hsa_circ_0026229	circBase	NM_052879	LARP4	exonic	1103
chr6:91300400-91300560-	5.33729	5.83427	4.24065	0.0394671	0.432824	up	13	0	7	0	0	0	0	0	0	0	7.46702	1.67959	7.19301	1.67959	1.67959	1.67959	1.67959	1.67959	1.67959	1.67959	chr6	91300399	91300560	-		novel	T308013	G072051	antisense	161
chr2:49970483-49989922+	5.32877	5.83132	4.22971	0.0397223	0.432824	up	1	0	1	1	19	0	0	0	0	0	4.05022	1.67959	4.56371	4.06556	8.07414	1.67959	1.67959	1.67959	1.67959	1.67959	chr2	49970482	49989922	+		novel	T189268	G043514	sense overlapping	19440
chr7:140402666-140404763+	5.32724	5.83148	4.23009	0.0397134	0.432824	up	1	16	1	6	0	0	0	0	0	0	4.05022	7.64933	4.56371	6.39996	1.67959	1.67959	1.67959	1.67959	1.67959	1.67959	chr7	140402665	140404763	+	hsa_circ_0007518	circBase	NM_004546	NDUFB2	exonic	249
chr14:76330010-76368567+	5.32514	5.8293	4.22243	0.0398931	0.432824	up	3	0	1	0	18	0	0	0	0	0	5.43609	1.67959	4.56371	1.67959	7.99709	1.67959	1.67959	1.67959	1.67959	1.67959	chr14	76330009	76368567	+	hsa_circ_0007946	circBase	NM_015072	TTLL5	exonic	497
chr16:18852887-18856973-	5.31927	6.67137	6.01622	0.014175	0.432824	up	4	0	25	5	9	1	0	0	0	0	5.82419	1.67959	9.00659	6.14783	7.01507	3.74482	1.67959	1.67959	1.67959	1.67959	chr16	18852886	18856973	-	hsa_circ_0006434	circBase	NM_015092	SMG1	exonic	700
chr2:144244767-144245064+	5.31441	5.82323	4.20053	0.0404114	0.432824	up	7	0	2	13	0	0	0	0	0	0	6.59615	1.67959	5.46253	7.48566	1.67959	1.67959	1.67959	1.67959	1.67959	1.67959	chr2	144244766	144245064	+		novel	NM_018460	ARHGAP15	sense overlapping	298
chr2:58275962-58316858+	5.31201	5.8216	4.19469	0.0405509	0.432824	up	6	12	4	0	0	0	0	0	0	0	6.3817	7.24195	6.40915	1.67959	1.67959	1.67959	1.67959	1.67959	1.67959	1.67959	chr2	58275961	58316858	+	hsa_circ_0120478	circBase	NM_006296	VRK2	exonic	548
chr6:86246510-86251761-	5.31185	5.82358	4.20146	0.0403893	0.432824	up	0	25	0	0	0	0	0	0	0	0	1.67959	8.28488	1.67959	1.67959	1.67959	1.67959	1.67959	1.67959	1.67959	1.67959	chr6	86246509	86251761	-	hsa_circ_0008871	circBase	NM_020468	SNX14	exonic	192
chr7:6042084-6042267-	5.31185	5.82358	4.20146	0.0403893	0.432824	up	0	25	0	0	0	0	0	0	0	0	1.67959	8.28488	1.67959	1.67959	1.67959	1.67959	1.67959	1.67959	1.67959	1.67959	chr7	6042083	6042267	-	hsa_circ_0079318	circBase	NM_000535	PMS2	exonic	184
chr1:246743217-246755243+	5.31185	5.82358	4.20146	0.0403893	0.432824	up	0	25	0	0	0	0	0	0	0	0	1.67959	8.28488	1.67959	1.67959	1.67959	1.67959	1.67959	1.67959	1.67959	1.67959	chr1	246743216	246755243	+		novel	NM_152609	CNST	sense overlapping	12027
chr7:24659671-24681487+	5.31185	5.82358	4.20146	0.0403893	0.432824	up	0	25	0	0	0	0	0	0	0	0	1.67959	8.28488	1.67959	1.67959	1.67959	1.67959	1.67959	1.67959	1.67959	1.67959	chr7	24659670	24681487	+	hsa_circ_0079616	circBase	NM_016447	MPP6	exonic	441
chr17:27834914-27838010+	5.31185	5.82358	4.20146	0.0403893	0.432824	up	0	25	0	0	0	0	0	0	0	0	1.67959	8.28488	1.67959	1.67959	1.67959	1.67959	1.67959	1.67959	1.67959	1.67959	chr17	27834913	27838010	+	hsa_circ_0004800	circBase	NM_020791	TAOK1	exonic	366
chr13:77732072-77732244-	5.31086	5.82047	4.19068	0.0406467	0.432824	up	10	0	4	7	0	0	0	0	0	0	7.09632	1.67959	6.40915	6.61451	1.67959	1.67959	1.67959	1.67959	1.67959	1.67959	chr13	77732071	77732244	-	hsa_circ_0100893	circBase	NM_015057	MYCBP2	exonic	173
chr17:57148184-57161450-	5.31027	5.82014	4.18949	0.0406754	0.432824	up	4	1	4	12	0	0	0	0	0	0	5.82419	3.95891	6.40915	7.37233	1.67959	1.67959	1.67959	1.67959	1.67959	1.67959	chr17	57148183	57161450	-	hsa_circ_0004090	circBase	NM_015294	TRIM37	exonic	528
chr18:43577715-43591253-	5.30965	5.819	4.18552	0.0407708	0.432824	up	10	0	6	4	0	0	0	0	0	0	7.09632	1.67959	6.97588	5.84211	1.67959	1.67959	1.67959	1.67959	1.67959	1.67959	chr18	43577714	43591253	-		novel	NM_024430	PSTPIP2	exonic	395
chr1:171493960-171496983+	5.30766	5.81709	4.17875	0.0409339	0.432824	up	11	0	8	0	0	0	0	0	0	0	7.23075	1.67959	7.3817	1.67959	1.67959	1.67959	1.67959	1.67959	1.67959	1.67959	chr1	171493959	171496983	+	hsa_circ_0015215	circBase	NM_015172	PRRC2C	exonic	199
chr3:175599627-175599810-	5.30766	5.81709	4.17875	0.0409339	0.432824	up	11	0	8	0	0	0	0	0	0	0	7.23075	1.67959	7.3817	1.67959	1.67959	1.67959	1.67959	1.67959	1.67959	1.67959	chr3	175599626	175599810	-		novel			intergenic	184
chr13:21175844-21190018+	5.30766	5.81709	4.17875	0.0409339	0.432824	up	11	0	8	0	0	0	0	0	0	0	7.23075	1.67959	7.3817	1.67959	1.67959	1.67959	1.67959	1.67959	1.67959	1.67959	chr13	21175843	21190018	+	hsa_circ_0100024	circBase	NM_006531	IFT88	exonic	387
chr5:169679438-169694079-	5.30766	5.81709	4.17875	0.0409339	0.432824	up	11	0	8	0	0	0	0	0	0	0	7.23075	1.67959	7.3817	1.67959	1.67959	1.67959	1.67959	1.67959	1.67959	1.67959	chr5	169679437	169694079	-		novel	NM_005565	LCP2	exonic	702
chr12:64195871-64199184+	5.30766	5.81709	4.17875	0.0409339	0.432824	up	11	0	8	0	0	0	0	0	0	0	7.23075	1.67959	7.3817	1.67959	1.67959	1.67959	1.67959	1.67959	1.67959	1.67959	chr12	64195870	64199184	+	hsa_circ_0027379	circBase	NM_014254	TMEM5	exonic	486
chr19:34706029-34710782+	5.30766	5.81709	4.17875	0.0409339	0.432824	up	11	0	8	0	0	0	0	0	0	0	7.23075	1.67959	7.3817	1.67959	1.67959	1.67959	1.67959	1.67959	1.67959	1.67959	chr19	34706028	34710782	+		novel	NM_015578	LSM14A	exonic	598
chr12:96691756-96694138-	5.30766	5.81709	4.17875	0.0409339	0.432824	up	11	0	8	0	0	0	0	0	0	0	7.23075	1.67959	7.3817	1.67959	1.67959	1.67959	1.67959	1.67959	1.67959	1.67959	chr12	96691755	96694138	-		novel	NM_002595	CDK17	sense overlapping	2383
chr2:42922905-42950175+	5.30766	5.81709	4.17875	0.0409339	0.432824	up	11	0	8	0	0	0	0	0	0	0	7.23075	1.67959	7.3817	1.67959	1.67959	1.67959	1.67959	1.67959	1.67959	1.67959	chr2	42922904	42950175	+	hsa_circ_0054278	circBase	NM_001282755	MTA3	exonic	865
chr14:104422001-104441890+	5.30766	5.81709	4.17875	0.0409339	0.432824	up	11	0	8	0	0	0	0	0	0	0	7.23075	1.67959	7.3817	1.67959	1.67959	1.67959	1.67959	1.67959	1.67959	1.67959	chr14	104422000	104441890	+		novel	NM_153046	TDRD9	exonic	796
chr2:99217046-99220654-	5.30766	5.81709	4.17875	0.0409339	0.432824	up	11	0	8	0	0	0	0	0	0	0	7.23075	1.67959	7.3817	1.67959	1.67959	1.67959	1.67959	1.67959	1.67959	1.67959	chr2	99217045	99220654	-		novel	NM_001008215	COA5	sense overlapping	3609
chr7:148863250-148864022+	5.30766	5.81709	4.17875	0.0409339	0.432824	up	11	0	8	0	0	0	0	0	0	0	7.23075	1.67959	7.3817	1.67959	1.67959	1.67959	1.67959	1.67959	1.67959	1.67959	chr7	148863249	148864022	+	hsa_circ_0133668	circBase	NM_020781	ZNF398	exonic	241
chr10:120832953-120833449-	5.30729	5.81769	4.18078	0.0408848	0.432824	up	13	0	6	1	0	0	0	0	0	0	7.46702	1.67959	6.97588	4.06556	1.67959	1.67959	1.67959	1.67959	1.67959	1.67959	chr10	120832952	120833449	-	hsa_circ_0092866	circBase	NM_003750	EIF3A	exonic	328
chrX:153577316-153577760-	5.3065	5.81726	4.17921	0.0409229	0.432824	up	14	0	6	0	0	0	0	0	0	0	7.57207	1.67959	6.97588	1.67959	1.67959	1.67959	1.67959	1.67959	1.67959	1.67959	chrX	153577315	153577760	-		novel	ENST00000498411	FLNA	intronic	445
chr5:109049221-109091157+	5.3065	5.81726	4.17921	0.0409229	0.432824	up	14	0	6	0	0	0	0	0	0	0	7.57207	1.67959	6.97588	1.67959	1.67959	1.67959	1.67959	1.67959	1.67959	1.67959	chr5	109049220	109091157	+	hsa_circ_0127512	circBase	NM_002372	MAN2A1	exonic	700
chr21:40578062-40584633-	5.30579	5.8187	4.1841	0.0408049	0.432824	up	0	0	0	0	22	0	0	0	0	0	1.67959	1.67959	1.67959	1.67959	8.2833	1.67959	1.67959	1.67959	1.67959	1.67959	chr21	40578061	40584633	-		novel	NM_018963	BRWD1	sense overlapping	6572
chr15:35674023-35675038-	5.30579	5.8187	4.1841	0.0408049	0.432824	up	0	0	0	0	22	0	0	0	0	0	1.67959	1.67959	1.67959	1.67959	8.2833	1.67959	1.67959	1.67959	1.67959	1.67959	chr15	35674022	35675038	-		novel	NM_080650	DPH6	sense overlapping	1016
chr16:53307538-53308214+	5.30579	5.8187	4.1841	0.0408049	0.432824	up	0	0	0	0	22	0	0	0	0	0	1.67959	1.67959	1.67959	1.67959	8.2833	1.67959	1.67959	1.67959	1.67959	1.67959	chr16	53307537	53308214	+	hsa_circ_0105561	circBase	NM_025134	CHD9	exonic	250
chr15:39875830-39876610+	5.30579	5.8187	4.1841	0.0408049	0.432824	up	0	0	0	0	22	0	0	0	0	0	1.67959	1.67959	1.67959	1.67959	8.2833	1.67959	1.67959	1.67959	1.67959	1.67959	chr15	39875829	39876610	+		novel	NM_003246	THBS1	sense overlapping	781
chr7:77016677-77026732-	5.30579	5.8187	4.1841	0.0408049	0.432824	up	0	0	0	0	22	0	0	0	0	0	1.67959	1.67959	1.67959	1.67959	8.2833	1.67959	1.67959	1.67959	1.67959	1.67959	chr7	77016676	77026732	-		novel	NM_017439	GSAP	exonic	213
chr3:15071782-15076316+	5.30323	5.81833	4.18256	0.0408421	0.432824	up	0	15	0	9	0	0	0	0	0	0	1.67959	7.55776	1.67959	6.96656	1.67959	1.67959	1.67959	1.67959	1.67959	1.67959	chr3	15071781	15076316	+	hsa_circ_0064459	circBase	NM_003298	NR2C2	exonic	440
chrX:149761067-149787612+	5.30275	5.81518	4.17168	0.041105	0.432824	up	12	1	6	1	0	0	0	0	0	0	7.35372	3.95891	6.97588	4.06556	1.67959	1.67959	1.67959	1.67959	1.67959	1.67959	chrX	149761066	149787612	+	hsa_circ_0139897	circBase	NM_000252	MTM1	exonic	454
chr16:46708226-46711310-	5.30019	5.81441	4.16878	0.0411755	0.432824	up	8	8	5	0	0	0	0	0	0	0	6.78281	6.67217	6.72017	1.67959	1.67959	1.67959	1.67959	1.67959	1.67959	1.67959	chr16	46708225	46711310	-	hsa_circ_0002500	circBase	NM_018206	VPS35	exonic	440
chr11:101416592-101448221-	5.2965	6.75297	6.22423	0.0126013	0.432824	up	0	0	40	0	0	0	0	0	0	1	1.67959	1.67959	9.68129	1.67959	1.67959	1.67959	1.67959	1.67959	1.67959	4.03351	chr11	101416591	101448221	-		novel	ENST00000348423	TRPC6	intronic	31630
chr15:68467975-68468992+	5.28514	5.80641	4.13973	0.0418878	0.432824	up	4	0	3	14	0	0	0	0	0	0	5.82419	1.67959	6.01213	7.59074	1.67959	1.67959	1.67959	1.67959	1.67959	1.67959	chr15	68467974	68468992	+	hsa_circ_0104358	circBase	NM_016166	PIAS1	exonic	312
chr19:41850652-41854360-	5.28514	5.80641	4.13973	0.0418878	0.432824	up	4	0	3	14	0	0	0	0	0	0	5.82419	1.67959	6.01213	7.59074	1.67959	1.67959	1.67959	1.67959	1.67959	1.67959	chr19	41850651	41854360	-	hsa_circ_0051218	circBase	NM_000660	TGFB1	exonic	279
chr15:50596163-50601995-	5.28411	5.8057	4.13716	0.0419514	0.432824	up	10	5	4	2	0	0	0	0	0	0	7.09632	6.02104	6.40915	4.9205	1.67959	1.67959	1.67959	1.67959	1.67959	1.67959	chr15	50596162	50601995	-	hsa_circ_0035209	circBase	NM_002041	GABPB1	exonic	276
chr17:73951647-73952028-	5.28181	5.80655	4.13986	0.0418846	0.432824	up	0	19	0	5	0	0	0	0	0	0	1.67959	7.89362	1.67959	6.14783	1.67959	1.67959	1.67959	1.67959	1.67959	1.67959	chr17	73951646	73952028	-	hsa_circ_0008557	circBase	NM_004035	ACOX1	exonic	236
chr15:91524114-91525211-	5.28181	5.80655	4.13986	0.0418846	0.432824	up	0	19	0	5	0	0	0	0	0	0	1.67959	7.89362	1.67959	6.14783	1.67959	1.67959	1.67959	1.67959	1.67959	1.67959	chr15	91524113	91525211	-	hsa_circ_0036927	circBase	NM_003981	PRC1	exonic	555
chr10:65213156-65214849-	5.28069	5.80315	4.12804	0.0421781	0.432824	up	8	0	5	7	0	0	0	0	0	0	6.78281	1.67959	6.72017	6.61451	1.67959	1.67959	1.67959	1.67959	1.67959	1.67959	chr10	65213155	65214849	-	hsa_circ_0005658	circBase	ENST00000399251	JMJD1C	intronic	1694
chr10:75227311-75239275-	5.28069	5.80315	4.12804	0.0421781	0.432824	up	8	0	5	7	0	0	0	0	0	0	6.78281	1.67959	6.72017	6.61451	1.67959	1.67959	1.67959	1.67959	1.67959	1.67959	chr10	75227310	75239275	-	hsa_circ_0018815	circBase	NM_021132	PPP3CB	exonic	1023
chr11:46098305-46105853-	5.27874	5.8029	4.12697	0.0422048	0.432824	up	12	0	3	6	0	0	0	0	0	0	7.35372	1.67959	6.01213	6.39996	1.67959	1.67959	1.67959	1.67959	1.67959	1.67959	chr11	46098304	46105853	-	hsa_circ_0095866	circBase	NM_016621	PHF21A	exonic	236
chr17:46928451-46928990+	5.27622	5.79987	4.11629	0.0424722	0.432824	up	12	0	7	0	0	0	0	0	0	0	7.35372	1.67959	7.19301	1.67959	1.67959	1.67959	1.67959	1.67959	1.67959	1.67959	chr17	46928450	46928990	+	hsa_circ_0107019	circBase	NM_005831	CALCOCO2	exonic	159
chr19:47767860-47768203-	5.27622	5.79987	4.11629	0.0424722	0.432824	up	12	0	7	0	0	0	0	0	0	0	7.35372	1.67959	7.19301	1.67959	1.67959	1.67959	1.67959	1.67959	1.67959	1.67959	chr19	47767859	47768203	-		novel	NM_015603	CCDC9	antisense	344
chr4:151788823-151814301-	5.27622	5.79987	4.11629	0.0424722	0.432824	up	12	0	7	0	0	0	0	0	0	0	7.35372	1.67959	7.19301	1.67959	1.67959	1.67959	1.67959	1.67959	1.67959	1.67959	chr4	151788822	151814301	-	hsa_circ_0071234	circBase	NM_006726	LRBA	exonic	699
chr15:44907561-44949461-	5.27622	5.79987	4.11629	0.0424722	0.432824	up	12	0	7	0	0	0	0	0	0	0	7.35372	1.67959	7.19301	1.67959	1.67959	1.67959	1.67959	1.67959	1.67959	1.67959	chr15	44907560	44949461	-	hsa_circ_0103650	circBase	NM_025137	SPG11	sense overlapping	41901
chr10:124919923-124922344+	5.27622	5.79987	4.11629	0.0424722	0.432824	up	12	0	7	0	0	0	0	0	0	0	7.35372	1.67959	7.19301	1.67959	1.67959	1.67959	1.67959	1.67959	1.67959	1.67959	chr10	124919922	124922344	+		novel	NM_004725	BUB3	exonic	554
chr1:159889561-159890283-	5.27622	5.79987	4.11629	0.0424722	0.432824	up	12	0	7	0	0	0	0	0	0	0	7.35372	1.67959	7.19301	1.67959	1.67959	1.67959	1.67959	1.67959	1.67959	1.67959	chr1	159889560	159890283	-		novel	NM_003564	TAGLN2	sense overlapping	723
chr1:164648085-164648623+	5.27622	5.79987	4.11629	0.0424722	0.432824	up	12	0	7	0	0	0	0	0	0	0	7.35372	1.67959	7.19301	1.67959	1.67959	1.67959	1.67959	1.67959	1.67959	1.67959	chr1	164648084	164648623	+		novel	uc001gcu.1	AX748175	intronic	539
chr12:51019759-51054102-	5.27622	5.79987	4.11629	0.0424722	0.432824	up	12	0	7	0	0	0	0	0	0	0	7.35372	1.67959	7.19301	1.67959	1.67959	1.67959	1.67959	1.67959	1.67959	1.67959	chr12	51019758	51054102	-		novel	NM_173602	DIP2B	antisense	34344
chr10:24880816-24883968-	5.26979	5.79701	4.10575	0.0427375	0.432824	up	6	8	6	0	0	0	0	0	0	0	6.3817	6.67217	6.97588	1.67959	1.67959	1.67959	1.67959	1.67959	1.67959	1.67959	chr10	24880815	24883968	-	hsa_circ_0017979	circBase	NM_020824	ARHGAP21	exonic	216
chr2:26505713-26505919+	5.26472	5.79722	4.10594	0.0427328	0.432824	up	1	22	0	1	0	0	0	0	0	0	4.05022	8.10247	1.67959	4.06556	1.67959	1.67959	1.67959	1.67959	1.67959	1.67959	chr2	26505712	26505919	+	hsa_circ_0119637	circBase	NM_000183	HADHB	exonic	128
chr2:48869541-48898819+	5.26067	5.79328	4.09194	0.0430881	0.432824	up	3	0	1	0	17	0	0	0	0	0	5.43609	1.67959	4.56371	1.67959	7.91569	1.67959	1.67959	1.67959	1.67959	1.67959	chr2	48869540	48898819	+	hsa_circ_0120233	circBase	NM_006872	GTF2A1L	exonic	1082
chr16:53288350-53289691+	5.25874	5.79195	4.08715	0.0432103	0.432824	up	3	5	3	10	0	0	0	0	0	0	5.43609	6.02104	6.01213	7.11487	1.67959	1.67959	1.67959	1.67959	1.67959	1.67959	chr16	53288349	53289691	+		novel	NM_025134	CHD9	exonic	348
chr2:233599127-233599948+	5.25864	5.79288	4.09035	0.0431287	0.432824	up	0	0	0	22	0	0	0	0	0	0	1.67959	1.67959	1.67959	8.23407	1.67959	1.67959	1.67959	1.67959	1.67959	1.67959	chr2	233599126	233599948	+		novel	NM_015575	GIGYF2	exonic	154
chr14:102506573-102507010+	5.25637	6.49479	5.35047	0.0207167	0.432824	up	13	0	23	0	0	0	0	1	0	0	7.46702	1.67959	8.88708	1.67959	1.67959	1.67959	1.67959	3.39273	1.67959	1.67959	chr14	102506572	102507010	+	hsa_circ_0002398	circBase	NM_001376	DYNC1H1	exonic	251
chr1:174945215-174948027+	5.25458	5.79171	4.08585	0.0432436	0.432824	up	0	24	0	0	0	0	0	0	0	0	1.67959	8.2266	1.67959	1.67959	1.67959	1.67959	1.67959	1.67959	1.67959	1.67959	chr1	174945214	174948027	+		novel	NM_001243764	RABGAP1L	exonic	189
chr5:55251853-55253119-	5.24952	5.78626	4.06652	0.0437414	0.432824	up	8	0	4	8	0	0	0	0	0	0	6.78281	1.67959	6.40915	6.80125	1.67959	1.67959	1.67959	1.67959	1.67959	1.67959	chr5	55251852	55253119	-		novel	NM_002184	IL6ST	exonic	294
chr1:32653555-32653725+	5.24702	5.78474	4.06102	0.043884	0.432824	up	9	6	5	0	0	0	0	0	0	0	6.94807	6.27216	6.72017	1.67959	1.67959	1.67959	1.67959	1.67959	1.67959	1.67959	chr1	32653554	32653725	+	hsa_circ_0006994	circBase	NM_175852	TXLNA	exonic	171
chr17:58342773-58372162-	5.24658	5.78381	4.05776	0.0439689	0.432824	up	10	0	6	3	0	0	0	0	0	0	7.09632	1.67959	6.97588	5.45368	1.67959	1.67959	1.67959	1.67959	1.67959	1.67959	chr17	58342772	58372162	-	hsa_circ_0044949	circBase	NM_032582	USP32	exonic	698
chr17:27725246-27778698+	5.24609	5.7827	4.05386	0.0440706	0.432824	up	9	0	8	1	0	0	0	0	0	0	6.94807	1.67959	7.3817	4.06556	1.67959	1.67959	1.67959	1.67959	1.67959	1.67959	chr17	27725245	27778698	+		novel	NM_020791	TAOK1	sense overlapping	53453
chr3:170812793-170812948-	5.24527	5.78225	4.05222	0.0441132	0.432824	up	10	0	8	0	0	0	0	0	0	0	7.09632	1.67959	7.3817	1.67959	1.67959	1.67959	1.67959	1.67959	1.67959	1.67959	chr3	170812792	170812948	-		novel	ENST00000369326	TNIK	intronic	156
chr9:132848699-132854660+	5.24527	5.78225	4.05222	0.0441132	0.432824	up	10	0	8	0	0	0	0	0	0	0	7.09632	1.67959	7.3817	1.67959	1.67959	1.67959	1.67959	1.67959	1.67959	1.67959	chr9	132848698	132854660	+	hsa_circ_0138153	circBase	NM_020960	GPR107	exonic	299
chr3:138402520-138413749-	5.24527	5.78225	4.05222	0.0441132	0.432824	up	10	0	8	0	0	0	0	0	0	0	7.09632	1.67959	7.3817	1.67959	1.67959	1.67959	1.67959	1.67959	1.67959	1.67959	chr3	138402519	138413749	-	hsa_circ_0067526	circBase	NM_006219	PIK3CB	exonic	655
chr5:159679890-159686778-	5.24527	5.78225	4.05222	0.0441132	0.432824	up	10	0	8	0	0	0	0	0	0	0	7.09632	1.67959	7.3817	1.67959	1.67959	1.67959	1.67959	1.67959	1.67959	1.67959	chr5	159679889	159686778	-		novel	NM_024565	CCNJL	sense overlapping	6889
chr8:101232507-101245765+	5.24411	5.78247	4.05287	0.0440964	0.432824	up	13	0	6	0	0	0	0	0	0	0	7.46702	1.67959	6.97588	1.67959	1.67959	1.67959	1.67959	1.67959	1.67959	1.67959	chr8	101232506	101245765	+	hsa_circ_0135299	circBase	NM_003114	SPAG1	exonic	580
chr17:15569237-15569387-	5.24411	5.78247	4.05287	0.0440964	0.432824	up	13	0	6	0	0	0	0	0	0	0	7.46702	1.67959	6.97588	1.67959	1.67959	1.67959	1.67959	1.67959	1.67959	1.67959	chr17	15569236	15569387	-		novel	ENST00000416464	TRIM16	intronic	151
chr2:201283973-201284219+	5.24411	5.78247	4.05287	0.0440964	0.432824	up	13	0	6	0	0	0	0	0	0	0	7.46702	1.67959	6.97588	1.67959	1.67959	1.67959	1.67959	1.67959	1.67959	1.67959	chr2	201283972	201284219	+	hsa_circ_0003071	circBase	NM_015535	SPATS2L	exonic	247
chr1:36367549-36367938+	5.24411	5.78247	4.05287	0.0440964	0.432824	up	13	0	6	0	0	0	0	0	0	0	7.46702	1.67959	6.97588	1.67959	1.67959	1.67959	1.67959	1.67959	1.67959	1.67959	chr1	36367548	36367938	+	hsa_circ_0000052	circBase	NM_012199	AGO1	exonic	257	Cerebellar neurodegeneration, acute myeloid leukemia (AML), cardiac hypertrophy, epithelial ovarian cancer (EOC), esophageal cancer, non-alcoholic fatty liver disease (NAFLD), pancreatic cancer, pituitary adenoma, prostate cancer
chr2:174223440-174224219+	5.24411	5.78247	4.05287	0.0440964	0.432824	up	13	0	6	0	0	0	0	0	0	0	7.46702	1.67959	6.97588	1.67959	1.67959	1.67959	1.67959	1.67959	1.67959	1.67959	chr2	174223439	174224219	+	hsa_circ_0057123	circBase	NM_031942	CDCA7	exonic	363
chr1:16621278-16643066-	5.24411	5.78247	4.05287	0.0440964	0.432824	up	13	0	6	0	0	0	0	0	0	0	7.46702	1.67959	6.97588	1.67959	1.67959	1.67959	1.67959	1.67959	1.67959	1.67959	chr1	16621277	16643066	-		novel	NM_018994	FBXO42	sense overlapping	21789
chr3:47466975-47470160-	5.24044	5.78243	4.05234	0.0441101	0.432824	up	0	0	0	0	21	0	0	0	0	0	1.67959	1.67959	1.67959	1.67959	8.21689	1.67959	1.67959	1.67959	1.67959	1.67959	chr3	47466974	47470160	-	hsa_circ_0007291	circBase	NM_012235	SCAP	exonic	785
chr17:34034926-34050833+	5.24044	5.78243	4.05234	0.0441101	0.432824	up	0	0	0	0	21	0	0	0	0	0	1.67959	1.67959	1.67959	1.67959	8.21689	1.67959	1.67959	1.67959	1.67959	1.67959	chr17	34034925	34050833	+		novel	NM_001282	AP2B1	sense overlapping	15908
chr7:18535581-18633652+	5.24044	5.78243	4.05234	0.0441101	0.432824	up	0	0	0	0	21	0	0	0	0	0	1.67959	1.67959	1.67959	1.67959	8.21689	1.67959	1.67959	1.67959	1.67959	1.67959	chr7	18535580	18633652	+	hsa_circ_0133900	circBase	NM_058176	HDAC9	sense overlapping	98072
chr8:99718695-99740849-	5.24044	5.78243	4.05234	0.0441101	0.432824	up	0	0	0	0	21	0	0	0	0	0	1.67959	1.67959	1.67959	1.67959	8.21689	1.67959	1.67959	1.67959	1.67959	1.67959	chr8	99718694	99740849	-	hsa_circ_0137465	circBase	ENST00000518165	STK3	intronic	22155
chr19:55921241-55921685+	5.24044	5.78243	4.05234	0.0441101	0.432824	up	0	0	0	0	21	0	0	0	0	0	1.67959	1.67959	1.67959	1.67959	8.21689	1.67959	1.67959	1.67959	1.67959	1.67959	chr19	55921240	55921685	+		novel	T181310	G041724	sense overlapping	445
chr19:20806496-20808456-	5.24044	5.78243	4.05234	0.0441101	0.432824	up	0	0	0	0	21	0	0	0	0	0	1.67959	1.67959	1.67959	1.67959	8.21689	1.67959	1.67959	1.67959	1.67959	1.67959	chr19	20806495	20808456	-		novel	ENST00000595094	CTC-513N18.7	intronic	1961
chr15:23333849-23356220-	5.24044	5.78243	4.05234	0.0441101	0.432824	up	0	0	0	0	21	0	0	0	0	0	1.67959	1.67959	1.67959	1.67959	8.21689	1.67959	1.67959	1.67959	1.67959	1.67959	chr15	23333848	23356220	-	hsa_circ_0004154	circBase	NR_002824	HERC2P2	exonic	717
chr2:25830105-25830751-	5.23937	5.7799	4.04346	0.0443428	0.432824	up	12	1	6	0	0	0	0	0	0	0	7.35372	3.95891	6.97588	1.67959	1.67959	1.67959	1.67959	1.67959	1.67959	1.67959	chr2	25830104	25830751	-		PMID:25070500	ENST00000356599	DTNB	intronic	647
chr4:100848874-100849774-	5.23838	5.78005	4.04387	0.044332	0.432824	up	6	8	5	1	0	0	0	0	0	0	6.3817	6.67217	6.72017	4.06556	1.67959	1.67959	1.67959	1.67959	1.67959	1.67959	chr4	100848873	100849774	-		novel	ENST00000420137	DNAJB14	exonic	198
chr14:76633006-76662315+	5.23812	6.74117	6.06738	0.0137701	0.432824	up	29	0	19	2	0	0	1	0	0	0	8.61008	1.67959	8.6135	4.9205	1.67959	1.67959	4.12957	1.67959	1.67959	1.67959	chr14	76633005	76662315	+	hsa_circ_0005252	circBase	NM_017926	GPATCH2L	exonic	626
chr7:90585012-90613556+	5.23756	5.7796	4.04224	0.0443749	0.432824	up	7	8	5	0	0	0	0	0	0	0	6.59615	6.67217	6.72017	1.67959	1.67959	1.67959	1.67959	1.67959	1.67959	1.67959	chr7	90585011	90613556	+	hsa_circ_0008751	circBase	NM_001287135	CDK14	exonic	215
chrX:109263580-109266268+	5.23462	5.77732	4.03403	0.0445913	0.432824	up	11	2	6	0	0	0	0	0	0	0	7.23075	4.80209	6.97588	1.67959	1.67959	1.67959	1.67959	1.67959	1.67959	1.67959	chrX	109263579	109266268	+		novel	NM_017698	TMEM164	intronic	2689
chr1:165859441-165860559+	5.23381	5.77885	4.03926	0.0444534	0.432824	up	0	0	0	3	18	0	0	0	0	0	1.67959	1.67959	1.67959	5.45368	7.99709	1.67959	1.67959	1.67959	1.67959	1.67959	chr1	165859440	165860559	+	hsa_circ_0006758	circBase	NM_012474	UCK2	exonic	257
chr2:234098496-234102607+	5.22983	5.77696	4.03228	0.0446375	0.432824	up	4	16	2	0	0	0	0	0	0	0	5.82419	7.64933	5.46253	1.67959	1.67959	1.67959	1.67959	1.67959	1.67959	1.67959	chr2	234098495	234102607	+	hsa_circ_0058753	circBase	NM_005541	INPP5D	exonic	238
chr14:74398206-74398815+	5.22889	5.7773	4.03334	0.0446095	0.432824	up	0	17	0	6	0	0	0	0	0	0	1.67959	7.73544	1.67959	6.39996	1.67959	1.67959	1.67959	1.67959	1.67959	1.67959	chr14	74398205	74398815	+	hsa_circ_0006218	circBase	NM_021188	ZNF410	sense overlapping	610
chr1:21212694-21212864-	5.22759	5.77591	4.02841	0.0447402	0.432824	up	2	11	1	8	0	0	0	0	0	0	4.90353	7.11919	4.56371	6.80125	1.67959	1.67959	1.67959	1.67959	1.67959	1.67959	chr1	21212693	21212864	-		novel	NM_003760	EIF4G3	exonic	171
chr20:18513308-18523046+	5.22637	5.77399	4.02164	0.0449201	0.432824	up	2	0	2	0	16	0	0	0	0	0	4.90353	1.67959	5.46253	1.67959	7.82942	1.67959	1.67959	1.67959	1.67959	1.67959	chr20	18513307	18523046	+	hsa_circ_0059542	circBase	NM_006363	SEC23B	exonic	278
chr2:24360779-24384483+	5.2259	5.77259	4.01675	0.0450504	0.432824	up	8	4	6	1	0	0	0	0	0	0	6.78281	5.71679	6.97588	4.06556	1.67959	1.67959	1.67959	1.67959	1.67959	1.67959	chr2	24360778	24384483	+	hsa_circ_0119532	circBase	NM_001145710	FAM228B	exonic	626
chr3:127911535-127914172+	5.22103	5.77098	4.01066	0.0452135	0.432824	up	4	0	3	13	0	0	0	0	0	0	5.82419	1.67959	6.01213	7.48566	1.67959	1.67959	1.67959	1.67959	1.67959	1.67959	chr3	127911534	127914172	+	hsa_circ_0121811	circBase	ENST00000483457	EEFSEC	intronic	2638
chr16:11988811-11990642-	5.21773	5.76835	4.00117	0.0454687	0.432824	up	9	0	5	4	1	0	0	0	0	0	6.94807	1.67959	6.72017	5.84211	4.10593	1.67959	1.67959	1.67959	1.67959	1.67959	chr16	11988810	11990642	-	hsa_circ_0002161	circBase	NM_002094	GSPT1	exonic	262
chr14:50272739-50298079-	5.21766	5.77126	4.01123	0.0451981	0.432824	up	0	19	0	4	0	0	0	0	0	0	1.67959	7.89362	1.67959	5.84211	1.67959	1.67959	1.67959	1.67959	1.67959	1.67959	chr14	50272738	50298079	-	hsa_circ_0101952	circBase	uc001wxd.1	NEMF	exonic	955
chr4:106367540-106377902-	5.21633	6.46568	5.19979	0.0225896	0.432824	up	14	0	9	2	16	0	0	1	0	0	7.57207	1.67959	7.54855	4.9205	7.82942	1.67959	1.67959	3.39273	1.67959	1.67959	chr4	106367539	106377902	-	hsa_circ_0007477	circBase	NM_006903	PPA2	exonic	284
chr2:29150435-29170027+	5.21465	5.76669	3.99509	0.045633	0.432824	up	10	0	5	4	0	0	0	0	0	0	7.09632	1.67959	6.72017	5.84211	1.67959	1.67959	1.67959	1.67959	1.67959	1.67959	chr2	29150434	29170027	+		novel	NM_015131	WDR43	sense overlapping	19593
chr3:182740205-182743592-	5.21413	5.76553	3.99104	0.0457428	0.432824	up	9	0	7	2	0	0	0	0	0	0	6.94807	1.67959	7.19301	4.9205	1.67959	1.67959	1.67959	1.67959	1.67959	1.67959	chr3	182740204	182743592	-		novel	NM_020166	MCCC1	exonic	188
chr5:95099212-95119667+	5.21381	5.76624	3.99343	0.0456779	0.432824	up	11	0	5	3	0	0	0	0	0	0	7.23075	1.67959	6.72017	5.45368	1.67959	1.67959	1.67959	1.67959	1.67959	1.67959	chr5	95099211	95119667	+	hsa_circ_0006725	circBase	NM_014899	RHOBTB3	exonic	575
chr11:65267954-65268137+	5.21245	5.76463	3.98772	0.045833	0.432824	up	11	0	7	0	0	0	0	0	0	0	7.23075	1.67959	7.19301	1.67959	1.67959	1.67959	1.67959	1.67959	1.67959	1.67959	chr11	65267953	65268137	+		novel	GSE61474_TCONS_00050957	GSE61474_XLOC_010031	intronic	184
chr2:33135829-33135991-	5.21245	5.76463	3.98772	0.045833	0.432824	up	11	0	7	0	0	0	0	0	0	0	7.23075	1.67959	7.19301	1.67959	1.67959	1.67959	1.67959	1.67959	1.67959	1.67959	chr2	33135828	33135991	-		novel	NR_027098	LINC00486	antisense	163
chr15:50866834-50867986-	5.21245	5.76463	3.98772	0.045833	0.432824	up	11	0	7	0	0	0	0	0	0	0	7.23075	1.67959	7.19301	1.67959	1.67959	1.67959	1.67959	1.67959	1.67959	1.67959	chr15	50866833	50867986	-	hsa_circ_0103769	circBase	NM_017672	TRPM7	exonic	433
chrX:117512565-117521377+	5.21245	5.76463	3.98772	0.045833	0.432824	up	11	0	7	0	0	0	0	0	0	0	7.23075	1.67959	7.19301	1.67959	1.67959	1.67959	1.67959	1.67959	1.67959	1.67959	chrX	117512564	117521377	+		novel	NM_001184966	WDR44	intronic	8813
chr17:61882431-61884014+	5.21245	5.76463	3.98772	0.045833	0.432824	up	11	0	7	0	0	0	0	0	0	0	7.23075	1.67959	7.19301	1.67959	1.67959	1.67959	1.67959	1.67959	1.67959	1.67959	chr17	61882430	61884014	+	hsa_circ_0045234	circBase	NM_007372	DDX42	exonic	225
chr15:63964695-63967292-	5.21245	5.76463	3.98772	0.045833	0.432824	up	11	0	7	0	0	0	0	0	0	0	7.23075	1.67959	7.19301	1.67959	1.67959	1.67959	1.67959	1.67959	1.67959	1.67959	chr15	63964694	63967292	-	hsa_circ_0104144	circBase	NM_003922	HERC1	sense overlapping	2598
chr2:219445284-219457430+	5.21245	5.76463	3.98772	0.045833	0.432824	up	11	0	7	0	0	0	0	0	0	0	7.23075	1.67959	7.19301	1.67959	1.67959	1.67959	1.67959	1.67959	1.67959	1.67959	chr2	219445283	219457430	+	hsa_circ_0006745	circBase	NM_005444	RQCD1	exonic	707
chr17:18692666-18707579+	5.21245	5.76463	3.98772	0.045833	0.432824	up	11	0	7	0	0	0	0	0	0	0	7.23075	1.67959	7.19301	1.67959	1.67959	1.67959	1.67959	1.67959	1.67959	1.67959	chr17	18692665	18707579	+	hsa_circ_0005304	circBase	NM_016078	TVP23B	exonic	579
chr12:110345331-110346742+	5.21245	5.76463	3.98772	0.045833	0.432824	up	11	0	7	0	0	0	0	0	0	0	7.23075	1.67959	7.19301	1.67959	1.67959	1.67959	1.67959	1.67959	1.67959	1.67959	chr12	110345330	110346742	+		novel	NM_032300	TCHP	exonic	354
chr7:111012505-111012669+	5.21245	5.76463	3.98772	0.045833	0.432824	up	11	0	7	0	0	0	0	0	0	0	7.23075	1.67959	7.19301	1.67959	1.67959	1.67959	1.67959	1.67959	1.67959	1.67959	chr7	111012504	111012669	+		novel	NM_032549	IMMP2L	antisense	165
chr10:113104420-113120275+	5.21245	5.76463	3.98772	0.045833	0.432824	up	11	0	7	0	0	0	0	0	0	0	7.23075	1.67959	7.19301	1.67959	1.67959	1.67959	1.67959	1.67959	1.67959	1.67959	chr10	113104419	113120275	+		novel	T048632	G011350	sense overlapping	15856
chr3:124374448-124376650+	5.21245	5.76463	3.98772	0.045833	0.432824	up	11	0	7	0	0	0	0	0	0	0	7.23075	1.67959	7.19301	1.67959	1.67959	1.67959	1.67959	1.67959	1.67959	1.67959	chr3	124374447	124376650	+		novel	NM_007064	KALRN	exonic	241
chr20:35177709-35178031+	5.21245	5.76463	3.98772	0.045833	0.432824	up	11	0	7	0	0	0	0	0	0	0	7.23075	1.67959	7.19301	1.67959	1.67959	1.67959	1.67959	1.67959	1.67959	1.67959	chr20	35177708	35178031	+		novel	NM_006097	MYL9	sense overlapping	323
chr12:25241034-25243131+	5.20634	5.76519	3.989	0.0457983	0.432824	up	0	21	0	2	0	0	0	0	0	0	1.67959	8.03616	1.67959	4.9205	1.67959	1.67959	1.67959	1.67959	1.67959	1.67959	chr12	25241033	25243131	+		novel	NM_006152	LRMP	exonic	291
chr14:92264129-92268765-	5.20543	6.4581	5.16174	0.0230897	0.432824	up	0	0	0	2	42	0	0	1	0	0	1.67959	1.67959	1.67959	4.9205	9.20911	1.67959	1.67959	3.39273	1.67959	1.67959	chr14	92264128	92268765	-	hsa_circ_0032969	circBase	ENST00000340892	TC2N	exonic	554
chr13:42439872-42442613-	5.20317	5.76139	3.97548	0.0461672	0.432824	up	5	3	3	9	0	0	0	0	0	0	6.12971	5.33075	6.01213	6.96656	1.67959	1.67959	1.67959	1.67959	1.67959	1.67959	chr13	42439871	42442613	-	hsa_circ_0000478	circBase	NM_015058	VWA8	exonic	345	ovarian cancer (OC), psoriasis
chr4:107092252-107154221-	5.19493	5.75911	3.96665	0.0464101	0.432824	up	0	23	0	0	0	0	0	0	0	0	1.67959	8.16587	1.67959	1.67959	1.67959	1.67959	1.67959	1.67959	1.67959	1.67959	chr4	107092251	107154221	-	hsa_circ_0124961	circBase	NM_001290768	TBCK	exonic	723
chr14:52485779-52487342-	5.19493	5.75911	3.96665	0.0464101	0.432824	up	0	23	0	0	0	0	0	0	0	0	1.67959	8.16587	1.67959	1.67959	1.67959	1.67959	1.67959	1.67959	1.67959	1.67959	chr14	52485778	52487342	-		novel	NM_007361	NID2	sense overlapping	1564
chr16:17548979-17552647-	5.19493	5.75911	3.96665	0.0464101	0.432824	up	0	23	0	0	0	0	0	0	0	0	1.67959	8.16587	1.67959	1.67959	1.67959	1.67959	1.67959	1.67959	1.67959	1.67959	chr16	17548978	17552647	-		novel	NM_022166	XYLT1	intronic	3669
chr3:121186366-121191011-	5.19493	5.75911	3.96665	0.0464101	0.432824	up	0	23	0	0	0	0	0	0	0	0	1.67959	8.16587	1.67959	1.67959	1.67959	1.67959	1.67959	1.67959	1.67959	1.67959	chr3	121186365	121191011	-		novel	NM_199420	POLQ	exonic	424
chr3:9839343-9843440+	5.19493	5.75911	3.96665	0.0464101	0.432824	up	0	23	0	0	0	0	0	0	0	0	1.67959	8.16587	1.67959	1.67959	1.67959	1.67959	1.67959	1.67959	1.67959	1.67959	chr3	9839342	9843440	+	hsa_circ_0004355	circBase	NM_005718	ARPC4	exonic	327
chr3:28293203-28304871+	5.19027	5.75466	3.95071	0.0468516	0.432824	up	2	0	2	16	0	0	0	0	0	0	4.90353	1.67959	5.46253	7.78038	1.67959	1.67959	1.67959	1.67959	1.67959	1.67959	chr3	28293202	28304871	+	hsa_circ_0008669	circBase	ENST00000423894	CMC1	intronic	11669
chr1:95702904-95705465+	5.18881	5.75444	3.94977	0.0468777	0.432824	up	8	11	2	0	0	0	0	0	0	0	6.78281	7.11919	5.46253	1.67959	1.67959	1.67959	1.67959	1.67959	1.67959	1.67959	chr1	95702903	95705465	+		novel	ENST00000492639	RWDD3	exonic	246
chr15:30766559-30773110+	5.1869	5.75182	3.94046	0.0471379	0.432824	up	9	5	5	0	0	0	0	0	0	0	6.94807	6.02104	6.72017	1.67959	1.67959	1.67959	1.67959	1.67959	1.67959	1.67959	chr15	30766558	30773110	+		novel	ENST00000399971	CTD-3092A11.1	exonic	666
chr12:110463547-110468563+	5.18374	5.7503	3.93483	0.047296	0.432824	up	8	0	4	7	0	0	0	0	0	0	6.78281	1.67959	6.40915	6.61451	1.67959	1.67959	1.67959	1.67959	1.67959	1.67959	chr12	110463546	110468563	+	hsa_circ_0028166	circBase	NM_033121	ANKRD13A	exonic	547
chr6:6174813-6251162-	5.18358	5.74568	3.91877	0.0477497	0.432824	up	0	0	14	0	0	0	0	0	0	0	1.67959	1.67959	8.17713	1.67959	1.67959	1.67959	1.67959	1.67959	1.67959	1.67959	chr6	6174812	6251162	-		novel	NM_000129	F13A1	exonic	1176
chr9:127791923-127797019-	5.18358	5.74568	3.91877	0.0477497	0.432824	up	0	0	14	0	0	0	0	0	0	0	1.67959	1.67959	8.17713	1.67959	1.67959	1.67959	1.67959	1.67959	1.67959	1.67959	chr9	127791922	127797019	-		novel	NM_173690	SCAI	sense overlapping	5097
chr2:68592321-68621308+	5.18233	5.74865	3.92895	0.0474616	0.432824	up	8	0	6	4	0	0	0	0	0	0	6.78281	1.67959	6.97588	5.84211	1.67959	1.67959	1.67959	1.67959	1.67959	1.67959	chr2	68592320	68621308	+		novel	T191074	G044007	exonic	1079
chr4:174305802-174325101+	5.18233	5.74865	3.92895	0.0474616	0.432824	up	8	0	6	4	0	0	0	0	0	0	6.78281	1.67959	6.97588	5.84211	1.67959	1.67959	1.67959	1.67959	1.67959	1.67959	chr4	174305801	174325101	+	hsa_circ_0125797	circBase	T274514	G063812	sense overlapping	19300
chr3:37038110-37045965+	5.18198	5.74919	3.93079	0.0474097	0.432824	up	8	6	5	0	0	0	0	0	0	0	6.78281	6.27216	6.72017	1.67959	1.67959	1.67959	1.67959	1.67959	1.67959	1.67959	chr3	37038109	37045965	+	hsa_circ_0064818	circBase	NM_000249	MLH1	exonic	264
chrM:14414-15491-	5.18006	5.74653	3.92136	0.0476764	0.432824	up	9	0	8	0	0	0	0	0	0	0	6.94807	1.67959	7.3817	1.67959	1.67959	1.67959	1.67959	1.67959	1.67959	1.67959	chrM	14413	15491	-		novel	uc022bqs.1	JA760602	intronic	1078
chr3:87871158-87883206+	5.17889	5.74682	3.92221	0.0476522	0.432824	up	12	0	6	0	0	0	0	0	0	0	7.35372	1.67959	6.97588	1.67959	1.67959	1.67959	1.67959	1.67959	1.67959	1.67959	chr3	87871157	87883206	+		novel	T246191	G056568	antisense	12049
chr8:36474506-36474662+	5.17889	5.74682	3.92221	0.0476522	0.432824	up	12	0	6	0	0	0	0	0	0	0	7.35372	1.67959	6.97588	1.67959	1.67959	1.67959	1.67959	1.67959	1.67959	1.67959	chr8	36474505	36474662	+		novel	ENST00000524132	RP11-962G15.1	antisense	157
chr21:33825620-33830028-	5.17889	5.74682	3.92221	0.0476522	0.432824	up	12	0	6	0	0	0	0	0	0	0	7.35372	1.67959	6.97588	1.67959	1.67959	1.67959	1.67959	1.67959	1.67959	1.67959	chr21	33825619	33830028	-		novel	NM_058187	EVA1C	antisense	4409
chr6:76330009-76344527+	5.17889	5.74682	3.92221	0.0476522	0.432824	up	12	0	6	0	0	0	0	0	0	0	7.35372	1.67959	6.97588	1.67959	1.67959	1.67959	1.67959	1.67959	1.67959	1.67959	chr6	76330008	76344527	+		novel	NM_015571	SENP6	sense overlapping	14519
chr9:36352739-36353328+	5.17889	5.74682	3.92221	0.0476522	0.432824	up	12	0	6	0	0	0	0	0	0	0	7.35372	1.67959	6.97588	1.67959	1.67959	1.67959	1.67959	1.67959	1.67959	1.67959	chr9	36352738	36353328	+		novel	T358077	G084476	intronic	590
chr1:63269390-63307218+	5.17713	5.74894	3.92938	0.0474493	0.432824	up	1	20	1	0	0	0	0	0	0	0	4.05022	7.96665	4.56371	1.67959	1.67959	1.67959	1.67959	1.67959	1.67959	1.67959	chr1	63269389	63307218	+	hsa_circ_0012824	circBase	NM_032852	ATG4C	exonic	1277
chr2:135957978-135960533-	5.172	5.74523	3.91592	0.0478309	0.432824	up	0	0	0	0	20	0	0	0	0	0	1.67959	1.67959	1.67959	1.67959	8.14728	1.67959	1.67959	1.67959	1.67959	1.67959	chr2	135957977	135960533	-		novel	NM_032143	ZRANB3	sense overlapping	2556
chr10:58504118-58504267+	5.172	5.74523	3.91592	0.0478309	0.432824	up	0	0	0	0	20	0	0	0	0	0	1.67959	1.67959	1.67959	1.67959	8.14728	1.67959	1.67959	1.67959	1.67959	1.67959	chr10	58504117	58504267	+		novel	T042365	G009715	intronic	150
chr10:115403268-115403432-	5.172	5.74523	3.91592	0.0478309	0.432824	up	0	0	0	0	20	0	0	0	0	0	1.67959	1.67959	1.67959	1.67959	8.14728	1.67959	1.67959	1.67959	1.67959	1.67959	chr10	115403267	115403432	-		novel	ENST00000369358	NRAP	intronic	165
chr17:25628814-25631937+	5.172	5.74523	3.91592	0.0478309	0.432824	up	0	0	0	0	20	0	0	0	0	0	1.67959	1.67959	1.67959	1.67959	8.14728	1.67959	1.67959	1.67959	1.67959	1.67959	chr17	25628813	25631937	+	hsa_circ_0042488	circBase	NM_015626	WSB1	exonic	570
chr4:99955381-99966461+	5.172	5.74523	3.91592	0.0478309	0.432824	up	0	0	0	0	20	0	0	0	0	0	1.67959	1.67959	1.67959	1.67959	8.14728	1.67959	1.67959	1.67959	1.67959	1.67959	chr4	99955380	99966461	+	hsa_circ_0070495	circBase	NM_015143	METAP1	exonic	621
chr4:110629611-110647761-	5.172	5.74523	3.91592	0.0478309	0.432824	up	0	0	0	0	20	0	0	0	0	0	1.67959	1.67959	1.67959	1.67959	8.14728	1.67959	1.67959	1.67959	1.67959	1.67959	chr4	110629610	110647761	-		novel	NM_030821	PLA2G12A	sense overlapping	18151
chr7:90708747-90747523+	5.172	5.74523	3.91592	0.0478309	0.432824	up	0	0	0	0	20	0	0	0	0	0	1.67959	1.67959	1.67959	1.67959	8.14728	1.67959	1.67959	1.67959	1.67959	1.67959	chr7	90708746	90747523	+	hsa_circ_0134993	circBase	NM_001287135	CDK14	exonic	333
chr18:8085669-8088849+	5.172	5.74523	3.91592	0.0478309	0.432824	up	0	0	0	0	20	0	0	0	0	0	1.67959	1.67959	1.67959	1.67959	8.14728	1.67959	1.67959	1.67959	1.67959	1.67959	chr18	8085668	8088849	+	hsa_circ_0046808	circBase	NM_002845	PTPRM	exonic	305
chr15:40920268-40943017+	5.172	5.74523	3.91592	0.0478309	0.432824	up	0	0	0	0	20	0	0	0	0	0	1.67959	1.67959	1.67959	1.67959	8.14728	1.67959	1.67959	1.67959	1.67959	1.67959	chr15	40920267	40943017	+	hsa_circ_0103435	circBase	NM_144508	CASC5	sense overlapping	22750
chr4:148886175-148887990+	5.1671	5.74128	3.90164	0.048239	0.432824	up	5	9	5	0	0	0	0	0	0	0	6.12971	6.83705	6.72017	1.67959	1.67959	1.67959	1.67959	1.67959	1.67959	1.67959	chr4	148886174	148887990	+		PMID:25242744	NM_024605	ARHGAP10	exonic	266
chrX:80532483-80553856+	5.1644	5.74183	3.90322	0.0481938	0.432824	up	0	5	0	16	0	0	0	0	0	0	1.67959	6.02104	1.67959	7.78038	1.67959	1.67959	1.67959	1.67959	1.67959	1.67959	chrX	80532482	80553856	+	hsa_circ_0140647	circBase	NM_003022	SH3BGRL	sense overlapping	21374
chr2:120684174-120702816+	5.15052	5.73508	3.87817	0.048918	0.432824	up	0	19	0	3	0	0	0	0	0	0	1.67959	7.89362	1.67959	5.45368	1.67959	1.67959	1.67959	1.67959	1.67959	1.67959	chr2	120684173	120702816	+	hsa_circ_0056248	circBase	NM_002830	PTPN4	exonic	514
chr1:51926763-51929470-	5.14895	5.73112	3.86422	0.0493261	0.432824	up	8	0	5	5	0	0	0	0	0	0	6.78281	1.67959	6.72017	6.14783	1.67959	1.67959	1.67959	1.67959	1.67959	1.67959	chr1	51926762	51929470	-	hsa_circ_0012448	circBase	NM_001981	EPS15	exonic	186
chr10:70136610-70145885-	5.14807	5.73066	3.86251	0.0493764	0.432824	up	9	0	5	4	0	0	0	0	0	0	6.94807	1.67959	6.72017	5.84211	1.67959	1.67959	1.67959	1.67959	1.67959	1.67959	chr10	70136609	70145885	-	hsa_circ_0093940	circBase	NM_017987	RUFY2	exonic	675
chr15:67923226-67956983+	5.14674	5.73253	3.86886	0.0491899	0.432824	up	0	8	0	13	0	0	0	0	0	0	1.67959	6.67217	1.67959	7.48566	1.67959	1.67959	1.67959	1.67959	1.67959	1.67959	chr15	67923225	67956983	+		novel	NM_002757	MAP2K5	exonic	302
chr11:46801744-46810323-	5.14572	5.72849	3.85479	0.0496041	0.432824	up	10	0	7	0	0	0	0	0	0	0	7.09632	1.67959	7.19301	1.67959	1.67959	1.67959	1.67959	1.67959	1.67959	1.67959	chr11	46801743	46810323	-	hsa_circ_0095888	circBase	NM_014756	CKAP5	exonic	558
chr9:4884162-4884713+	5.14572	5.72849	3.85479	0.0496041	0.432824	up	10	0	7	0	0	0	0	0	0	0	7.09632	1.67959	7.19301	1.67959	1.67959	1.67959	1.67959	1.67959	1.67959	1.67959	chr9	4884161	4884713	+		novel	uc003ziv.1	AK021739	sense overlapping	552
chr12:97204453-97204618+	5.14572	5.72849	3.85479	0.0496041	0.432824	up	10	0	7	0	0	0	0	0	0	0	7.09632	1.67959	7.19301	1.67959	1.67959	1.67959	1.67959	1.67959	1.67959	1.67959	chr12	97204452	97204618	+		novel	NM_001306084	CFAP54	intronic	166
chr2:101182965-101186183+	5.14572	5.72849	3.85479	0.0496041	0.432824	up	10	0	7	0	0	0	0	0	0	0	7.09632	1.67959	7.19301	1.67959	1.67959	1.67959	1.67959	1.67959	1.67959	1.67959	chr2	101182964	101186183	+		novel	NM_024065	PDCL3	exonic	362
chr3:52685758-52713742-	5.14572	5.72849	3.85479	0.0496041	0.432824	up	10	0	7	0	0	0	0	0	0	0	7.09632	1.67959	7.19301	1.67959	1.67959	1.67959	1.67959	1.67959	1.67959	1.67959	chr3	52685757	52713742	-	hsa_circ_0124169	circBase	NM_018313	PBRM1	sense overlapping	27985
chr22:36682764-36688115-	5.14572	5.72849	3.85479	0.0496041	0.432824	up	10	0	7	0	0	0	0	0	0	0	7.09632	1.67959	7.19301	1.67959	1.67959	1.67959	1.67959	1.67959	1.67959	1.67959	chr22	36682763	36688115	-		novel	NM_002473	MYH9	sense overlapping	5352
chr5:2839989-2840144+	5.14572	5.72849	3.85479	0.0496041	0.432824	up	10	0	7	0	0	0	0	0	0	0	7.09632	1.67959	7.19301	1.67959	1.67959	1.67959	1.67959	1.67959	1.67959	1.67959	chr5	2839988	2840144	+		novel			intergenic	156
chr1:185143504-185144245+	5.14572	5.72849	3.85479	0.0496041	0.432824	up	10	0	7	0	0	0	0	0	0	0	7.09632	1.67959	7.19301	1.67959	1.67959	1.67959	1.67959	1.67959	1.67959	1.67959	chr1	185143503	185144245	+	hsa_circ_0111471	circBase	NM_017673	SWT1	exonic	742
chr2:70062987-70063153+	5.14572	5.72849	3.85479	0.0496041	0.432824	up	10	0	7	0	0	0	0	0	0	0	7.09632	1.67959	7.19301	1.67959	1.67959	1.67959	1.67959	1.67959	1.67959	1.67959	chr2	70062986	70063153	+		novel	ENST00000468386	GMCL1	intronic	167
chr7:43129891-43130075-	5.14572	5.72849	3.85479	0.0496041	0.432824	up	10	0	7	0	0	0	0	0	0	0	7.09632	1.67959	7.19301	1.67959	1.67959	1.67959	1.67959	1.67959	1.67959	1.67959	chr7	43129890	43130075	-		novel			intergenic	185
chr14:39597484-39601272+	5.14456	5.72881	3.85566	0.0495783	0.432824	up	13	0	5	0	0	0	0	0	0	0	7.46702	1.67959	6.72017	1.67959	1.67959	1.67959	1.67959	1.67959	1.67959	1.67959	chr14	39597483	39601272	+		novel	NM_003616	GEMIN2	exonic	180
chr3:47163873-47164035-	5.14456	5.72881	3.85566	0.0495783	0.432824	up	13	0	5	0	0	0	0	0	0	0	7.46702	1.67959	6.72017	1.67959	1.67959	1.67959	1.67959	1.67959	1.67959	1.67959	chr3	47163872	47164035	-		novel	NM_014159	SETD2	sense overlapping	163
chr6:34261228-34263462-	5.14456	5.72881	3.85566	0.0495783	0.432824	up	13	0	5	0	0	0	0	0	0	0	7.46702	1.67959	6.72017	1.67959	1.67959	1.67959	1.67959	1.67959	1.67959	1.67959	chr6	34261227	34263462	-	hsa_circ_0131638	circBase	NM_006703	NUDT3	exonic	130
chr12:19406874-19410471+	5.14284	5.73106	3.86329	0.0493536	0.432824	up	2	20	0	0	0	0	0	0	0	0	4.90353	7.96665	1.67959	1.67959	1.67959	1.67959	1.67959	1.67959	1.67959	1.67959	chr12	19406873	19410471	+	hsa_circ_0006657	circBase	NM_019012	PLEKHA5	exonic	310
chr7:16317754-16348252-	5.14268	5.72857	3.85467	0.0496076	0.432824	up	8	7	4	0	0	0	0	0	0	0	6.78281	6.48599	6.40915	1.67959	1.67959	1.67959	1.67959	1.67959	1.67959	1.67959	chr7	16317753	16348252	-	hsa_circ_0079483	circBase	NM_001101417	ISPD	exonic	249
chr1:150413399-150416853+	5.1327	5.72575	3.8448	0.0499003	0.432824	up	0	22	0	0	0	0	0	0	0	0	1.67959	8.10247	1.67959	1.67959	1.67959	1.67959	1.67959	1.67959	1.67959	1.67959	chr1	150413398	150416853	+	hsa_circ_0004437	circBase	NM_015203	RPRD2	exonic	359
chr5:80769519-80809536-	5.1327	5.72575	3.8448	0.0499003	0.432824	up	0	22	0	0	0	0	0	0	0	0	1.67959	8.10247	1.67959	1.67959	1.67959	1.67959	1.67959	1.67959	1.67959	1.67959	chr5	80769518	80809536	-	hsa_circ_0129831	circBase	NM_012446	SSBP2	exonic	288
chr15:57523350-57565460+	5.1327	5.72575	3.8448	0.0499003	0.432824	up	0	22	0	0	0	0	0	0	0	0	1.67959	8.10247	1.67959	1.67959	1.67959	1.67959	1.67959	1.67959	1.67959	1.67959	chr15	57523349	57565460	+		novel	NM_003205	TCF12	exonic	1327
chr7:151891094-151904513-	5.11613	7.03108	6.94074	0.00842542	0.432824	up	23	35	13	2	0	2	0	0	0	0	8.27874	8.76607	8.07145	4.9205	1.67959	4.56125	1.67959	1.67959	1.67959	1.67959	chr7	151891093	151904513	-	hsa_circ_0083004	circBase	NM_170606	KMT2C	exonic	948
chr8:131130407-131138335-	5.05698	6.34938	4.59995	0.031973	0.432824	up	12	18	7	2	0	0	0	1	0	0	7.35372	7.8167	7.19301	4.9205	1.67959	1.67959	1.67959	3.39273	1.67959	1.67959	chr8	131130406	131138335	-	hsa_circ_0003244	circBase	NM_018482	ASAP1	exonic	499
chr16:1682213-1691188+	5.00782	6.31529	4.43009	0.0353106	0.432824	up	0	43	0	0	0	0	0	1	0	0	1.67959	9.06107	1.67959	1.67959	1.67959	1.67959	1.67959	3.39273	1.67959	1.67959	chr16	1682212	1691188	+	hsa_circ_0037322	circBase	NM_020825	CRAMP1L	exonic	287
chr10:52220433-52226692-	5.00426	6.31113	4.40681	0.0357956	0.432824	up	17	6	10	2	0	0	0	1	0	0	7.84788	6.27216	7.69808	4.9205	1.67959	1.67959	1.67959	3.39273	1.67959	1.67959	chr10	52220432	52226692	-	hsa_circ_0018402	circBase	NM_147156	SGMS1	exonic	185
chr3:101371340-101371782-	4.96668	6.28473	4.27601	0.038654	0.432824	up	17	7	8	3	0	0	0	1	0	0	7.84788	6.48599	7.3817	5.45368	1.67959	1.67959	1.67959	3.39273	1.67959	1.67959	chr3	101371339	101371782	-	hsa_circ_0121358	circBase	NM_014415	ZBTB11	exonic	335
chr9:19316415-19316837+	4.95903	6.50787	4.85636	0.0275444	0.432824	up	1	2	0	0	43	0	0	0	0	1	4.05022	4.80209	1.67959	1.67959	9.24287	1.67959	1.67959	1.67959	1.67959	4.03351	chr9	19316414	19316837	+	hsa_circ_0086466	circBase	NM_017925	DENND4C	exonic	320
chr9:33068822-33071890-	4.93924	6.26536	4.18056	0.0408901	0.432824	up	16	6	8	0	4	0	0	1	0	0	7.76167	6.27216	7.3817	1.67959	5.88913	1.67959	1.67959	3.39273	1.67959	1.67959	chr9	33068821	33071890	-	hsa_circ_0002328	circBase	NM_018225	SMU1	exonic	264
chr14:31392416-31398517-	4.90934	7.40674	7.79659	0.0052345	0.432824	up	0	0	69	0	0	0	0	0	0	3	1.67959	1.67959	10.4655	1.67959	1.67959	1.67959	1.67959	1.67959	1.67959	5.41688	chr14	31392415	31398517	-		novel	NM_014574	STRN3	intronic	6102
chr1:84644860-84680000+	4.9054	6.67555	5.36713	0.0205197	0.432824	up	11	39	6	0	0	0	0	2	0	0	7.23075	8.9211	6.97588	1.67959	1.67959	1.67959	1.67959	4.15401	1.67959	1.67959	chr1	84644859	84680000	+	hsa_circ_0004083	circBase	NM_182948	PRKACB	exonic	884
chr7:148809229-148815440-	4.8932	6.99921	6.32657	0.0118942	0.432824	up	21	3	11	14	19	0	0	0	0	2	8.14891	5.33075	7.83356	7.59074	8.07414	1.67959	1.67959	1.67959	1.67959	4.88501	chr7	148809228	148815440	-	hsa_circ_0001767	circBase	NM_001001661	ZNF425	exonic	286
chr19:10274002-10277361-	4.85541	6.20747	3.91795	0.0477731	0.432824	up	9	6	7	1	9	0	0	1	0	0	6.94807	6.27216	7.19301	4.06556	7.01507	1.67959	1.67959	3.39273	1.67959	1.67959	chr19	10274001	10277361	-		novel	NM_001379	DNMT1	exonic	123
chr1:145897085-145900490+	4.82161	6.44505	4.45561	0.0347868	0.432824	up	2	23	0	11	10	0	1	0	0	0	4.90353	8.16587	1.67959	7.24934	7.16349	1.67959	4.12957	1.67959	1.67959	1.67959	chr1	145897084	145900490	+	hsa_circ_0008553	circBase	ENST00000422044	GPR89C	exonic	809
chr8:68030483-68049838+	4.72093	6.34382	4.03996	0.0444349	0.432824	up	3	0	2	0	33	0	0	0	0	1	5.43609	1.67959	5.46253	1.67959	8.86331	1.67959	1.67959	1.67959	1.67959	4.03351	chr8	68030482	68049838	+	hsa_circ_0084678	circBase	NM_024790	CSPP1	exonic	479
chr10:98303833-98325183-	4.68305	6.31874	3.92024	0.0477081	0.432824	up	5	16	3	15	0	0	0	0	0	1	6.12971	7.64933	6.01213	7.68867	1.67959	1.67959	1.67959	1.67959	1.67959	4.03351	chr10	98303832	98325183	-	hsa_circ_0005801	circBase	NM_020123	TM9SF3	exonic	887
chr2:171862657-171917666-	4.66145	6.4891	4.40786	0.0357737	0.432824	up	0	0	0	7	38	0	0	2	0	0	1.67959	1.67959	1.67959	6.61451	9.06554	1.67959	1.67959	4.15401	1.67959	1.67959	chr2	171862656	171917666	-	hsa_circ_0057024	circBase	NM_012290	TLK1	exonic	1574
chr10:94243012-94267962-	4.56604	7.68885	8.08208	0.0044705	0.432824	up	0	0	86	0	0	0	0	8	0	0	1.67959	1.67959	10.7826	1.67959	1.67959	1.67959	1.67959	5.94486	1.67959	1.67959	chr10	94243011	94267962	-	hsa_circ_0094466	circBase	NM_004969	IDE	exonic	679
chr6:137015278-137041727-	4.54532	6.96503	5.66581	0.0172988	0.432824	up	16	36	9	9	0	0	0	4	0	0	7.76167	8.80641	7.54855	6.96656	1.67959	1.67959	1.67959	5.018	1.67959	1.67959	chr6	137015277	137041727	-	hsa_circ_0007798	circBase	NM_005923	MAP3K5	exonic	805
chr7:37052904-37073017-	4.50888	7.45327	7.06816	0.00784659	0.432824	up	0	0	71	0	0	0	0	2	0	3	1.67959	1.67959	10.5067	1.67959	1.67959	1.67959	1.67959	4.15401	1.67959	5.41688	chr7	37052903	37073017	-	hsa_circ_0134236	circBase	ENST00000420636	ELMO1	exonic	203
chr11:118461056-118461221+	4.4797	6.68794	4.60594	0.0318614	0.432824	up	16	23	9	5	0	0	0	0	0	2	7.76167	8.16587	7.54855	6.14783	1.67959	1.67959	1.67959	1.67959	1.67959	4.88501	chr11	118461055	118461221	+	hsa_circ_0024476	circBase	NM_001655	ARCN1	exonic	166
chr15:49319562-49320879-	4.45722	6.71926	4.64118	0.0312135	0.432824	up	3	0	14	6	26	0	2	0	0	0	5.43609	1.67959	8.17713	6.39996	8.52203	1.67959	4.99112	1.67959	1.67959	1.67959	chr15	49319561	49320879	-	hsa_circ_0035184	circBase	NM_014701	SECISBP2L	exonic	371
chrM:12746-14150-	4.44787	6.7125	4.60612	0.0318581	0.432824	up	32	1	16	0	0	0	2	0	0	0	8.75099	3.95891	8.36778	1.67959	1.67959	1.67959	4.99112	1.67959	1.67959	1.67959	chrM	12745	14150	-		novel	uc022bqs.1	JA760602	intronic	1405
chr16:256003-258187-	4.4089	6.83066	4.9419	0.0262132	0.432824	up	0	5	39	0	0	3	0	0	0	0	1.67959	6.02104	9.64491	1.67959	1.67959	5.07944	1.67959	1.67959	1.67959	1.67959	chr16	256002	258187	-	hsa_circ_0105298	circBase	NM_018032	LUC7L	exonic	255
chr8:618598-624047-	4.33649	7.1855	5.90159	0.0151272	0.432824	up	6	0	53	0	0	0	0	6	0	0	6.3817	1.67959	10.0859	1.67959	1.67959	1.67959	1.67959	5.55462	1.67959	1.67959	chr8	618597	624047	-	hsa_circ_0136839	circBase	NM_207332	ERICH1	exonic	954
chr9:92089454-92090465-	4.3236	6.57623	4.04838	0.0442136	0.432824	up	8	15	4	22	0	0	0	0	0	2	6.78281	7.55776	6.40915	8.23407	1.67959	1.67959	1.67959	1.67959	1.67959	4.88501	chr9	92089453	92090465	-		novel	ENST00000339861	SEMA4D	intronic	1012
chr14:90390857-90398971-	4.3123	6.61609	4.12509	0.0422519	0.432824	up	4	41	4	4	0	0	2	0	0	0	5.82419	8.99278	6.40915	5.84211	1.67959	1.67959	4.99112	1.67959	1.67959	1.67959	chr14	90390856	90398971	-	hsa_circ_0102829	circBase	ENST00000557685	EFCAB11	exonic	358
chr1:23397718-23398690-	4.24871	7.05859	5.31354	0.0211604	0.432824	up	7	6	34	13	0	0	1	4	0	0	6.59615	6.27216	9.44782	7.48566	1.67959	1.67959	4.12957	5.018	1.67959	1.67959	chr1	23397717	23398690	-		novel	ENST00000427154	RP1-184J9.2	intronic	973
chr10:103557737-103567658-	4.17269	7.55947	6.5658	0.0103957	0.432824	up	0	0	75	2	0	0	0	0	0	6	1.67959	1.67959	10.5856	4.9205	1.67959	1.67959	1.67959	1.67959	1.67959	6.36175	chr10	103557736	103567658	-	hsa_circ_0019608	circBase	NM_012215	MGEA5	exonic	1504
chr12:123030723-123032516+	4.07247	7.09825	5.03149	0.0248905	0.432824	up	1	1	51	0	0	0	0	2	0	3	4.05022	3.95891	10.0306	1.67959	1.67959	1.67959	1.67959	4.15401	1.67959	5.41688	chr12	123030722	123032516	+	hsa_circ_0029098	circBase	NM_014708	KNTC1	exonic	318
chr6:42650793-42652609+	4.02711	6.99888	4.70655	0.030048	0.432824	up	10	0	5	12	41	0	2	3	0	0	7.09632	1.67959	6.72017	7.37233	9.17453	1.67959	4.99112	4.64974	1.67959	1.67959	chr6	42650792	42652609	+	hsa_circ_0076406	circBase	NM_015255	UBR2	exonic	135
chr7:66458204-66458404-	3.95595	7.60379	6.23769	0.0125059	0.432824	up	4	0	76	0	0	0	0	7	0	3	5.82419	1.67959	10.6046	1.67959	1.67959	1.67959	1.67959	5.7629	1.67959	5.41688	chr7	66458203	66458404	-	hsa_circ_0002146	circBase	NM_016038	SBDS	exonic	201
chr14:50262509-50298079-	3.92868	7.07836	4.69658	0.0302228	0.432824	up	25	8	19	16	0	2	0	0	0	3	8.39784	6.67217	8.6135	7.78038	1.67959	4.56125	1.67959	1.67959	1.67959	5.41688	chr14	50262508	50298079	-	hsa_circ_0101944	circBase	uc001wxd.1	NEMF	exonic	1717
chr7:77026299-77033932-	3.55482	7.23552	4.34543	0.0371085	0.432824	up	10	4	4	1	63	6	2	0	0	0	7.09632	5.71679	6.40915	4.06556	9.79146	6.00943	4.99112	1.67959	1.67959	1.67959	chr7	77026298	77033932	-	hsa_circ_0134683	circBase	NM_017439	GSAP	exonic	181
chr6:29901995-29911250+	3.5325	8.13795	6.11235	0.013424	0.432824	up	92	0	51	7	0	0	0	0	0	15	10.2675	1.67959	10.0306	6.61451	1.67959	1.67959	1.67959	1.67959	1.67959	7.64956	chr6	29901994	29911250	+		novel	uc011dmb.3	HLA-G	intronic	9256
chr15:43120126-43132631-	3.5238	7.64924	5.27244	0.0216656	0.432824	up	9	12	6	30	59	6	0	9	0	0	6.94807	7.24195	6.97588	8.67743	9.69718	6.00943	1.67959	6.10643	1.67959	1.67959	chr15	43120125	43132631	-	hsa_circ_0008319	circBase	NM_173500	TTBK2	exonic	320
chr13:20576990-20580726+	3.48083	7.22142	4.18044	0.0408932	0.432824	up	26	0	13	0	38	9	0	0	0	0	8.4539	1.67959	8.07145	1.67959	9.06554	6.57028	1.67959	1.67959	1.67959	1.67959	chr13	20576989	20580726	+	hsa_circ_0005966	circBase	NM_003453	ZMYM2	exonic	665
chr14:103434590-103436598-	3.36597	7.45745	4.45773	0.0347437	0.432824	up	12	0	20	2	56	12	0	0	0	0	7.35372	1.67959	8.68691	4.9205	9.62219	6.97311	1.67959	1.67959	1.67959	1.67959	chr14	103434589	103436598	-	hsa_circ_0006809	circBase	NM_006035	CDC42BPB	exonic	462
chr10:16794538-16796988+	3.33811	7.22256	3.86565	0.0492841	0.432824	up	20	48	8	8	0	0	0	0	0	8	8.07934	9.21887	7.3817	6.80125	1.67959	1.67959	1.67959	1.67959	1.67959	6.76267	chr10	16794537	16796988	+		novel	NM_012425	RSU1	antisense	2451
chr2:58285487-58287336+	3.07161	8.24778	5.00217	0.0253155	0.432824	up	8	19	101	7	0	0	0	0	0	22	6.78281	7.89362	11.0142	6.61451	1.67959	1.67959	1.67959	1.67959	1.67959	8.19476	chr2	58285486	58287336	+		novel	ENST00000428021	VRK2	intronic	1850
chr6:10702602-10702872+	2.82522	7.88567	3.87857	0.0489063	0.432824	up	42	56	23	10	0	1	1	13	0	10	9.14075	9.44015	8.88708	7.11487	1.67959	3.74482	4.12957	6.61615	1.67959	7.07606	chr6	10702601	10702872	+	hsa_circ_0005917	circBase	NM_017906	PAK1IP1	exonic	196
chr7:26724355-26729981-	2.44581	9.18642	4.37842	0.0363967	0.432824	up	44	48	124	46	27	0	26	16	0	28	9.20749	9.21887	11.3097	9.29017	8.57601	1.67959	8.55077	6.90685	1.67959	8.5393	chr7	26724354	26729981	-	hsa_circ_0079658	circBase	NM_003930	SKAP2	exonic	191
